# Supplementary material
Source: MDPI journal article supplement (https://www.mdpi.com/2073-4441/13/13/1813)

**Supporting Information for**

# **Kinetics And Mechanistic Studies Of Photochemical And Oxidative Stability Of Galaxolide**

Aneta Sokol\*, Artur Ratkiewicz, Iwona Tomaszewska, Joanna Karpinska

Address: Faculty of Chemistry, University of Białystok, ul. Ciołkowskiego 1K, 15-245 Białystok,  
Poland

\* Corresponding author, email: a.sokol@uwb.edu.pl

## Table of contents

|                                                                                                                                                                                                                                                                                                                                        |    |
|----------------------------------------------------------------------------------------------------------------------------------------------------------------------------------------------------------------------------------------------------------------------------------------------------------------------------------------|----|
| Figure S1. Chromatographic characterization of (a) HHCB pure standard and transformation products of HHCB after 100 min of irradiation (small insert). .....                                                                                                                                                                           | 4  |
| Figure S2. Mass spectra of HHCB pure standard ( $5 \times 10^{-5}$ mol L <sup>-1</sup> ) (a) and two HHCB-lactones; (b) HHCB-lactone main peak; RT 16.60 min, (c) HHCB-lactone secondary peak; RT 16.95; (d) not identified peak; RT 16.20; (e) not identified; RT 17.30. 1-under full scan conditions, 2-standart mass spectrum. .... | 6  |
| Galaxolide .....                                                                                                                                                                                                                                                                                                                       | 6  |
| TS1 .....                                                                                                                                                                                                                                                                                                                              | 8  |
| IM1 .....                                                                                                                                                                                                                                                                                                                              | 10 |
| P1 (G3) .....                                                                                                                                                                                                                                                                                                                          | 12 |
| TS2 .....                                                                                                                                                                                                                                                                                                                              | 14 |
| TS2A_v1 .....                                                                                                                                                                                                                                                                                                                          | 16 |
| TS2A_v2 .....                                                                                                                                                                                                                                                                                                                          | 18 |
| IM2A_v1 .....                                                                                                                                                                                                                                                                                                                          | 20 |
| IM2A_v2 .....                                                                                                                                                                                                                                                                                                                          | 22 |
| P3A .....                                                                                                                                                                                                                                                                                                                              | 24 |
| TS4A (OH departure) .....                                                                                                                                                                                                                                                                                                              | 26 |
| P4A .....                                                                                                                                                                                                                                                                                                                              | 28 |
| TS5A .....                                                                                                                                                                                                                                                                                                                             | 30 |
| Product P5 (G1) .....                                                                                                                                                                                                                                                                                                                  | 32 |
| P2 .....                                                                                                                                                                                                                                                                                                                               | 34 |
| TS3 .....                                                                                                                                                                                                                                                                                                                              | 36 |
| P3 .....                                                                                                                                                                                                                                                                                                                               | 38 |
| Transition State TS4 .....                                                                                                                                                                                                                                                                                                             | 40 |
| Product P4 (G2) .....                                                                                                                                                                                                                                                                                                                  | 41 |
| TS1B .....                                                                                                                                                                                                                                                                                                                             | 43 |
| P1B .....                                                                                                                                                                                                                                                                                                                              | 45 |
| TS2B (OH addition) .....                                                                                                                                                                                                                                                                                                               | 47 |
| P2B .....                                                                                                                                                                                                                                                                                                                              | 49 |

|                                                                                                                                           |     |
|-------------------------------------------------------------------------------------------------------------------------------------------|-----|
| TS3B_v1.....                                                                                                                              | 51  |
| TS3B_v2.....                                                                                                                              | 53  |
| P3B_v1 .....                                                                                                                              | 55  |
| P3B_v2 .....                                                                                                                              | 57  |
| TS4B_v1.....                                                                                                                              | 59  |
| TS4B_v2.....                                                                                                                              | 61  |
| ProductB.....                                                                                                                             | 63  |
| TS1C_v2.....                                                                                                                              | 67  |
| P2C_v1 .....                                                                                                                              | 69  |
| P2C_v2 .....                                                                                                                              | 71  |
| TS2C_v1.....                                                                                                                              | 73  |
| TS2C_v2.....                                                                                                                              | 75  |
| ProductC.....                                                                                                                             | 77  |
| TS2D .....                                                                                                                                | 79  |
| P2D.....                                                                                                                                  | 81  |
| TS3D_v1 .....                                                                                                                             | 83  |
| TS3D_v2 .....                                                                                                                             | 85  |
| P3D_v1 .....                                                                                                                              | 87  |
| P3D_v2.....                                                                                                                               | 89  |
| TS4D_v1 .....                                                                                                                             | 91  |
| TS4D_v2 .....                                                                                                                             | 93  |
| ProductD.....                                                                                                                             | 95  |
| Figure S50. Energy profile of the proposed 2-nd channel of the reaction mechanism under<br>oxidative conditions. ....                     | 98  |
| Figure S51: The optimized (at the M06-2X/cc-pVDZ level) geometries of the species involved<br>in the reaction scheme from Figure S50..... | 99  |
| Figure S52: Energy profile of the proposed 3-rd channel of the reaction mechanism under<br>oxidative condition. ....                      | 100 |
| Figure S53. The optimized (at the M06-2X/cc-pVDZ level) geometries of the species involved<br>in the reaction scheme from Figure S52..... | 100 |

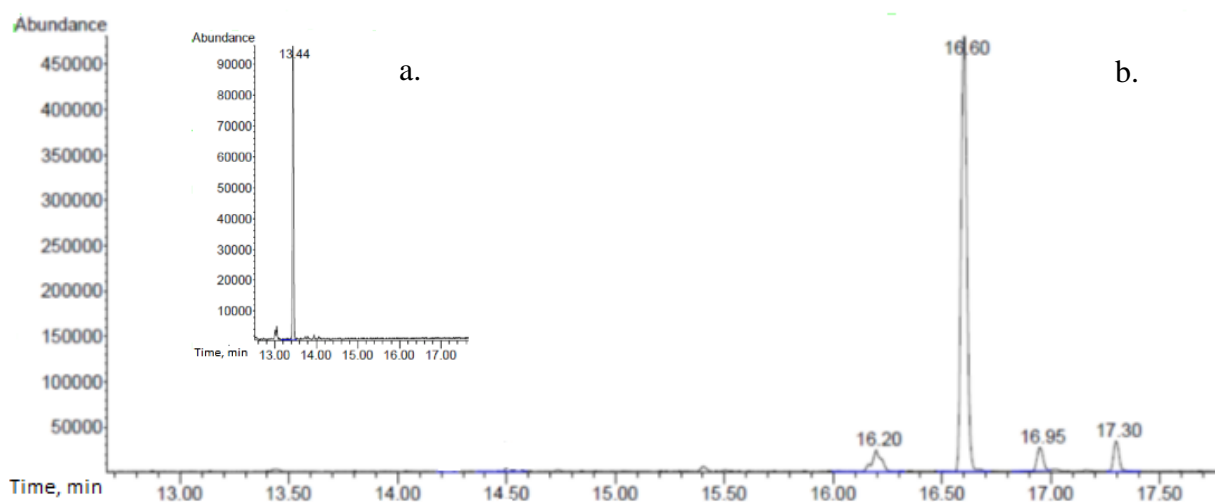

Figure S1. Chromatographic characterization of (a) HHCB pure standard and transformation products of HHCB after 100 min of irradiation (small insert).

a.

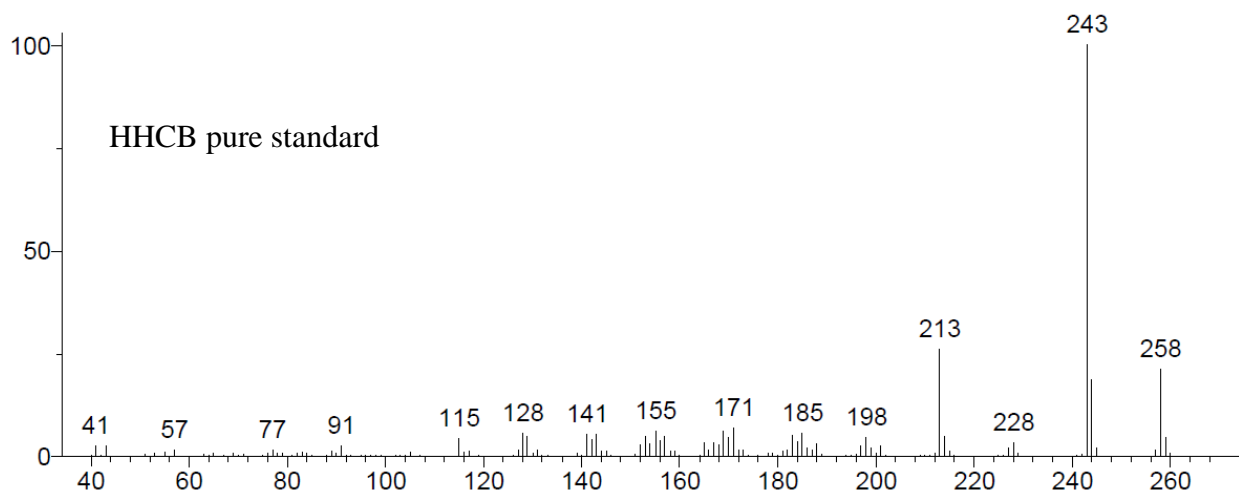

b.

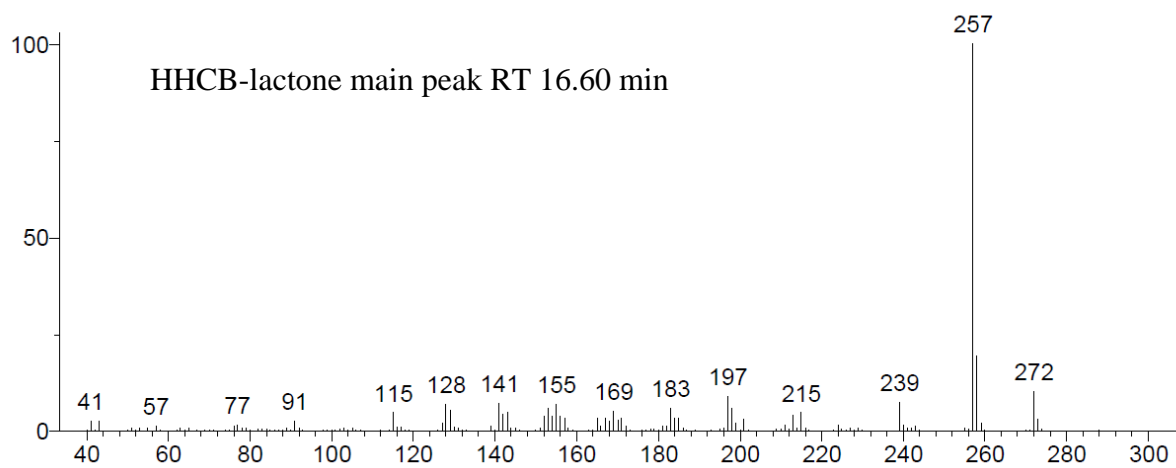

c.

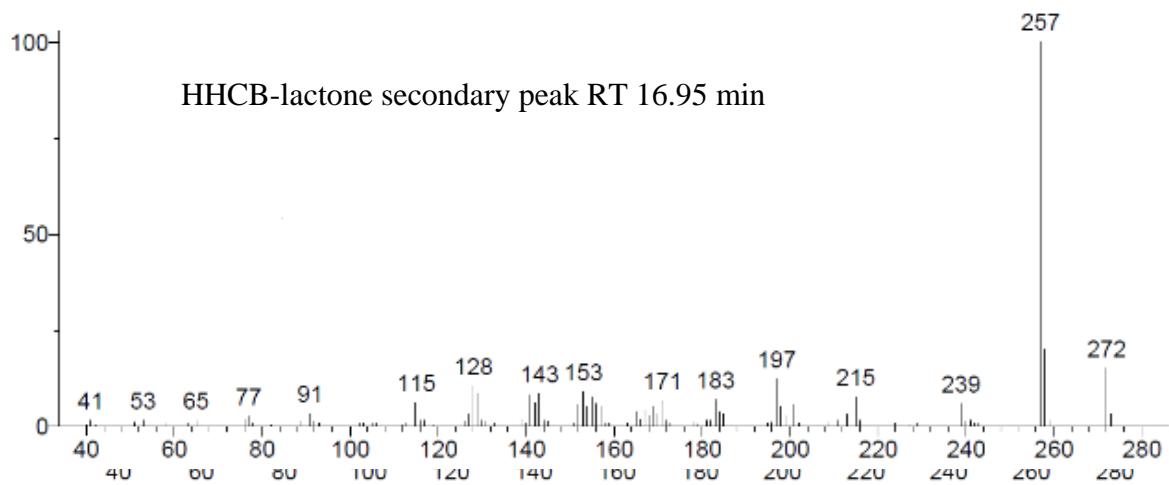

d.

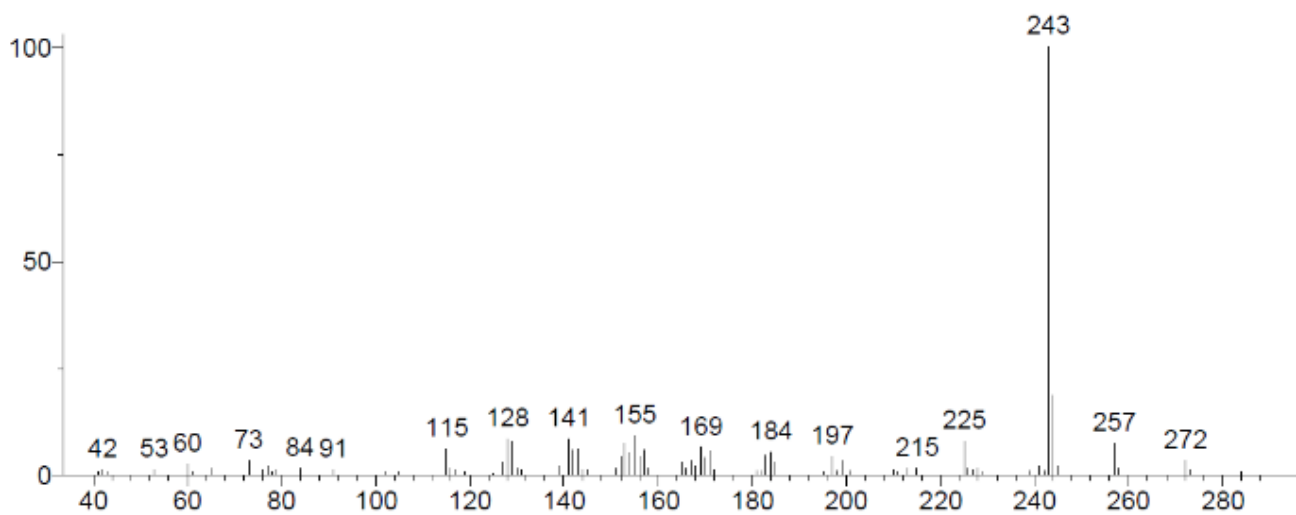

e.

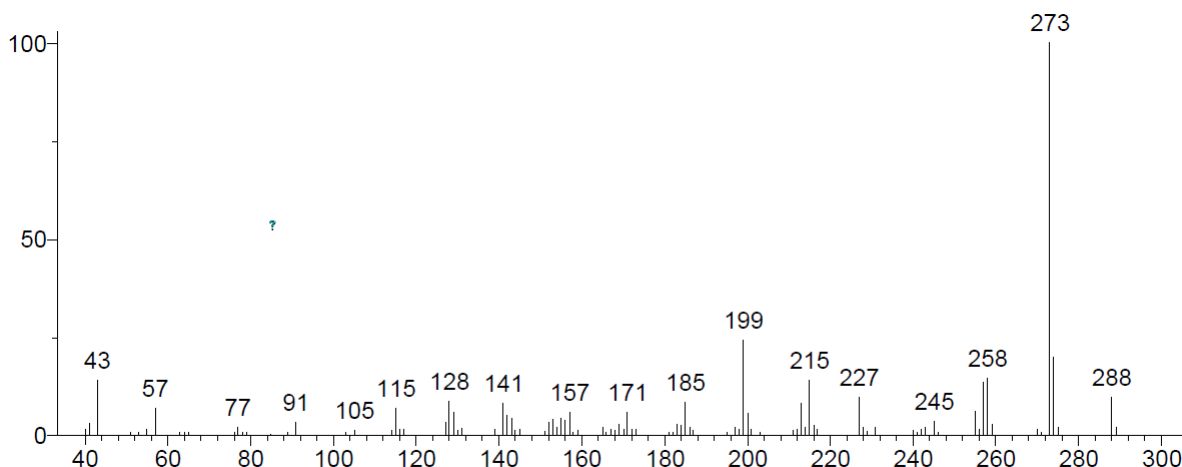

Figure S2. Mass spectra of HHCB pure standard ( $5 \times 10^{-5}$  mol L $^{-1}$ ) (a) and two HHCB-lactones; (b) HHCB-lactone main peak; RT 16.60 min, (c) HHCB-lactone secondary peak; RT 16.95; (d) not identified peak; RT 16.20; (e) not identified; RT 17.30. 1-under full scan conditions, 2-standart mass spectrum.

All reaction geometries and frequencies were calculated at CPCM/M06-2X/cc-pVDZ level of theory. Geometries are in angstroms, frequencies in cm $^{-1}$ .

### Galaxolide

Figure S3. The optimized structure of galaxolide.

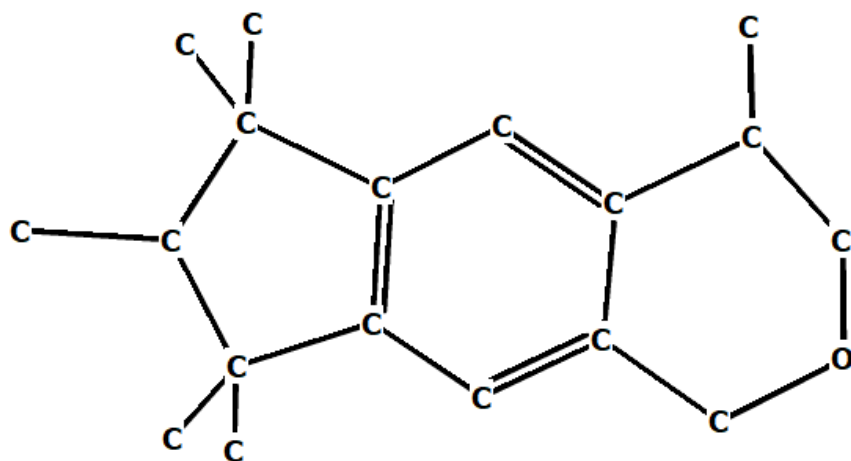

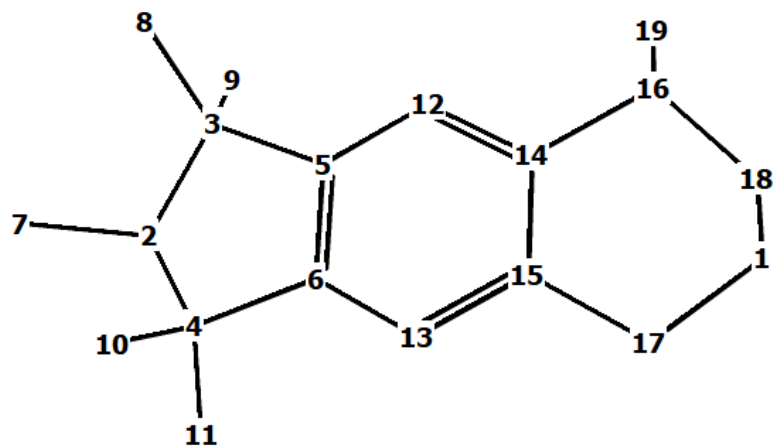

Table S1. Geometry (Å) of galaxolide.

| Atom | x        | y        | z        |
|------|----------|----------|----------|
| O    | 4.050355 | -1.21284 | 0.479631 |
| C    | -2.90717 | 0.16158  | -0.45196 |
| C    | -1.97296 | 1.304385 | 0.057164 |
| C    | -2.19356 | -1.19556 | -0.15777 |
| C    | -0.61677 | 0.62199  | 0.034771 |
| C    | -0.73963 | -0.7645  | -0.08552 |
| C    | -4.3546  | 0.249055 | 0.011221 |
| C    | -2.2936  | 1.780233 | 1.482338 |
| C    | -2.02892 | 2.510248 | -0.88509 |
| C    | -2.61166 | -1.84194 | 1.172263 |
| C    | -2.44464 | -2.19742 | -1.28822 |
| C    | 0.640211 | 1.208727 | 0.140149 |
| C    | 0.398364 | -1.56372 | -0.09016 |
| C    | 1.797902 | 0.416109 | 0.127179 |
| C    | 1.665698 | -0.97867 | 0.020022 |
| C    | 3.181965 | 1.038628 | 0.240084 |
| C    | 2.893161 | -1.86453 | 0.004302 |
| C    | 4.235898 | 0.021613 | -0.18374 |
| C    | 3.342199 | 2.321483 | -0.57402 |
| H    | -2.9022  | 0.255564 | -1.55218 |
| H    | -4.44298 | 0.161836 | 1.103784 |
| H    | -4.80276 | 1.209062 | -0.28776 |
| H    | -4.95845 | -0.55299 | -0.44023 |
| H    | -1.53717 | 2.511105 | 1.807763 |
| H    | -3.27748 | 2.272562 | 1.52102  |
| H    | -2.29224 | 0.952207 | 2.205451 |
| H    | -1.36868 | 3.318669 | -0.53451 |
| H    | -1.72045 | 2.229122 | -1.90316 |
| H    | -3.05329 | 2.91271  | -0.93199 |
| H    | -2.47788 | -1.1604  | 2.024484 |
| H    | -3.66632 | -2.156   | 1.142596 |

|   |          |          |          |
|---|----------|----------|----------|
| H | -1.99806 | -2.73694 | 1.359156 |
| H | -3.52275 | -2.4009  | -1.38701 |
| H | -2.07629 | -1.80764 | -2.24885 |
| H | -1.94117 | -3.15609 | -1.08843 |
| H | 0.727645 | 2.294129 | 0.233288 |
| H | 0.315019 | -2.652   | -0.17326 |
| H | 3.364913 | 1.270425 | 1.303984 |
| H | 2.734388 | -2.73959 | 0.649811 |
| H | 3.066836 | -2.2365  | -1.02538 |
| H | 4.193087 | -0.12681 | -1.28201 |
| H | 5.2424   | 0.377016 | 0.075869 |
| H | 3.097874 | 2.141864 | -1.63248 |
| H | 2.694768 | 3.127884 | -0.2058  |
| H | 4.381108 | 2.679819 | -0.51631 |

Table S2. Frequencies (cm<sup>-1</sup>) of galaxolide.

|      |      |      |      |      |      |      |      |
|------|------|------|------|------|------|------|------|
| 43   | 61   | 92   | 113  | 144  | 151  | 201  | 230  |
| 238  | 243  | 248  | 260  | 262  | 273  | 276  | 288  |
| 307  | 316  | 331  | 333  | 351  | 374  | 380  | 389  |
| 415  | 457  | 483  | 516  | 525  | 550  | 560  | 589  |
| 629  | 679  | 690  | 723  | 772  | 785  | 823  | 832  |
| 902  | 911  | 919  | 931  | 944  | 944  | 953. | 960  |
| 983  | 991  | 1003 | 1016 | 1025 | 1027 | 1069 | 1091 |
| 1105 | 1122 | 1146 | 1155 | 1161 | 1182 | 1208 | 1212 |
| 1216 | 1233 | 1246 | 1254 | 1259 | 1295 | 1302 | 1311 |
| 1326 | 1340 | 1350 | 1351 | 1371 | 1374 | 1376 | 1380 |
| 1384 | 1387 | 1390 | 1396 | 1412 | 1438 | 1444 | 1448 |
| 1450 | 1454 | 1456 | 1458 | 1462 | 1462 | 1467 | 1469 |
| 1470 | 1476 | 1478 | 1493 | 1544 | 1660 | 1704 | 3003 |
| 3006 | 3036 | 3039 | 3045 | 3046 | 3046 | 3052 | 3053 |
| 3055 | 3119 | 3119 | 3121 | 3125 | 3125 | 3126 | 3127 |
| 3129 | 3132 | 3136 | 3143 | 3145 | 3146 | 3151 | 3180 |
| 3198 |      |      |      |      |      |      |      |

## TS1

Figure S4. The optimized structure of the TS1 transition state.



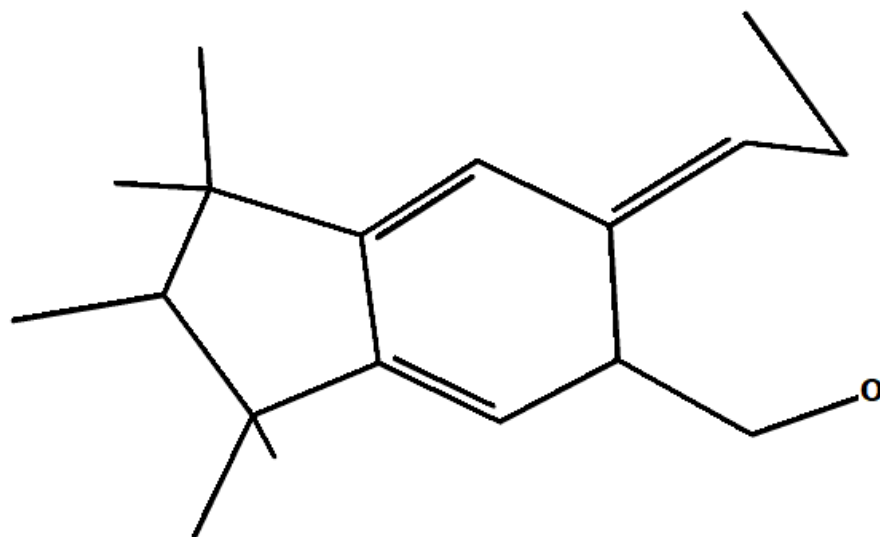

Table S3. Geometry (Å) of the TS1 transition state.

| Atom | x        | y        | z        |
|------|----------|----------|----------|
| O    | 3.988673 | -1.40978 | 1.021008 |
| C    | -2.86492 | 0.185545 | -0.46105 |
| C    | -1.97159 | 1.312957 | 0.146052 |
| C    | -2.16508 | -1.17834 | -0.16742 |
| C    | -0.613   | 0.637383 | 0.177299 |
| C    | -0.71837 | -0.75106 | 0.0034   |
| C    | -4.33911 | 0.254689 | -0.08763 |
| C    | -2.3819  | 1.730521 | 1.566688 |
| C    | -1.97911 | 2.553608 | -0.75127 |
| C    | -2.65687 | -1.86719 | 1.115352 |
| C    | -2.34256 | -2.14518 | -1.3413  |
| C    | 0.632442 | 1.211051 | 0.369651 |
| C    | 0.4113   | -1.55716 | 0.050104 |
| C    | 1.781063 | 0.394912 | 0.36511  |
| C    | 1.687604 | -1.00511 | 0.240475 |
| C    | 3.110401 | 1.012678 | 0.489791 |
| C    | 4.19053  | 0.58519  | -0.27135 |
| C    | 3.483214 | 2.000902 | -1.06446 |
| H    | -2.79088 | 0.317027 | -1.55505 |
| H    | -4.4967  | 0.130184 | 0.993318 |
| H    | -4.77049 | 1.224273 | -0.38015 |
| H    | -4.91039 | -0.53177 | -0.60398 |
| H    | -1.64985 | 2.448388 | 1.967748 |
| H    | -3.36768 | 2.220461 | 1.56247  |
| H    | -2.42417 | 0.87413  | 2.25443  |
| H    | -1.35166 | 3.353421 | -0.32788 |
| H    | -1.60176 | 2.314265 | -1.7567  |
| H    | -3.00242 | 2.949014 | -0.84952 |

|   |          |          |          |
|---|----------|----------|----------|
| H | -2.57918 | -1.21259 | 1.995079 |
| H | -3.70596 | -2.18358 | 1.010793 |
| H | -2.05052 | -2.76532 | 1.309507 |
| H | -3.41199 | -2.34573 | -1.51217 |
| H | -1.91668 | -1.7262  | -2.26514 |
| H | -1.85035 | -3.10902 | -1.13957 |
| H | 0.7351   | 2.292967 | 0.496486 |
| H | 0.319439 | -2.64558 | -0.03504 |
| H | 3.293685 | 1.734322 | 1.289399 |
| H | 4.052209 | -0.19679 | -1.0118  |
| H | 5.204349 | 0.845069 | 0.023316 |
| H | 2.858847 | 1.608865 | -1.86864 |
| H | 2.983466 | 2.838495 | -0.56121 |
| H | 4.451867 | 2.38739  | -1.40475 |
| C | 2.910711 | -1.93469 | 0.423042 |
| H | 3.078658 | -2.3469  | -0.62186 |
| H | 2.467824 | -2.82671 | 0.951154 |

Table S4. Frequencies (cm<sup>-1</sup>) of the TS1 transition state.

|      |      |      |      |      |      |      |      |
|------|------|------|------|------|------|------|------|
| 45   | 50   | 81   | 107  | 125  | 136  | 163  | 167  |
| 181  | 225  | 232  | 238  | 242  | 253  | 264  | 272  |
| 283  | 284  | 305  | 312  | 329  | 330  | 344  | 368  |
| 381  | 410  | 428  | 488  | 523  | 549  | 551  | 572  |
| 592  | 622  | 671  | 709  | 718  | 750  | 780  | 824  |
| 831  | 850  | 909  | 916  | 925  | 936  | 944. | 947  |
| 954  | 978  | 993  | 1000 | 1005 | 1012 | 1026 | 1036 |
| 1089 | 1092 | 1105 | 1113 | 1142 | 1161 | 1163 | 1208 |
| 1210 | 1217 | 1220 | 1245 | 1251 | 1256 | 1275 | 1295 |
| 1299 | 1311 | 1348 | 1349 | 1351 | 1371 | 1374 | 1384 |
| 1389 | 1396 | 1400 | 1400 | 1411 | 1433 | 1438 | 1439 |
| 1443 | 1446 | 1454 | 1455 | 1460 | 1461 | 1468 | 1472 |
| 1476 | 1480 | 1529 | 1599 | 1643 | 1696 | 2684 | 2786 |
| 3031 | 3040 | 3042 | 3046 | 3050 | 3055 | 3095 | 3120 |
| 3123 | 3123 | 3125 | 3130 | 3130 | 3133 | 3140 | 3140 |
| 3158 | 3162 | 3174 | 3181 | 3212 | 3215 | 3246 | 3335 |
| -591 |      |      |      |      |      |      |      |

# IM1

Figure S5. The optimized structure of IM1.

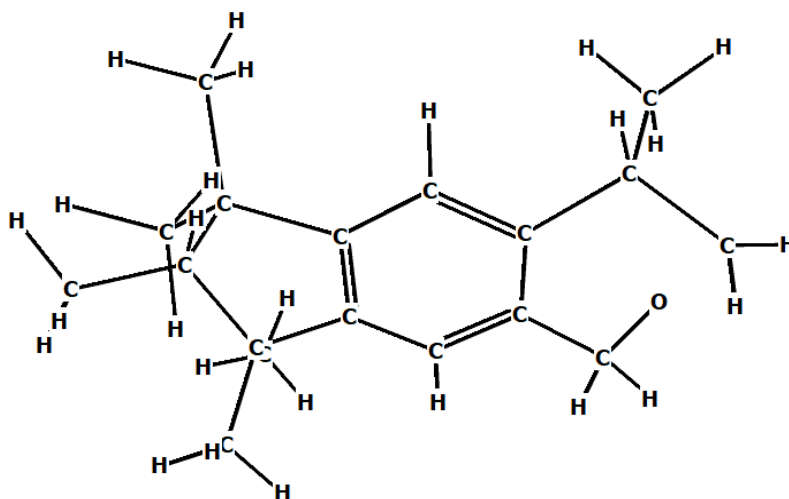

Table S5. Geometry (Å) of IM1.

| Atom | x        | y        | z        |
|------|----------|----------|----------|
| O    | 3.9242   | -1.68105 | -0.72329 |
| C    | -2.89564 | -0.01567 | -0.34367 |
| C    | -1.99382 | 1.256029 | -0.2542  |
| C    | -2.09382 | -1.206   | 0.273311 |
| C    | -0.60846 | 0.64043  | -0.17871 |
| C    | -0.66457 | -0.71997 | 0.116679 |
| C    | -4.31382 | 0.154144 | 0.182779 |
| C    | -2.24989 | 2.112136 | 0.995732 |
| C    | -2.16975 | 2.135773 | -1.49486 |
| C    | -2.40064 | -1.45908 | 1.757534 |
| C    | -2.35416 | -2.49742 | -0.50762 |
| C    | 0.624648 | 1.267632 | -0.33455 |
| C    | 0.516807 | -1.44347 | 0.251653 |
| C    | 1.825869 | 0.556081 | -0.2032  |
| C    | 1.763152 | -0.82344 | 0.093084 |
| C    | 3.124087 | 1.333178 | -0.44403 |
| C    | 4.240839 | 0.992345 | 0.488801 |
| C    | 3.548639 | 1.241394 | -1.91602 |
| H    | -2.96416 | -0.24341 | -1.422   |
| H    | -4.32855 | 0.379022 | 1.258944 |
| H    | -4.82901 | 0.974165 | -0.34057 |
| H    | -4.9018  | -0.76257 | 0.02256  |
| H    | -1.51087 | 2.926811 | 1.044971 |
| H    | -3.25209 | 2.566387 | 0.961736 |
| H    | -2.16633 | 1.526595 | 1.92241  |
| H    | -1.535   | 3.03363  | -1.43829 |
| H    | -1.90721 | 1.583719 | -2.40962 |
| H    | -3.21523 | 2.472    | -1.58039 |
| H    | -2.25841 | -0.55748 | 2.370144 |
| H    | -3.43621 | -1.8078  | 1.890658 |

|   |          |          |          |
|---|----------|----------|----------|
| H | -1.72906 | -2.23934 | 2.147896 |
| H | -3.42382 | -2.75805 | -0.47007 |
| H | -2.06157 | -2.38486 | -1.56222 |
| H | -1.7897  | -3.34052 | -0.07992 |
| H | 0.670841 | 2.337203 | -0.56194 |
| H | 0.483174 | -2.51323 | 0.47953  |
| H | 2.855086 | 2.387815 | -0.24697 |
| H | 4.132867 | 1.167759 | 1.560388 |
| H | 5.163926 | 0.541762 | 0.121915 |
| H | 3.797771 | 0.202329 | -2.169   |
| H | 2.735283 | 1.581068 | -2.57366 |
| H | 4.429877 | 1.874642 | -2.09841 |
| C | 2.987674 | -1.69895 | 0.27223  |
| H | 2.68717  | -2.74655 | 0.476927 |
| H | 3.552258 | -1.40556 | 1.18703  |

Table S6. Frequencies ( $\text{cm}^{-1}$ ) of IM1.

|      |      |      |      |      |      |      |      |
|------|------|------|------|------|------|------|------|
| 48   | 55   | 96   | 120  | 134  | 140  | 153  | 195  |
| 218  | 221  | 229  | 237  | 253  | 256  | 270  | 274  |
| 280  | 282  | 292  | 298  | 302  | 313  | 329  | 344  |
| 356  | 378  | 401  | 425  | 429  | 459  | 512  | 543  |
| 550  | 556  | 589  | 606  | 624  | 684  | 712  | 728  |
| 752  | 791  | 820  | 833  | 894  | 919  | 923. | 928  |
| 938  | 943  | 948  | 953  | 989  | 995  | 1003 | 1027 |
| 1028 | 1076 | 1091 | 1103 | 1114 | 1141 | 1157 | 1160 |
| 1162 | 1201 | 1209 | 1216 | 1223 | 1243 | 1252 | 1294 |
| 1299 | 1318 | 1327 | 1331 | 1348 | 1351 | 1355 | 1370 |
| 1372 | 1373 | 1374 | 1384 | 1390 | 1395 | 1434 | 1440 |
| 1444 | 1447 | 1451 | 1453 | 1454 | 1459 | 1461 | 1466 |
| 1467 | 1474 | 1477 | 1480 | 1544 | 1656 | 1700 | 2961 |
| 3011 | 3018 | 3033 | 3040 | 3041 | 3046 | 3052 | 3055 |
| 3056 | 3117 | 3119 | 3125 | 3126 | 3132 | 3133 | 3136 |
| 3138 | 3138 | 3143 | 3150 | 3165 | 3168 | 3170 | 3172 |
| 3288 |      |      |      |      |      |      |      |

### P1 (G3)

Figure S6. The optimized structure of P1(G3).

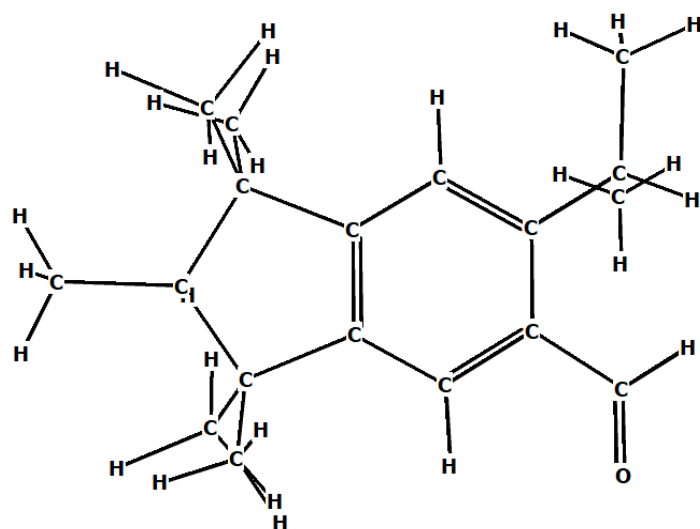

Table S7. Geometry (Å) of P1(G3).

| Atom | x        | y        | z        |
|------|----------|----------|----------|
| O    | 1.397296 | -1.42224 | -4.05188 |
| C    | -2.72532 | 0.59688  | 0.570699 |
| C    | -1.39376 | 0.591387 | 1.386177 |
| C    | -2.5138  | -0.31326 | -0.6807  |
| C    | -0.38144 | 0.229544 | 0.315482 |
| C    | -1.00459 | -0.27253 | -0.83049 |
| C    | -3.9839  | 0.309605 | 1.377313 |
| C    | -1.35491 | -0.45692 | 2.509234 |
| C    | -1.12219 | 1.970327 | 1.994126 |
| C    | -2.98056 | -1.76296 | -0.47986 |
| C    | -3.22798 | 0.268154 | -1.90388 |
| C    | 1.006419 | 0.331019 | 0.389535 |
| C    | -0.2278  | -0.67263 | -1.90691 |
| C    | 1.812006 | -0.06124 | -0.68727 |
| C    | 1.17052  | -0.56563 | -1.8431  |
| C    | 3.324398 | 0.114025 | -0.62825 |
| C    | 1.92781  | -1.01027 | -3.03997 |
| C    | 3.737485 | 1.369781 | -1.40893 |
| C    | 3.879024 | 0.178583 | 0.794838 |
| H    | -2.81193 | 1.622141 | 0.169956 |
| H    | -3.97622 | -0.70149 | 1.809498 |
| H    | -4.09018 | 1.028125 | 2.204213 |
| H    | -4.8806  | 0.397721 | 0.745033 |
| H    | -0.35591 | -0.46844 | 2.971611 |
| H    | -2.08775 | -0.21244 | 3.292999 |
| H    | -1.56691 | -1.47052 | 2.141034 |
| H    | -0.18844 | 1.971047 | 2.577279 |
| H    | -1.04216 | 2.738311 | 1.210514 |
| H    | -1.94026 | 2.253431 | 2.6748   |

|   |          |          |          |
|---|----------|----------|----------|
| H | -2.52415 | -2.22708 | 0.40569  |
| H | -4.0746  | -1.81017 | -0.3698  |
| H | -2.70165 | -2.36647 | -1.35722 |
| H | -4.31177 | 0.332832 | -1.71864 |
| H | -2.85495 | 1.277171 | -2.13478 |
| H | -3.07756 | -0.36823 | -2.78981 |
| H | 1.466972 | 0.723159 | 1.297504 |
| H | -0.67114 | -1.07296 | -2.82137 |
| H | 3.788741 | -0.75936 | -1.11037 |
| H | 3.287307 | 2.262827 | -0.94756 |
| H | 4.831068 | 1.488563 | -1.39696 |
| H | 3.578701 | 1.106824 | 1.30378  |
| H | 3.541562 | -0.67376 | 1.401719 |
| H | 4.977582 | 0.164702 | 0.760789 |
| H | 3.035141 | -0.95925 | -2.98366 |
| H | 3.405485 | 1.329796 | -2.45682 |

Table S8. Frequencies ( $\text{cm}^{-1}$ ) of P1(G3).

|      |      |      |      |      |      |      |      |
|------|------|------|------|------|------|------|------|
| 37   | 61   | 64   | 101  | 135  | 137  | 149  | 184  |
| 218  | 232  | 240  | 244  | 250  | 257  | 260  | 271  |
| 273  | 288  | 302  | 311  | 321  | 328  | 342  | 351  |
| 361  | 399  | 408  | 442  | 484  | 505  | 526  | 537  |
| 554  | 601  | 632  | 672  | 708  | 725  | 784  | 794  |
| 826  | 845  | 914  | 916  | 926  | 940  | 946. | 948  |
| 952  | 958  | 968  | 993  | 1006 | 1012 | 1029 | 1044 |
| 1082 | 1091 | 1105 | 1126 | 1147 | 1149 | 1163 | 1191 |
| 1211 | 1217 | 1230 | 1246 | 1254 | 1296 | 1313 | 1334 |
| 1348 | 1351 | 1355 | 1369 | 1373 | 1374 | 1384 | 1387 |
| 1391 | 1393 | 1400 | 1440 | 1444 | 1445 | 1447 | 1451 |
| 1456 | 1457 | 1458 | 1461 | 1462 | 1463 | 1470 | 1476 |
| 1478 | 1481 | 1483 | 1538 | 1653 | 1696 | 1812 | 3031 |
| 3032 | 3044 | 3045 | 3046 | 3048 | 3053 | 3054 | 3058 |
| 3087 | 3124 | 3126 | 3127 | 3128 | 3131 | 3134 | 3134 |
| 3135 | 3136 | 3137 | 3143 | 3143 | 3144 | 3156 | 3200 |
| 3207 |      |      |      |      |      |      |      |

## TS2

Figure S7. The optimized structure of TS2.

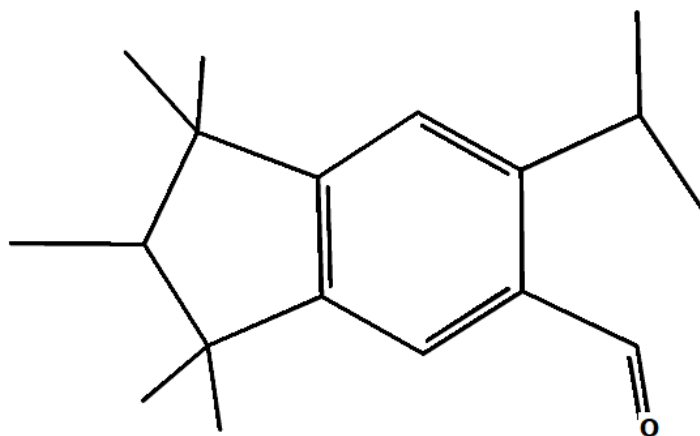

Table S9. Geometry (Å) of TS2.

| Atom | x        | y        | z        |
|------|----------|----------|----------|
| O    | 2.067804 | -0.21576 | -3.92122 |
| C    | -2.74385 | 0.530361 | 0.655987 |
| C    | -1.46547 | 0.42881  | 1.546021 |
| C    | -2.43715 | -0.19713 | -0.69082 |
| C    | -0.38105 | 0.21896  | 0.504512 |
| C    | -0.92156 | -0.1279  | -0.73715 |
| C    | -4.0423  | 0.118862 | 1.33572  |
| C    | -1.47978 | -0.75711 | 2.523603 |
| C    | -1.25792 | 1.718377 | 2.345331 |
| C    | -2.89251 | -1.66456 | -0.72275 |
| C    | -3.08371 | 0.540732 | -1.86671 |
| C    | 1.000477 | 0.333423 | 0.680393 |
| C    | -0.08604 | -0.37629 | -1.82583 |
| C    | 1.840746 | 0.075366 | -0.40166 |
| C    | 1.293323 | -0.2896  | -1.63991 |
| C    | 3.354083 | 0.216134 | -0.41807 |
| C    | 2.269145 | -0.57017 | -2.74763 |
| C    | 3.713878 | 0.597206 | -1.82954 |
| C    | 3.893339 | 1.234755 | 0.592223 |
| H    | -2.82749 | 1.599582 | 0.393312 |
| H    | -4.03657 | -0.94268 | 1.621649 |
| H    | -4.21116 | 0.713129 | 2.246767 |
| H    | -4.9015  | 0.283926 | 0.6678   |
| H    | -0.50951 | -0.82351 | 3.039751 |
| H    | -2.26092 | -0.62508 | 3.28783  |
| H    | -1.65389 | -1.71454 | 2.012262 |
| H    | -0.36166 | 1.653601 | 2.981381 |
| H    | -1.14527 | 2.583471 | 1.674968 |
| H    | -2.12104 | 1.900656 | 3.00495  |
| H    | -2.4808  | -2.2459  | 0.114441 |
| H    | -3.99035 | -1.73492 | -0.68625 |

|   |          |          |          |
|---|----------|----------|----------|
| H | -2.55492 | -2.13749 | -1.65792 |
| H | -4.17813 | 0.569115 | -1.74501 |
| H | -2.71519 | 1.575287 | -1.93248 |
| H | -2.8666  | 0.034451 | -2.82001 |
| H | 1.412111 | 0.639263 | 1.645041 |
| H | -0.48584 | -0.63823 | -2.80855 |
| H | 3.806063 | -0.76569 | -0.19378 |
| H | 3.365414 | 1.577458 | -2.17111 |
| H | 4.660151 | 0.256284 | -2.25589 |
| H | 3.425413 | 2.218095 | 0.435964 |
| H | 3.684779 | 0.908362 | 1.621064 |
| H | 4.981584 | 1.342416 | 0.486539 |
| H | 2.959806 | -1.42314 | -2.54561 |

Table S10. Frequencies ( $\text{cm}^{-1}$ ) of TS2.

|      |      |      |      |      |      |      |      |
|------|------|------|------|------|------|------|------|
| 46   | 61   | 98   | 110  | 134  | 146  | 181  | 219  |
| 222  | 234  | 242  | 248  | 259  | 268  | 270  | 279  |
| 291  | 308  | 328  | 333  | 342  | 357  | 373  | 394  |
| 416  | 426  | 486  | 508  | 531  | 544  | 556  | 590  |
| 616  | 636  | 656  | 712  | 729  | 780  | 798  | 821  |
| 836  | 881  | 911  | 915  | 926  | 937  | 941. | 942  |
| 946  | 952  | 986  | 991  | 1004 | 1009 | 1027 | 1056 |
| 1090 | 1099 | 1113 | 1142 | 1158 | 1160 | 1169 | 1206 |
| 1214 | 1226 | 1240 | 1243 | 1292 | 1307 | 1312 | 1349 |
| 1349 | 1351 | 1361 | 1373 | 1374 | 1376 | 1378 | 1385 |
| 1389 | 1395 | 1436 | 1439 | 1444 | 1446 | 1450 | 1453 |
| 1456 | 1458 | 1460 | 1463 | 1466 | 1473 | 1476 | 1488 |
| 1530 | 1599 | 1664 | 1696 | 2942 | 3038 | 3040 | 3043 |
| 3048 | 3050 | 3052 | 3054 | 3061 | 3117 | 3121 | 3125 |
| 3128 | 3129 | 3137 | 3137 | 3138 | 3140 | 3142 | 3144 |
| 3149 | 3160 | 3184 | 3187 | 3252 |      |      |      |
| 3207 | -411 |      |      |      |      |      |      |

TS2A\_v1

Figure S8. The optimized structure of TS2A\_v1.



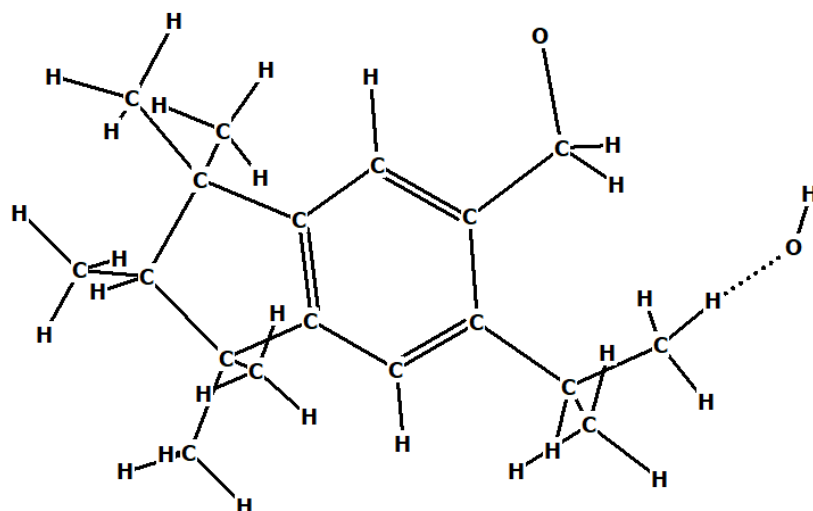

Table S11. Geometry (Å) of TS2a\_v1.

| Atom | x        | y        | z        |
|------|----------|----------|----------|
| O    | 2.587108 | -3.10698 | 0.468914 |
| C    | -2.80671 | 0.205303 | -0.86744 |
| C    | -1.8719  | 1.427029 | -0.5974  |
| C    | -2.1578  | -1.04273 | -0.18965 |
| C    | -0.54166 | 0.740267 | -0.3473  |
| C    | -0.70045 | -0.62541 | -0.11876 |
| C    | -4.27781 | 0.42887  | -0.54719 |
| C    | -2.26957 | 2.252985 | 0.635672 |
| C    | -1.82512 | 2.355338 | -1.81428 |
| C    | -2.68768 | -1.32928 | 1.223944 |
| C    | -2.35818 | -2.29421 | -1.04935 |
| C    | 0.727942 | 1.308119 | -0.29731 |
| C    | 0.410585 | -1.41401 | 0.16219  |
| C    | 1.862836 | 0.531057 | -0.01881 |
| C    | 1.69034  | -0.85006 | 0.214053 |
| C    | 3.21073  | 1.24154  | -0.05794 |
| C    | 4.148244 | 0.979047 | 1.119731 |
| C    | 3.926583 | 1.012761 | -1.39732 |
| H    | -2.72601 | 0.017227 | -1.9526  |
| H    | -4.44158 | 0.624596 | 0.522441 |
| H    | -4.67439 | 1.287389 | -1.11057 |
| H    | -4.87536 | -0.45351 | -0.82305 |
| H    | -1.51051 | 3.028283 | 0.822789 |
| H    | -3.23563 | 2.756567 | 0.477507 |
| H    | -2.34619 | 1.633484 | 1.540528 |
| H    | -1.16198 | 3.215293 | -1.63235 |
| H    | -1.46098 | 1.820234 | -2.70402 |
| H    | -2.82997 | 2.749998 | -2.0335  |
| H    | -2.59308 | -0.45722 | 1.886516 |

|   |          |          |          |
|---|----------|----------|----------|
| H | -3.74685 | -1.62784 | 1.193899 |
| H | -2.11576 | -2.15574 | 1.673286 |
| H | -3.43197 | -2.50891 | -1.16984 |
| H | -1.91642 | -2.16035 | -2.04805 |
| H | -1.89176 | -3.17448 | -0.58048 |
| H | 0.855318 | 2.379249 | -0.48059 |
| H | 0.3072   | -2.48625 | 0.339708 |
| H | 2.972626 | 2.31703  | -0.00855 |
| H | 3.640584 | 0.706925 | 2.055367 |
| H | 4.823196 | 1.828215 | 1.292908 |
| H | 4.170581 | -0.05096 | -1.5395  |
| H | 3.293737 | 1.337029 | -2.23513 |
| H | 4.869002 | 1.580119 | -1.42988 |
| C | 2.847614 | -1.77341 | 0.551169 |
| H | 3.759889 | -1.57126 | -0.04896 |
| H | 3.218638 | -1.58624 | 1.584953 |
| O | 5.883666 | -0.86025 | 0.519492 |
| H | 5.891801 | -1.2708  | 1.408624 |
| H | 4.888816 | 0.111262 | 0.845883 |

Table S12. Frequencies (cm<sup>-1</sup>) of TS2a\_v1.

|      |      |      |      |      |      |      |      |
|------|------|------|------|------|------|------|------|
| 38   | 45   | 72   | 93   | 104  | 120  | 139  | 145  |
| 148  | 179  | 211  | 227  | 236  | 241  | 253  | 258  |
| 263  | 270  | 274  | 279  | 290  | 295  | 312  | 319  |
| 331  | 341  | 355  | 360  | 399  | 409  | 435  | 455  |
| 502  | 526  | 551  | 555  | 571  | 593  | 635  | 658  |
| 710  | 724  | 734  | 767  | 792  | 820  | 837. | 913  |
| 921  | 937  | 940  | 944  | 948  | 953  | 959  | 973  |
| 990  | 1001 | 1002 | 1025 | 1040 | 1070 | 1084 | 1091 |
| 1106 | 1127 | 1144 | 1152 | 1156 | 1162 | 1197 | 1212 |
| 1218 | 1235 | 1244 | 1251 | 1295 | 1305 | 1309 | 1317 |
| 1340 | 1349 | 1350 | 1356 | 1366 | 1372 | 1373 | 1384 |
| 1384 | 1388 | 1396 | 1398 | 1412 | 1441 | 1444 | 1447 |
| 1449 | 1456 | 1456 | 1461 | 1464 | 1466 | 1468 | 1475 |
| 1477 | 1479 | 1491 | 1545 | 1661 | 1705 | 2957 | 2996 |
| 3030 | 3044 | 3044 | 3046 | 3048 | 3049 | 3050 | 3059 |
| 3094 | 3121 | 3122 | 3123 | 3126 | 3127 | 3133 | 3135 |
| 3139 | 3139 | 3141 | 3151 | 3156 | 3163 | 3169 | 3194 |
| 3700 | -861 |      |      |      |      |      |      |

TS2A\_v2

Figure S9. The optimized structure of TS2a\_v2.

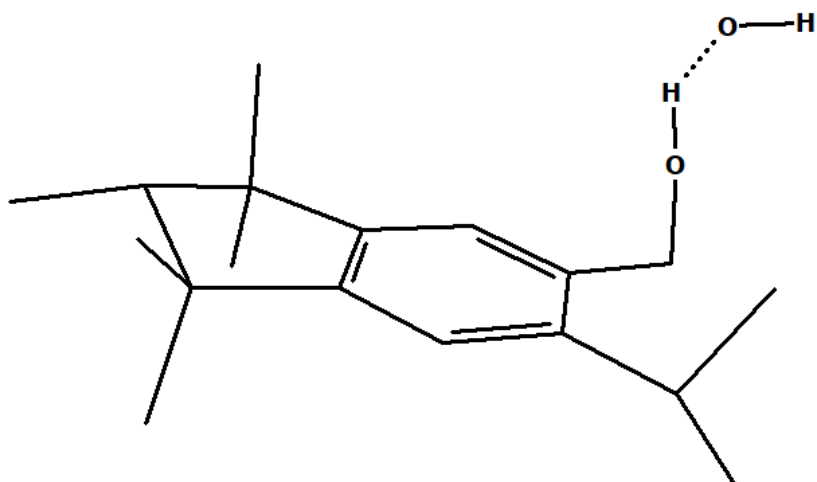

Table S13. Geometry (Å) of TS2a\_v2.

| Atom | x        | y        | z        |
|------|----------|----------|----------|
| O    | -4.35215 | 2.033717 | -0.13747 |
| C    | 1.873841 | -1.01051 | 1.763308 |
| C    | 1.288428 | -1.48413 | 0.394544 |
| C    | 0.688692 | -0.45804 | 2.617231 |
| C    | 0.020968 | -0.65637 | 0.307106 |
| C    | -0.31319 | -0.08444 | 1.538737 |
| C    | 2.771457 | -2.01698 | 2.469552 |
| C    | 0.944903 | -2.98167 | 0.351871 |
| C    | 2.262524 | -1.17571 | -0.74673 |
| C    | 0.072676 | -1.49684 | 3.566862 |
| C    | 1.132422 | 0.753625 | 3.44132  |
| C    | -0.80318 | -0.44933 | -0.80119 |
| C    | -1.4542  | 0.684947 | 1.657243 |
| C    | -1.96208 | 0.324942 | -0.72807 |
| C    | -2.30758 | 0.917153 | 0.535746 |
| C    | -2.78888 | 0.579982 | -1.9795  |
| C    | -3.44407 | 1.730045 | 0.807525 |
| C    | -2.4817  | 1.977194 | -2.53708 |
| C    | -2.59972 | -0.47001 | -3.07469 |
| H    | 2.489683 | -0.12633 | 1.521243 |
| H    | 2.229588 | -2.93516 | 2.739192 |
| H    | 3.617292 | -2.30431 | 1.826319 |
| H    | 3.188333 | -1.5879  | 3.393728 |
| H    | 0.44908  | -3.22038 | -0.60192 |
| H    | 1.854493 | -3.59797 | 0.422866 |
| H    | 0.265283 | -3.27255 | 1.165246 |
| H    | 1.850924 | -1.49672 | -1.71638 |
| H    | 2.474623 | -0.09748 | -0.80205 |
| H    | 3.214158 | -1.7098  | -0.59523 |
| H    | -0.24316 | -2.40711 | 3.037475 |

|   |          |          |          |
|---|----------|----------|----------|
| H | 0.788405 | -1.78437 | 4.352503 |
| H | -0.81498 | -1.06863 | 4.057414 |
| H | 1.940479 | 0.471119 | 4.134859 |
| H | 1.500622 | 1.559624 | 2.789122 |
| H | 0.299944 | 1.149658 | 4.043641 |
| H | -0.52916 | -0.90577 | -1.7545  |
| H | -1.72254 | 1.13176  | 2.618964 |
| H | -3.84842 | 0.56072  | -1.68688 |
| H | -1.43157 | 2.025264 | -2.86833 |
| H | -3.12494 | 2.199004 | -3.40281 |
| H | -1.59627 | -0.41511 | -3.52388 |
| H | -2.74814 | -1.4901  | -2.69071 |
| H | -3.32775 | -0.29633 | -3.88028 |
| H | -3.54823 | 2.09396  | 1.838724 |
| H | -2.64445 | 2.75558  | -1.77912 |
| O | -6.25331 | 3.178924 | 0.411111 |
| H | -5.3892  | 2.372778 | 0.23332  |
| H | -6.56628 | 3.448156 | -0.48464 |

Table S14. Frequencies (cm<sup>-1</sup>) of TS2a\_v2.

|      |       |      |      |      |      |      |      |
|------|-------|------|------|------|------|------|------|
| 33   | 52    | 66   | 87   | 98   | 117  | 123  | 140  |
| 182  | 192   | 211  | 221  | 229  | 238  | 248  | 256  |
| 264  | 269   | 277  | 288  | 294  | 303  | 316  | 327  |
| 336  | 342   | 356  | 372  | 400  | 410  | 417  | 451  |
| 467  | 489   | 522  | 550  | 559  | 592  | 611  | 635  |
| 677  | 709   | 722  | 750  | 774  | 802. | 824  | 842  |
| 887  | 903   | 914  | 926  | 936  | 943  | 947  | 954  |
| 972  | 991   | 1003 | 1010 | 1026 | 1076 | 1084 | 1090 |
| 1108 | 1116  | 1144 | 1160 | 1164 | 1175 | 1211 | 1214 |
| 1217 | 1240  | 1243 | 1270 | 1297 | 1308 | 1309 | 1338 |
| 1349 | 1350  | 1365 | 1372 | 1374 | 1377 | 1384 | 1388 |
| 1390 | 1395  | 1401 | 1439 | 1443 | 1444 | 1446 | 1446 |
| 1452 | 1454  | 1459 | 1461 | 1465 | 1466 | 1468 | 1475 |
| 1477 | 1478  | 1483 | 1532 | 1594 | 1668 | 3030 | 3039 |
| 3042 | 3042  | 3047 | 3050 | 3052 | 3053 | 3082 | 3120 |
| 3121 | 3121  | 3122 | 3125 | 3126 | 3127 | 3134 | 3135 |
| 3136 | 3137  | 3142 | 3152 | 3154 | 3154 | 3177 | 3206 |
| 3626 | -2757 |      |      |      |      |      |      |

### IM2A\_v1

Figure S10. The optimized structure of IM2\_v1.

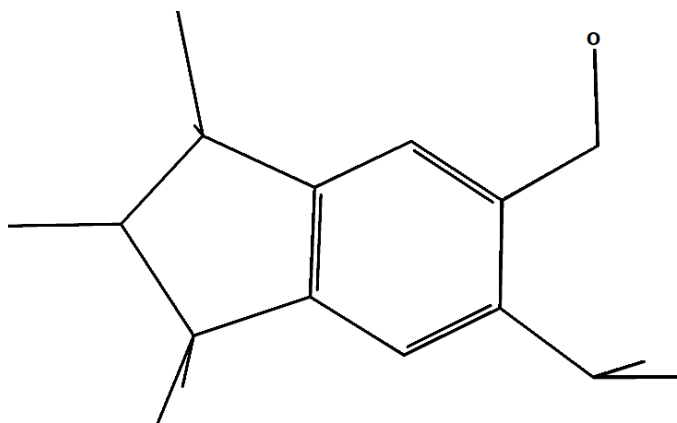

Table S15. Geometry (Å) of IM2\_v1.

| Atom | x        | y        | z        |
|------|----------|----------|----------|
| O    | -3.75965 | 1.581876 | 1.277158 |
| C    | 2.748612 | -0.25027 | -0.43818 |
| C    | 1.801962 | -1.22653 | 0.329522 |
| C    | 2.097665 | 1.168178 | -0.40259 |
| C    | 0.464937 | -0.54562 | 0.173623 |
| C    | 0.62642  | 0.840679 | -0.20826 |
| C    | 4.212214 | -0.30443 | -0.02172 |
| C    | 2.145297 | -1.37206 | 1.824681 |
| C    | 1.832693 | -2.62045 | -0.30618 |
| C    | 2.591376 | 2.046172 | 0.758526 |
| C    | 2.350072 | 1.913622 | -1.71559 |
| C    | -0.82088 | -1.15758 | 0.145428 |
| C    | -0.45799 | 1.627425 | -0.4097  |
| C    | -1.94705 | -0.39982 | -0.04522 |
| C    | -1.76933 | 1.091635 | 0.040907 |
| C    | -3.32236 | -0.95955 | -0.31709 |
| C    | -3.92547 | -0.27714 | -1.55166 |
| C    | -3.35044 | -2.47757 | -0.45561 |
| H    | 2.690497 | -0.56992 | -1.49388 |
| H    | 4.355296 | -0.00564 | 1.026827 |
| H    | 4.613533 | -1.32273 | -0.13788 |
| H    | 4.821297 | 0.365155 | -0.64791 |
| H    | 1.382431 | -1.99391 | 2.317466 |
| H    | 3.121985 | -1.86307 | 1.95636  |
| H    | 2.173599 | -0.40277 | 2.341585 |
| H    | 1.190015 | -3.32468 | 0.243857 |
| H    | 1.494159 | -2.58527 | -1.35252 |
| H    | 2.85732  | -3.02387 | -0.28605 |
| H    | 2.452679 | 1.563963 | 1.73639  |
| H    | 3.658703 | 2.287805 | 0.640901 |
| H    | 2.026652 | 2.990727 | 0.767189 |
| H    | 3.431433 | 2.047683 | -1.87811 |

|   |          |          |          |
|---|----------|----------|----------|
| H | 1.935959 | 1.357585 | -2.56967 |
| H | 1.888698 | 2.913023 | -1.69782 |
| H | -0.88319 | -2.24834 | 0.171043 |
| H | -0.37506 | 2.65299  | -0.78124 |
| H | -3.95344 | -0.66885 | 0.539783 |
| H | -3.31576 | -0.48414 | -2.44591 |
| H | -4.94515 | -0.64709 | -1.73532 |
| H | -2.72807 | -2.80849 | -1.3026  |
| H | -2.98343 | -2.97689 | 0.452904 |
| H | -4.37954 | -2.82055 | -0.63599 |
| H | -3.97101 | 0.811665 | -1.40526 |
| H | -4.07137 | 1.849446 | 2.152184 |
| C | -2.35369 | 1.774174 | 1.248108 |
| H | -2.1003  | 2.8498   | 1.212182 |
| H | -1.881   | 1.354713 | 2.162874 |

Table S16. Frequencies ( $\text{cm}^{-1}$ ) of IM2\_v1.

|      |      |      |      |      |      |      |      |
|------|------|------|------|------|------|------|------|
| 30   | 49   | 67   | 76   | 106  | 122  | 138  | 165  |
| 179  | 218  | 227  | 235  | 243  | 248  | 257  | 259  |
| 266  | 276  | 279  | 297  | 301  | 308  | 331  | 335  |
| 340  | 346  | 369  | 377  | 415  | 427  | 447  | 486  |
| 539  | 553  | 568  | 603  | 636  | 662  | 693  | 703  |
| 746  | 804  | 812  | 833  | 887  | 894  | 916. | 936  |
| 941  | 945  | 947  | 949  | 966  | 990  | 996  | 1003 |
| 1027 | 1067 | 1086 | 1089 | 1092 | 1108 | 1130 | 1148 |
| 1152 | 1169 | 1179 | 1195 | 1211 | 1214 | 1224 | 1237 |
| 1259 | 1280 | 1287 | 1309 | 1315 | 1328 | 1346 | 1356 |
| 1357 | 1366 | 1372 | 1376 | 1383 | 1387 | 1390 | 1399 |
| 1403 | 1433 | 1438 | 1442 | 1444 | 1452 | 1452 | 1456 |
| 1459 | 1460 | 1460 | 1462 | 1465 | 1467 | 1474 | 1477 |
| 1478 | 1553 | 1668 | 2963 | 3031 | 3041 | 3044 | 3046 |
| 3048 | 3048 | 3049 | 3052 | 3055 | 3064 | 3119 | 3124 |
| 3125 | 3127 | 3128 | 3130 | 3132 | 3132 | 3136 | 3137 |
| 3139 | 3140 | 3144 | 3160 | 3185 | 3200 | 3846 |      |

### IM2A\_v2

Figure S11. The optimized structure of IM2\_v2.

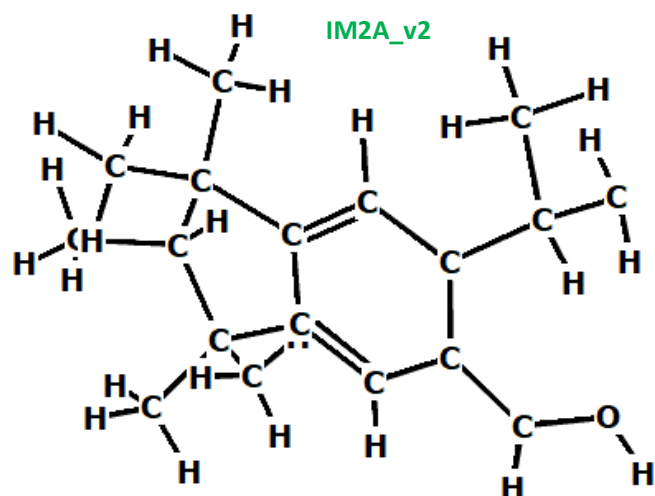

Table S17. Geometry (Å) of IM2\_v2.

| Atom | x        | y        | z        |
|------|----------|----------|----------|
| O    | -2.54262 | 2.896489 | -0.24773 |
| C    | 3.199831 | -0.05769 | -0.44176 |
| C    | 2.346172 | -1.29597 | -0.02029 |
| C    | 2.383797 | 1.222751 | -0.07706 |
| C    | 0.945096 | -0.71199 | -0.01962 |
| C    | 0.966402 | 0.680603 | -0.05263 |
| C    | 4.643796 | -0.06749 | 0.039793 |
| C    | 2.685716 | -1.83851 | 1.37642  |
| C    | 2.499325 | -2.43142 | -1.03631 |
| C    | 2.738125 | 1.815838 | 1.295474 |
| C    | 2.568924 | 2.307923 | -1.14152 |
| C    | -0.27251 | -1.38441 | 0.034724 |
| C    | -0.22899 | 1.392248 | -0.03362 |
| C    | -1.49214 | -0.68958 | 0.054483 |
| C    | -1.45629 | 0.721865 | 0.016357 |
| C    | -2.76699 | -1.52734 | 0.068318 |
| C    | -3.79495 | -1.14584 | 1.140565 |
| C    | -3.40884 | -1.60392 | -1.32309 |
| H    | 3.216002 | -0.08307 | -1.54564 |
| H    | 4.71254  | -0.03895 | 1.13691  |
| H    | 5.1655   | -0.97263 | -0.30718 |
| H    | 5.191698 | 0.802518 | -0.35353 |
| H    | 1.978493 | -2.63854 | 1.644914 |
| H    | 3.701049 | -2.26364 | 1.396832 |
| H    | 2.621018 | -1.06001 | 2.149941 |
| H    | 1.898212 | -3.30733 | -0.74683 |
| H    | 2.179615 | -2.10864 | -2.0384  |
| H    | 3.55118  | -2.7536  | -1.0946  |

|   |          |          |          |
|---|----------|----------|----------|
| H | 2.647106 | 1.074683 | 2.102171 |
| H | 3.766395 | 2.208839 | 1.301057 |
| H | 2.056488 | 2.648977 | 1.526665 |
| H | 3.627912 | 2.6041   | -1.20753 |
| H | 2.246643 | 1.948193 | -2.13005 |
| H | 1.984643 | 3.207747 | -0.89425 |
| H | -0.2917  | -2.47807 | 0.060479 |
| H | -0.23226 | 2.483251 | -0.06621 |
| H | -2.4341  | -2.54789 | 0.3141   |
| H | -3.31119 | -0.93847 | 2.106757 |
| H | -4.49813 | -1.97917 | 1.285922 |
| H | -3.75664 | -0.61839 | -1.66924 |
| H | -2.6909  | -1.98603 | -2.06296 |
| H | -4.27927 | -2.27712 | -1.3056  |
| C | -2.71444 | 1.575892 | 0.040395 |
| H | -3.52128 | 1.167923 | -0.60046 |
| H | -3.17527 | 1.565891 | 1.055929 |
| H | -4.39679 | -0.27105 | 0.857853 |

Table S18. Frequencies (cm<sup>-1</sup>) of IM2\_v2.

|      |      |      |      |      |      |      |      |
|------|------|------|------|------|------|------|------|
| 40   | 60   | 78   | 105  | 135  | 140  | 152  | 177  |
| 217  | 222  | 233  | 242  | 250  | 256  | 259  | 266  |
| 276  | 284  | 293  | 303  | 316  | 321  | 330  | 347  |
| 360  | 398  | 402  | 421  | 463  | 500  | 525  | 549  |
| 553  | 592  | 633  | 656  | 661  | 725  | 745  | 763  |
| 797  | 819  | 836  | 912  | 918  | 928. | 938  | 944  |
| 944  | 948  | 954  | 971  | 990  | 1000 | 1004 | 1026 |
| 1076 | 1088 | 1091 | 1106 | 1130 | 1145 | 1151 | 1158 |
| 1162 | 1191 | 1212 | 1218 | 1236 | 1244 | 1252 | 1294 |
| 1312 | 1319 | 1338 | 1343 | 1349 | 1351 | 1370 | 1372 |
| 1373 | 1380 | 1384 | 1385 | 1389 | 1395 | 1397 | 1440 |
| 1444 | 1448 | 1449 | 1454 | 1455 | 1458 | 1462 | 1463 |
| 1468 | 1470 | 1474 | 1478 | 1478 | 1489 | 1545 | 1660 |
| 1704 | 2952 | 3020 | 3027 | 3041 | 3042 | 3045 | 3048 |
| 3054 | 3056 | 3059 | 3073 | 3121 | 3121 | 3122 | 3125 |
| 3129 | 3131 | 3132 | 3132 | 3134 | 3138 | 3139 | 3149 |
| 3151 | 3155 | 3167 | 3199 |      |      |      |      |

### P3A

Figure S12. The optimized structure of P3A product.



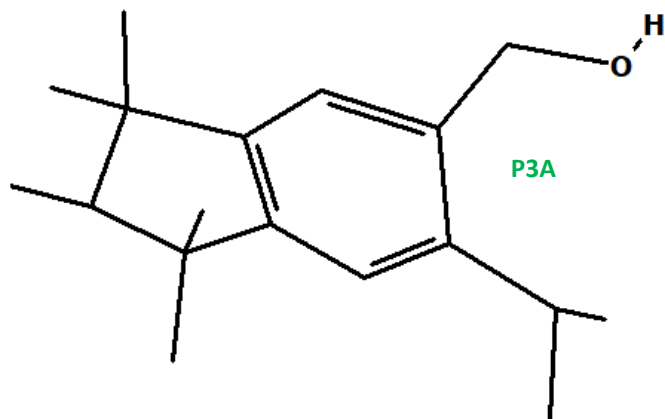

Table S19. Geometry (Å) of P3A product.

| Atom | x        | y        | z        |
|------|----------|----------|----------|
| O    | -3.75965 | 1.581876 | 1.277158 |
| C    | 2.748612 | -0.25027 | -0.43818 |
| C    | 1.801962 | -1.22653 | 0.329522 |
| C    | 2.097665 | 1.168178 | -0.40259 |
| C    | 0.464937 | -0.54562 | 0.173623 |
| C    | 0.62642  | 0.840679 | -0.20826 |
| C    | 4.212214 | -0.30443 | -0.02172 |
| C    | 2.145297 | -1.37206 | 1.824681 |
| C    | 1.832693 | -2.62045 | -0.30618 |
| C    | 2.591376 | 2.046172 | 0.758526 |
| C    | 2.350072 | 1.913622 | -1.71559 |
| C    | -0.82088 | -1.15758 | 0.145428 |
| C    | -0.45799 | 1.627425 | -0.4097  |
| C    | -1.94705 | -0.39982 | -0.04522 |
| C    | -1.76933 | 1.091635 | 0.040907 |
| C    | -3.32236 | -0.95955 | -0.31709 |
| C    | -3.92547 | -0.27714 | -1.55166 |
| C    | -3.35044 | -2.47757 | -0.45561 |
| H    | 2.690497 | -0.56992 | -1.49388 |
| H    | 4.355296 | -0.00564 | 1.026827 |
| H    | 4.613533 | -1.32273 | -0.13788 |
| H    | 4.821297 | 0.365155 | -0.64791 |
| H    | 1.382431 | -1.99391 | 2.317466 |
| H    | 3.121985 | -1.86307 | 1.95636  |
| H    | 2.173599 | -0.40277 | 2.341585 |
| H    | 1.190015 | -3.32468 | 0.243857 |
| H    | 1.494159 | -2.58527 | -1.35252 |
| H    | 2.85732  | -3.02387 | -0.28605 |
| H    | 2.452679 | 1.563963 | 1.73639  |
| H    | 3.658703 | 2.287805 | 0.640901 |
| H    | 2.026652 | 2.990727 | 0.767189 |

|   |          |          |          |
|---|----------|----------|----------|
| H | 3.431433 | 2.047683 | -1.87811 |
| H | 1.935959 | 1.357585 | -2.56967 |
| H | 1.888698 | 2.913023 | -1.69782 |
| H | -0.88319 | -2.24834 | 0.171043 |
| H | -0.37506 | 2.65299  | -0.78124 |
| H | -3.95344 | -0.66885 | 0.539783 |
| H | -3.31576 | -0.48414 | -2.44591 |
| H | -4.94515 | -0.64709 | -1.73532 |
| H | -2.72807 | -2.80849 | -1.3026  |
| H | -2.98343 | -2.97689 | 0.452904 |
| H | -4.37954 | -2.82055 | -0.63599 |
| H | -3.97101 | 0.811665 | -1.40526 |
| H | -4.07137 | 1.849446 | 2.152184 |
| C | -2.35369 | 1.774174 | 1.248108 |
| H | -2.1003  | 2.8498   | 1.212182 |
| H | -1.881   | 1.354713 | 2.162874 |

Table S20. Frequencies (cm<sup>-1</sup>) of P3A product.

|      |      |      |      |      |      |      |      |
|------|------|------|------|------|------|------|------|
| 30   | 49   | 67   | 76   | 106  | 122  | 138  | 165  |
| 179  | 218  | 227  | 235  | 243  | 248  | 257  | 259  |
| 266  | 276  | 279  | 297  | 301  | 308  | 331  | 335  |
| 340  | 346  | 369  | 377  | 415  | 427  | 447  | 486  |
| 539  | 553  | 568  | 603  | 636  | 662  | 693  | 703  |
| 746  | 804  | 812  | 833  | 887  | 894. | 916  | 936  |
| 941  | 945  | 947  | 949  | 966  | 990  | 996  | 1003 |
| 1027 | 1067 | 1086 | 1089 | 1092 | 1108 | 1130 | 1148 |
| 1152 | 1169 | 1179 | 1195 | 1211 | 1214 | 1224 | 1237 |
| 1259 | 1280 | 1287 | 1309 | 1315 | 1328 | 1346 | 1356 |
| 1357 | 1366 | 1372 | 1376 | 1383 | 1387 | 1390 | 1399 |
| 1403 | 1433 | 1438 | 1442 | 1444 | 1452 | 1452 | 1456 |
| 1459 | 1460 | 1460 | 1462 | 1465 | 1467 | 1474 | 1477 |
| 1478 | 1553 | 1668 | 2963 | 3031 | 3041 | 3044 | 3046 |
| 3048 | 3048 | 3049 | 3052 | 3055 | 3064 | 3119 | 3124 |
| 3125 | 3127 | 3128 | 3130 | 3132 | 3132 | 3136 | 3137 |
| 3139 | 3140 | 3144 | 3160 | 3185 | 3200 | 3846 |      |

### TS4A (OH departure)

Figure S13. The optimized structure of TS4A.

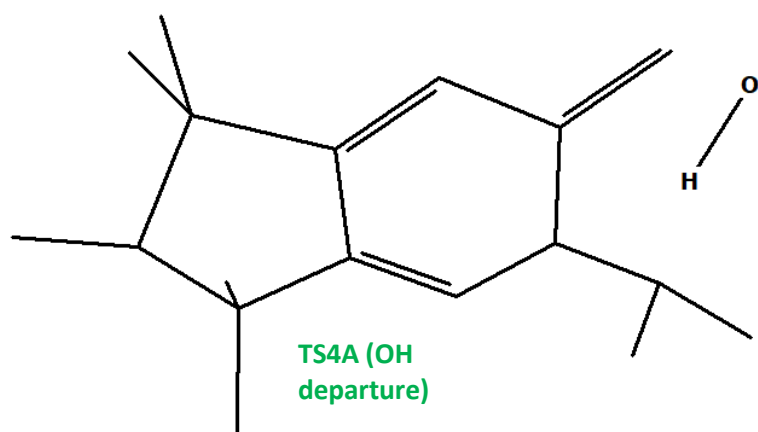

Table S21. Geometry (Å) of TS4A.

| Atom | x        | y        | z        |
|------|----------|----------|----------|
| C    | -2.71202 | 0.026228 | -0.57421 |
| C    | -1.80305 | 1.244763 | -0.21532 |
| C    | -2.06779 | -1.24788 | 0.057598 |
| C    | -0.47398 | 0.580379 | 0.020839 |
| C    | -0.60897 | -0.84581 | 0.166001 |
| C    | -4.19447 | 0.215389 | -0.28475 |
| C    | -2.24365 | 2.002811 | 1.052335 |
| C    | -1.75082 | 2.24303  | -1.37927 |
| C    | -2.60804 | -1.58365 | 1.457616 |
| C    | -2.26349 | -2.46543 | -0.84875 |
| C    | 0.813138 | 1.196784 | 0.093018 |
| C    | 0.478284 | -1.62609 | 0.365486 |
| C    | 1.946201 | 0.464484 | 0.294007 |
| C    | 1.818874 | -1.01868 | 0.497863 |
| C    | 3.324161 | 1.082271 | 0.343035 |
| C    | 3.311665 | 2.597825 | 0.524674 |
| H    | -2.5996  | -0.1039  | -1.66484 |
| H    | -4.39171 | 0.355026 | 0.787741 |
| H    | -4.58538 | 1.095666 | -0.8173  |
| H    | -4.77198 | -0.65905 | -0.62122 |
| H    | -1.50372 | 2.781441 | 1.293174 |
| H    | -3.21415 | 2.496208 | 0.889959 |
| H    | -2.33238 | 1.339596 | 1.923809 |
| H    | -1.11763 | 3.109205 | -1.13377 |
| H    | -1.35307 | 1.76808  | -2.28831 |
| H    | -2.76209 | 2.620616 | -1.5979  |
| H    | -2.50163 | -0.7441  | 2.159011 |
| H    | -3.67171 | -1.86151 | 1.408769 |
| H    | -2.05086 | -2.43812 | 1.870416 |

|   |          |          |          |
|---|----------|----------|----------|
| H | -3.33686 | -2.66806 | -0.98862 |
| H | -1.80996 | -2.29789 | -1.83669 |
| H | -1.80839 | -3.36482 | -0.40662 |
| H | 0.879756 | 2.279976 | -0.02605 |
| H | 0.403439 | -2.71264 | 0.449207 |
| H | 3.838355 | 0.647105 | 1.218628 |
| H | 2.887707 | 3.101194 | -0.35798 |
| H | 2.727246 | 2.897008 | 1.406549 |
| H | 4.340348 | 2.963939 | 0.650786 |
| C | 2.905487 | -1.85316 | 0.717635 |
| H | 2.71767  | -2.85122 | 1.113779 |
| O | 3.178376 | -2.5363  | -1.03243 |
| H | 3.893634 | -1.43929 | 0.908202 |
| H | 2.713959 | -1.87231 | -1.57411 |
| C | 4.134144 | 0.711453 | -0.91181 |
| H | 5.164364 | 1.087423 | -0.82377 |
| H | 4.169889 | -0.37392 | -1.07567 |
| H | 3.672815 | 1.1786   | -1.79661 |

Table S22. Frequencies ( $\text{cm}^{-1}$ ) of TS4A.

|      |      |      |      |      |      |      |      |
|------|------|------|------|------|------|------|------|
| 24   | 58   | 81   | 92   | 110  | 123  | 145  | 160  |
| 185  | 212  | 222  | 235  | 240  | 246  | 257  | 272  |
| 275  | 279  | 290  | 300  | 303  | 321  | 329  | 334  |
| 346  | 359  | 381  | 396  | 416  | 457  | 465  | 499  |
| 514  | 546  | 575  | 593  | 644  | 673  | 691  | 715  |
| 739  | 813  | 821  | 829  | 858  | 893. | 898  | 905  |
| 927  | 933  | 943  | 946  | 949  | 963  | 972  | 991  |
| 1000 | 1002 | 1012 | 1023 | 1075 | 1086 | 1091 | 1112 |
| 1136 | 1143 | 1147 | 1182 | 1209 | 1213 | 1233 | 1242 |
| 1268 | 1281 | 1301 | 1318 | 1342 | 1348 | 1353 | 1365 |
| 1369 | 1373 | 1376 | 1385 | 1388 | 1391 | 1394 | 1400 |
| 1411 | 1437 | 1444 | 1444 | 1455 | 1455 | 1458 | 1460 |
| 1463 | 1465 | 1466 | 1469 | 1477 | 1478 | 1488 | 1537 |
| 1618 | 1718 | 3036 | 3042 | 3044 | 3046 | 3047 | 3048 |
| 3051 | 3052 | 3056 | 3123 | 3124 | 3126 | 3129 | 3129 |
| 3129 | 3129 | 3131 | 3136 | 3142 | 3144 | 3148 | 3150 |
| 3155 | 3168 | 3201 | 3210 | 3270 | 3749 | -824 |      |

## P4A

Figure S14. The optimized structure of P4A.

Table S23. Geometry (Å) of P4A.

| Atom | x        | y        | z        |
|------|----------|----------|----------|
| C    | -2.78837 | 0.164683 | -0.62265 |
| C    | -1.8026  | 1.300645 | -0.20322 |
| C    | -2.18286 | -1.18779 | -0.13253 |
| C    | -0.49701 | 0.539507 | -0.08152 |
| C    | -0.70598 | -0.8439  | -0.04438 |
| C    | -4.24568 | 0.399411 | -0.25052 |
| C    | -2.15127 | 1.961978 | 1.140148 |
| C    | -1.7395  | 2.389149 | -1.27939 |
| C    | -2.69752 | -1.63561 | 1.244241 |
| C    | -2.45609 | -2.30467 | -1.14325 |
| C    | 0.797726 | 1.058818 | 0.017348 |
| C    | 0.369815 | -1.70285 | 0.084166 |
| C    | 1.904732 | 0.222404 | 0.141923 |
| C    | 1.701378 | -1.20193 | 0.175671 |
| C    | 3.313217 | 0.788427 | 0.195176 |
| C    | 3.377398 | 2.244295 | 0.656001 |
| H    | -2.72761 | 0.124272 | -1.72456 |
| H    | -4.39031 | 0.455543 | 0.838238 |
| H    | -4.61325 | 1.341002 | -0.68674 |
| H    | -4.88208 | -0.41298 | -0.63307 |
| H    | -1.36013 | 2.675458 | 1.417801 |
| H    | -3.09858 | 2.518298 | 1.06992  |
| H    | -2.24078 | 1.227429 | 1.952784 |
| H    | -1.04557 | 3.193496 | -0.98961 |
| H    | -1.40481 | 1.973223 | -2.24154 |
| H    | -2.73341 | 2.841775 | -1.42349 |
| H    | -2.55718 | -0.86121 | 2.011834 |
| H    | -3.76796 | -1.88877 | 1.200521 |
| H    | -2.15031 | -2.53382 | 1.569616 |
| H    | -3.54035 | -2.45558 | -1.26555 |
| H    | -2.02724 | -2.06004 | -2.12657 |
| H    | -2.02264 | -3.25895 | -0.80565 |
| H    | 0.939023 | 2.141434 | -0.00559 |
| H    | 0.218912 | -2.78564 | 0.116629 |
| H    | 3.881185 | 0.191553 | 0.927142 |
| H    | 2.940585 | 2.923391 | -0.09197 |
| H    | 2.845486 | 2.392734 | 1.607025 |
| H    | 4.426066 | 2.542827 | 0.796792 |
| C    | 2.765021 | -2.12208 | 0.299692 |
| H    | 2.550544 | -3.19057 | 0.321837 |
| H    | 3.804514 | -1.81373 | 0.382732 |
| C    | 3.998589 | 0.641791 | -1.17153 |
| H    | 5.041761 | 0.988835 | -1.12181 |
| H    | 3.995532 | -0.4021  | -1.51651 |

|   |          |          |          |
|---|----------|----------|----------|
| H | 3.469155 | 1.250274 | -1.92192 |
|---|----------|----------|----------|

Table S24. Frequencies ( $\text{cm}^{-1}$ ) of P4A.

|      |      |      |      |      |      |      |      |
|------|------|------|------|------|------|------|------|
| 45   | 63   | 92   | 115  | 140  | 147  | 202  | 216  |
| 224  | 234  | 239  | 249  | 255  | 267  | 276  | 282  |
| 298  | 303  | 310  | 324  | 328  | 349  | 357  | 383  |
| 408  | 418  | 452  | 480  | 511  | 517  | 536  | 551  |
| 582  | 603  | 654  | 704  | 721  | 739  | 763  | 786  |
| 822  | 841  | 909  | 911  | 922  | 933. | 938  | 944  |
| 948  | 955  | 971  | 987  | 994  | 1002 | 1019 | 1027 |
| 1083 | 1090 | 1107 | 1116 | 1148 | 1159 | 1163 | 1210 |
| 1215 | 1218 | 1227 | 1243 | 1272 | 1297 | 1313 | 1320 |
| 1335 | 1349 | 1352 | 1367 | 1372 | 1372 | 1380 | 1384 |
| 1390 | 1395 | 1397 | 1436 | 1437 | 1440 | 1446 | 1448 |
| 1454 | 1455 | 1458 | 1462 | 1464 | 1466 | 1468 | 1474 |
| 1479 | 1480 | 1486 | 1526 | 1598 | 1661 | 3033 | 3037 |
| 3041 | 3046 | 3047 | 3053 | 3058 | 3058 | 3063 | 3119 |
| 3121 | 3125 | 3127 | 3128 | 3130 | 3130 | 3135 | 3138 |
| 3138 | 3138 | 3143 | 3143 | 3154 | 3187 | 3192 | 3214 |
| 3295 |      |      |      |      |      |      |      |

### TS5A

Figure S15. The optimized structure of TS5A transition state.

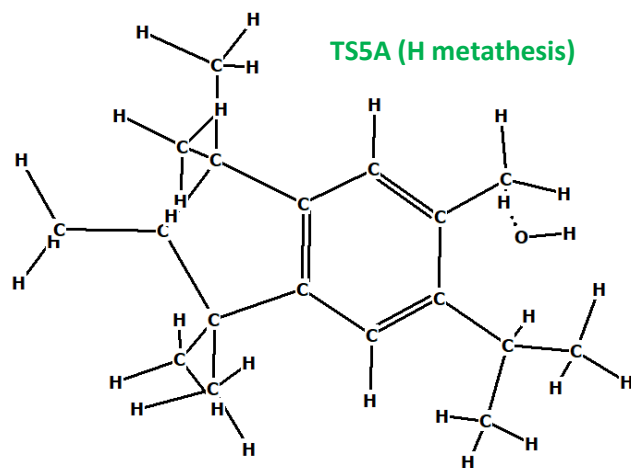

Table S25. Geometry ( $\text{\AA}$ ) of TS5A transition state.

| Atom | x        | y        | z        |
|------|----------|----------|----------|
| C    | -2.73451 | -0.05678 | -0.94338 |
| C    | -2.01603 | 0.877113 | 0.081023 |
| C    | -1.88832 | -1.36273 | -1.06209 |

|   |          |          |          |
|---|----------|----------|----------|
| C | -0.58847 | 0.366034 | 0.006369 |
| C | -0.51783 | -0.87305 | -0.62865 |
| C | -4.22356 | -0.26357 | -0.70373 |
| C | -2.54357 | 0.747376 | 1.518278 |
| C | -2.12857 | 2.342545 | -0.34915 |
| C | -2.35728 | -2.49321 | -0.13319 |
| C | -1.88846 | -1.88203 | -2.50245 |
| C | 0.566484 | 0.967245 | 0.504968 |
| C | 0.712338 | -1.50793 | -0.7696  |
| C | 1.813044 | 0.346476 | 0.367223 |
| C | 1.885197 | -0.9051  | -0.29083 |
| C | 3.08083  | 1.015226 | 0.874281 |
| C | 2.855708 | 1.901353 | 2.100105 |
| H | -2.62134 | 0.447815 | -1.91918 |
| H | -4.42343 | -0.7625  | 0.255718 |
| H | -4.75537 | 0.700355 | -0.69663 |
| H | -4.666   | -0.87968 | -1.50152 |
| H | -1.92981 | 1.361788 | 2.195102 |
| H | -3.58288 | 1.103354 | 1.587506 |
| H | -2.50799 | -0.28937 | 1.881855 |
| H | -1.61871 | 3.006067 | 0.366435 |
| H | -1.68259 | 2.497549 | -1.34288 |
| H | -3.18602 | 2.648283 | -0.39169 |
| H | -2.4077  | -2.17209 | 0.916895 |
| H | -3.35141 | -2.8601  | -0.43161 |
| H | -1.65312 | -3.33752 | -0.19362 |
| H | -2.91477 | -2.12013 | -2.8239  |
| H | -1.47465 | -1.13096 | -3.19192 |
| H | -1.28945 | -2.80153 | -2.59278 |
| H | 0.495978 | 1.934459 | 1.008073 |
| H | 0.77991  | -2.48088 | -1.26496 |
| H | 3.773944 | 0.215612 | 1.174877 |
| H | 2.277093 | 2.803352 | 1.848106 |
| H | 2.32071  | 1.361591 | 2.895127 |
| H | 3.82365  | 2.236452 | 2.500318 |
| C | 3.733969 | 1.831618 | -0.24989 |
| H | 4.684064 | 2.271029 | 0.089979 |
| H | 3.937192 | 1.217031 | -1.13912 |
| H | 3.06472  | 2.651996 | -0.55452 |
| C | 3.188468 | -1.61652 | -0.46206 |
| H | 3.094321 | -2.52014 | -1.07711 |
| H | 3.995967 | -0.98228 | -0.85063 |
| O | 4.359785 | -2.11336 | 1.833218 |
| H | 5.221614 | -1.90267 | 1.41998  |
| H | 3.561367 | -1.97551 | 0.575283 |

---

Table S26. Frequencies (cm<sup>-1</sup>) of TS5A transition state.

|      |      |      |      |      |      |      |      |
|------|------|------|------|------|------|------|------|
| 38   | 48   | 76   | 83   | 101  | 117  | 142  | 148  |
| 192  | 208  | 209  | 236  | 239  | 251  | 255  | 262  |
| 267  | 274  | 289  | 291  | 297  | 312  | 321  | 332  |
| 335  | 349  | 354  | 377  | 408  | 415  | 469  | 493  |
| 519  | 525  | 552  | 580  | 603  | 649  | 687  | 723  |
| 734  | 762  | 792  | 823  | 836  | 908. | 914  | 917  |
| 928  | 936  | 947  | 948  | 955  | 967  | 983  | 993  |
| 1004 | 1007 | 1026 | 1063 | 1083 | 1091 | 1092 | 1107 |
| 1133 | 1148 | 1157 | 1162 | 1203 | 1212 | 1217 | 1243 |
| 1251 | 1253 | 1296 | 1314 | 1329 | 1342 | 1349 | 1352 |
| 1356 | 1369 | 1374 | 1376 | 1386 | 1388 | 1389 | 1396 |
| 1404 | 1433 | 1440 | 1444 | 1444 | 1447 | 1455 | 1456 |
| 1457 | 1461 | 1462 | 1466 | 1469 | 1476 | 1479 | 1481 |
| 1489 | 1539 | 1642 | 1682 | 1718 | 3040 | 3042 | 3044 |
| 3046 | 3047 | 3049 | 3052 | 3055 | 3102 | 3108 | 3119 |
| 3120 | 3120 | 3125 | 3126 | 3130 | 3132 | 3135 | 3137 |
| 3138 | 3140 | 3142 | 3142 | 3154 | 3178 | 3183 | 3196 |
| 3718 | -789 |      |      |      |      |      |      |

### Product P5 (G1)

Figure S16. The optimized structure of product P5(G1).

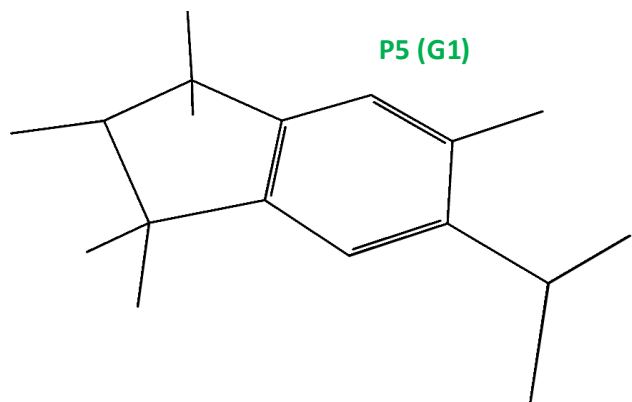

Table S27. Geometry (Å) of product P5(G1).

| Atom | x        | y        | z        |
|------|----------|----------|----------|
| C    | 2.836752 | -0.16229 | -0.51394 |
| C    | 1.856574 | -1.30591 | -0.10301 |
| C    | 2.195129 | 1.188964 | -0.06761 |



|   |          |          |          |
|---|----------|----------|----------|
| C | 0.535086 | -0.56081 | -0.03557 |
| C | 0.723538 | 0.819207 | -0.01157 |
| C | 4.286233 | -0.366   | -0.09531 |
| C | 2.174194 | -1.93358 | 1.263149 |
| C | 1.844391 | -2.41594 | -1.15773 |
| C | 2.667304 | 1.676268 | 1.310878 |
| C | 2.474273 | 2.288768 | -1.09581 |
| C | -0.75279 | -1.08996 | 0.028616 |
| C | -0.37738 | 1.668377 | 0.07874  |
| C | -1.86988 | -0.24904 | 0.112954 |
| C | -1.67719 | 1.151492 | 0.138866 |
| C | -3.27628 | -0.82807 | 0.113207 |
| C | -3.81092 | -0.90588 | -1.32387 |
| C | -3.37972 | -2.19718 | 0.786366 |
| H | 2.808043 | -0.14295 | -1.61778 |
| H | 4.400349 | -0.39941 | 0.998068 |
| H | 4.682117 | -1.30923 | -0.50239 |
| H | 4.920621 | 0.449687 | -0.47443 |
| H | 1.385171 | -2.65281 | 1.53225  |
| H | 3.131253 | -2.47682 | 1.234463 |
| H | 2.228038 | -1.18089 | 2.06237  |
| H | 1.153758 | -3.22519 | -0.87324 |
| H | 1.533451 | -2.02496 | -2.13821 |
| H | 2.848728 | -2.85642 | -1.26234 |
| H | 2.522383 | 0.915871 | 2.091452 |
| H | 3.733551 | 1.949497 | 1.288138 |
| H | 2.09523  | 2.57051  | 1.603    |
| H | 3.55846  | 2.457125 | -1.19466 |
| H | 2.075108 | 2.01454  | -2.08393 |
| H | 2.01521  | 3.242134 | -0.79077 |
| H | -0.89126 | -2.17369 | 0.009978 |
| H | -0.23663 | 2.753062 | 0.100181 |
| H | -3.92223 | -0.13661 | 0.675983 |
| H | -3.19943 | -1.60812 | -1.91286 |
| H | -4.85189 | -1.26311 | -1.33553 |
| H | -2.87135 | -2.97633 | 0.197973 |
| H | -2.93861 | -2.18643 | 1.793882 |
| H | -4.43565 | -2.49175 | 0.873938 |
| H | -3.77572 | 0.073015 | -1.82425 |
| C | -2.84624 | 2.101351 | 0.243528 |
| H | -3.59313 | 1.924239 | -0.5441  |
| H | -3.3666  | 1.992146 | 1.208037 |
| H | -2.50548 | 3.141529 | 0.161053 |

Table S28. Frequencies ( $\text{cm}^{-1}$ ) of product P5(G1).

|      |      |      |      |      |      |      |      |
|------|------|------|------|------|------|------|------|
| 43   | 63   | 86   | 112  | 140  | 147  | 200  | 209  |
| 219  | 225  | 235  | 243  | 254  | 259  | 267  | 269  |
| 278  | 288  | 293  | 302  | 323  | 328  | 349  | 356  |
| 379  | 407  | 414  | 466  | 493  | 517  | 526  | 552  |
| 582  | 604  | 652  | 703  | 726  | 754  | 789  | 823  |
| 835  | 907  | 917  | 920  | 929  | 938  | 944  | 947  |
| 957  | 969  | 992  | 1002 | 1003 | 1017 | 1027 | 1046 |
| 1082 | 1090 | 1106 | 1127 | 1146 | 1158 | 1162 | 1198 |
| 1212 | 1218 | 1242 | 1248 | 1258 | 1297 | 1324 | 1329 |
| 1343 | 1349 | 1354 | 1370 | 1371 | 1374 | 1380 | 1384 |
| 1389 | 1391 | 1397 | 1398 | 1437 | 1440 | 1441 | 1445 |
| 1446 | 1451 | 1454 | 1457 | 1460 | 1461 | 1463 | 1465 |
| 1467 | 1473 | 1476 | 1480 | 1492 | 1547 | 1658 | 1704 |
| 3029 | 3038 | 3040 | 3044 | 3048 | 3050 | 3052 | 3058 |
| 3060 | 3075 | 3119 | 3119 | 3122 | 3125 | 3126 | 3129 |
| 3129 | 3130 | 3133 | 3133 | 3134 | 3139 | 3140 | 3144 |
| 3156 | 3161 | 3186 | 3205 |      |      |      |      |

## P2

Figure S17. The optimized structure of product P2.

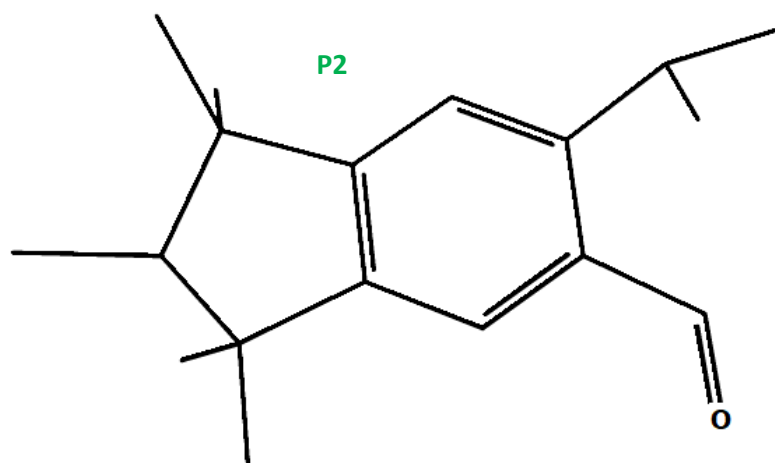

Table S29. Geometry (Å) of product P2.

| Atom | x        | y        | z        |
|------|----------|----------|----------|
| O    | 2.900736 | -2.918   | 0.017497 |
| C    | -2.84696 | 0.10619  | -0.47927 |
| C    | -1.96189 | 1.300404 | -0.00067 |
| C    | -2.08672 | -1.21224 | -0.13072 |
| C    | -0.58189 | 0.671238 | 0.016897 |

|   |          |          |          |
|---|----------|----------|----------|
| C | -0.65218 | -0.72306 | -0.05641 |
| C | -4.30119 | 0.155141 | -0.03296 |
| C | -2.31181 | 1.811161 | 1.405906 |
| C | -2.04887 | 2.470878 | -0.98436 |
| C | -2.4949  | -1.82957 | 1.215925 |
| C | -2.28077 | -2.26033 | -1.23009 |
| C | 0.650057 | 1.313038 | 0.118574 |
| C | 0.515904 | -1.4699  | -0.03085 |
| C | 1.842769 | 0.579234 | 0.14605  |
| C | 1.761839 | -0.82949 | 0.064937 |
| C | 3.160564 | 1.341718 | 0.227558 |
| C | 4.039544 | 0.885722 | 1.348853 |
| C | 3.892413 | 1.358997 | -1.12315 |
| H | -2.8336  | 0.16318  | -1.58188 |
| H | -4.39879 | 0.098815 | 1.060792 |
| H | -4.78109 | 1.087671 | -0.36713 |
| H | -4.86889 | -0.68311 | -0.46487 |
| H | -1.58483 | 2.578339 | 1.713789 |
| H | -3.31241 | 2.269481 | 1.41555  |
| H | -2.29138 | 1.007861 | 2.155871 |
| H | -1.42961 | 3.317948 | -0.6515  |
| H | -1.71313 | 2.168654 | -1.98748 |
| H | -3.08839 | 2.826912 | -1.05911 |
| H | -2.3977  | -1.11585 | 2.046184 |
| H | -3.53627 | -2.18439 | 1.184617 |
| H | -1.84988 | -2.69344 | 1.438856 |
| H | -3.34746 | -2.51558 | -1.33063 |
| H | -1.92027 | -1.88545 | -2.19945 |
| H | -1.73582 | -3.18713 | -0.99327 |
| H | 0.697861 | 2.403741 | 0.179468 |
| H | 0.501982 | -2.56055 | -0.08786 |
| H | 2.875957 | 2.391836 | 0.438639 |
| H | 3.599656 | 0.629368 | 2.314079 |
| H | 5.11495  | 1.064347 | 1.297931 |
| H | 4.197748 | 0.347361 | -1.42945 |
| H | 3.241708 | 1.770664 | -1.90744 |
| H | 4.795109 | 1.983714 | -1.05731 |
| C | 2.962814 | -1.70635 | 0.066443 |
| H | 3.950157 | -1.20187 | 0.119156 |

Table S30. Frequencies (cm<sup>-1</sup>) of product P2.

|     |     |     |     |     |     |     |     |
|-----|-----|-----|-----|-----|-----|-----|-----|
| 43  | 56  | 65  | 100 | 136 | 142 | 150 | 185 |
| 205 | 221 | 232 | 235 | 244 | 254 | 258 | 264 |
| 274 | 276 | 288 | 303 | 312 | 324 | 330 | 348 |
| 363 | 395 | 407 | 421 | 484 | 492 | 514 | 533 |

|      |      |      |      |      |      |      |      |
|------|------|------|------|------|------|------|------|
| 553  | 575  | 598  | 649  | 672  | 712  | 724  | 788  |
| 793  | 822  | 845  | 910  | 924  | 937  | 943  | 945  |
| 951  | 952  | 957  | 991  | 1002 | 1005 | 1025 | 1026 |
| 1044 | 1090 | 1104 | 1112 | 1153 | 1158 | 1161 | 1189 |
| 1208 | 1216 | 1222 | 1243 | 1250 | 1293 | 1300 | 1312 |
| 1344 | 1351 | 1354 | 1371 | 1373 | 1374 | 1379 | 1385 |
| 1390 | 1396 | 1426 | 1434 | 1440 | 1444 | 1448 | 1451 |
| 1455 | 1459 | 1462 | 1463 | 1464 | 1468 | 1477 | 1478 |
| 1482 | 1538 | 1650 | 1696 | 1812 | 2994 | 3032 | 3043 |
| 3044 | 3048 | 3051 | 3053 | 3056 | 3060 | 3122 | 3124 |
| 3125 | 3128 | 3132 | 3132 | 3136 | 3140 | 3143 | 3144 |
| 3150 | 3152 | 3157 | 3181 | 3198 | 3271 |      |      |

### TS3

Figure S18. The optimized structure of transition state TS3.

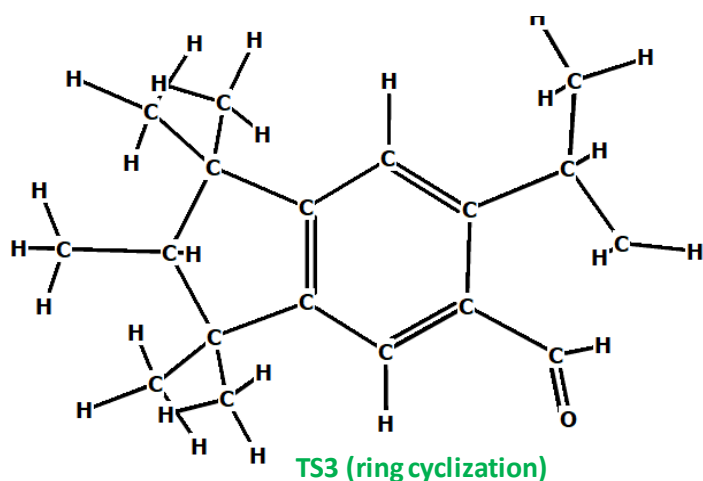

Table S31. Geometry (Å) of transition state TS3.

| Atom | x        | y        | z        |
|------|----------|----------|----------|
| O    | 2.067804 | -0.21576 | -3.92122 |
| C    | -2.74385 | 0.530361 | 0.655987 |
| C    | -1.46547 | 0.42881  | 1.546021 |
| C    | -2.43715 | -0.19713 | -0.69082 |
| C    | -0.38105 | 0.21896  | 0.504512 |
| C    | -0.92156 | -0.1279  | -0.73715 |
| C    | -4.0423  | 0.118862 | 1.33572  |
| C    | -1.47978 | -0.75711 | 2.523603 |
| C    | -1.25792 | 1.718377 | 2.345331 |
| C    | -2.89251 | -1.66456 | -0.72275 |
| C    | -3.08371 | 0.540732 | -1.86671 |
| C    | 1.000477 | 0.333423 | 0.680393 |

|   |          |          |          |
|---|----------|----------|----------|
| C | -0.08604 | -0.37629 | -1.82583 |
| C | 1.840746 | 0.075366 | -0.40166 |
| C | 1.293323 | -0.2896  | -1.63991 |
| C | 3.354083 | 0.216134 | -0.41807 |
| C | 2.269145 | -0.57017 | -2.74763 |
| C | 3.713878 | 0.597206 | -1.82954 |
| C | 3.893339 | 1.234755 | 0.592223 |
| H | -2.82749 | 1.599582 | 0.393312 |
| H | -4.03657 | -0.94268 | 1.621649 |
| H | -4.21116 | 0.713129 | 2.246767 |
| H | -4.9015  | 0.283926 | 0.6678   |
| H | -0.50951 | -0.82351 | 3.039751 |
| H | -2.26092 | -0.62508 | 3.28783  |
| H | -1.65389 | -1.71454 | 2.012262 |
| H | -0.36166 | 1.653601 | 2.981381 |
| H | -1.14527 | 2.583471 | 1.674968 |
| H | -2.12104 | 1.900656 | 3.00495  |
| H | -2.4808  | -2.2459  | 0.114441 |
| H | -3.99035 | -1.73492 | -0.68625 |
| H | -2.55492 | -2.13749 | -1.65792 |
| H | -4.17813 | 0.569115 | -1.74501 |
| H | -2.71519 | 1.575287 | -1.93248 |
| H | -2.8666  | 0.034451 | -2.82001 |
| H | 1.412111 | 0.639263 | 1.645041 |
| H | -0.48584 | -0.63823 | -2.80855 |
| H | 3.806063 | -0.76569 | -0.19378 |
| H | 3.365414 | 1.577458 | -2.17111 |
| H | 4.660151 | 0.256284 | -2.25589 |
| H | 3.425413 | 2.218095 | 0.435964 |
| H | 3.684779 | 0.908362 | 1.621064 |
| H | 4.981584 | 1.342416 | 0.486539 |
| H | 2.959806 | -1.42314 | -2.54561 |

Table S32. Frequencies (cm<sup>-1</sup>) of transition state TS3.

|      |      |      |      |      |      |      |      |
|------|------|------|------|------|------|------|------|
| 46   | 61   | 98   | 110  | 134  | 146  | 181  | 219  |
| 222  | 234  | 242  | 248  | 259  | 268  | 270  | 279  |
| 291  | 308  | 328  | 333  | 342  | 357  | 373  | 394  |
| 416  | 426  | 486  | 508  | 531  | 544  | 556  | 590  |
| 616  | 636  | 656  | 712  | 729  | 780  | 798  | 821  |
| 836  | 881  | 911  | 915  | 926  | 937  | 941  | 942  |
| 946  | 952  | 986  | 991  | 1004 | 1009 | 1027 | 1056 |
| 1090 | 1099 | 1113 | 1142 | 1158 | 1160 | 1169 | 1206 |
| 1214 | 1226 | 1240 | 1243 | 1292 | 1307 | 1312 | 1349 |
| 1349 | 1351 | 1361 | 1373 | 1374 | 1376 | 1378 | 1385 |

|      |      |      |      |      |      |      |      |
|------|------|------|------|------|------|------|------|
| 1389 | 1395 | 1436 | 1439 | 1444 | 1446 | 1450 | 1453 |
| 1456 | 1458 | 1460 | 1463 | 1466 | 1473 | 1476 | 1488 |
| 1530 | 1599 | 1664 | 1696 | 2942 | 3038 | 3040 | 3043 |
| 3048 | 3050 | 3052 | 3054 | 3061 | 3117 | 3121 | 3125 |
| 3128 | 3129 | 3137 | 3137 | 3138 | 3140 | 3142 | 3144 |
| 3149 | 3160 | 3184 | 3187 | 3252 | -411 |      |      |

### P3

Figure S19. The optimized structure of product P3.

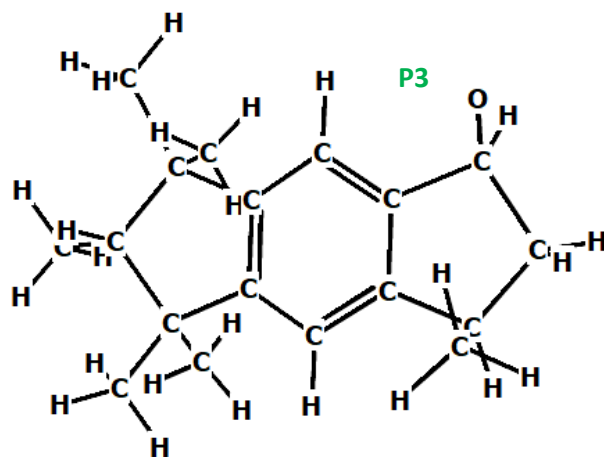

Table S33. Geometry (Å) of product P3.

| Atom | x        | y        | z        |
|------|----------|----------|----------|
| O    | 3.642455 | -1.79291 | -0.80479 |
| C    | -2.79174 | 0.045791 | -0.52114 |
| C    | -1.97022 | 1.283674 | -0.04279 |
| C    | -2.00762 | -1.23247 | -0.08857 |
| C    | -0.5701  | 0.704135 | 0.059058 |
| C    | -0.59242 | -0.69699 | 0.03809  |
| C    | -4.26712 | 0.060921 | -0.14632 |
| C    | -2.40714 | 1.827132 | 1.326712 |
| C    | -2.05183 | 2.418543 | -1.06765 |
| C    | -2.46727 | -1.81961 | 1.255298 |
| C    | -2.11562 | -2.32274 | -1.15876 |
| C    | 0.631053 | 1.40408  | 0.18532  |
| C    | 0.588714 | -1.43087 | 0.151982 |
| C    | 1.812728 | 0.671485 | 0.30485  |
| C    | 1.781228 | -0.72606 | 0.298607 |
| C    | 3.240432 | 1.181123 | 0.371916 |
| C    | 3.201505 | -1.26186 | 0.386058 |
| C    | 4.007128 | -0.04891 | 0.901162 |

|   |          |          |          |
|---|----------|----------|----------|
| C | 3.728858 | 1.590227 | -1.02084 |
| H | -2.72609 | 0.065382 | -1.62326 |
| H | -4.41318 | 0.038406 | 0.943109 |
| H | -4.7594  | 0.965876 | -0.53413 |
| H | -4.78729 | -0.80952 | -0.57461 |
| H | -1.72256 | 2.629563 | 1.642546 |
| H | -3.42251 | 2.249181 | 1.275507 |
| H | -2.39411 | 1.049885 | 2.104024 |
| H | -1.47384 | 3.295407 | -0.73705 |
| H | -1.66175 | 2.095504 | -2.04443 |
| H | -3.09718 | 2.739651 | -1.20026 |
| H | -2.4393  | -1.07681 | 2.065165 |
| H | -3.49286 | -2.21254 | 1.181276 |
| H | -1.80649 | -2.65266 | 1.541119 |
| H | -3.16833 | -2.61232 | -1.30563 |
| H | -1.71555 | -1.97021 | -2.12108 |
| H | -1.55944 | -3.22566 | -0.86272 |
| H | 0.648525 | 2.497556 | 0.18881  |
| H | 0.58205  | -2.52401 | 0.133274 |
| H | 3.327539 | 2.035366 | 1.059013 |
| H | 5.048985 | -0.09502 | 0.556669 |
| H | 3.996899 | -0.05477 | 2.000024 |
| H | 3.707958 | 0.715715 | -1.69293 |
| H | 3.08732  | 2.37104  | -1.45492 |
| H | 4.761161 | 1.96736  | -0.97869 |
| H | 3.27901  | -2.12778 | 1.081396 |

Table S34. Frequencies (cm<sup>-1</sup>) of product P3.

|      |      |      |      |      |      |      |      |
|------|------|------|------|------|------|------|------|
| 53   | 59   | 103  | 124  | 142  | 158  | 176  | 225  |
| 230  | 242  | 244  | 262  | 269  | 272  | 277  | 290  |
| 296  | 320  | 329  | 336  | 352  | 377  | 383  | 417  |
| 427  | 474  | 516  | 549  | 551  | 586  | 602  | 682  |
| 704  | 710  | 718  | 777  | 792  | 816  | 826  | 848  |
| 895  | 905  | 920  | 933  | 935  | 941  | 943  | 952  |
| 956  | 989  | 1004 | 1010 | 1027 | 1027 | 1061 | 1088 |
| 1090 | 1096 | 1100 | 1138 | 1152 | 1162 | 1194 | 1203 |
| 1206 | 1216 | 1230 | 1244 | 1260 | 1271 | 1292 | 1312 |
| 1326 | 1350 | 1352 | 1360 | 1363 | 1374 | 1376 | 1380 |
| 1386 | 1389 | 1395 | 1436 | 1439 | 1443 | 1446 | 1451 |
| 1454 | 1456 | 1458 | 1460 | 1462 | 1467 | 1473 | 1476 |
| 1491 | 1527 | 1668 | 1699 | 2963 | 3037 | 3039 | 3041 |
| 3044 | 3045 | 3046 | 3050 | 3073 | 3087 | 3120 | 3120 |
| 3121 | 3122 | 3124 | 3126 | 3134 | 3135 | 3136 | 3140 |
| 3141 | 3143 | 3146 | 3168 | 3173 |      |      |      |

### Transition State TS4

Figure S20. The optimized structure of TS4 transition state.

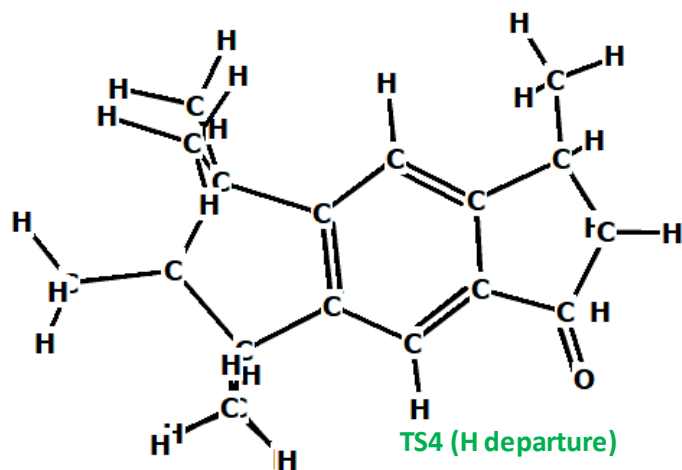

Table S35. Geometry (Å) of TS4 transition state.

| Atom | x        | y        | z        |
|------|----------|----------|----------|
| O    | 3.403172 | -2.46211 | 0.188937 |
| C    | -2.80431 | 0.175264 | -0.69901 |
| C    | -1.94439 | 1.405243 | -0.27144 |
| C    | -2.06475 | -1.10742 | -0.20717 |
| C    | -0.56426 | 0.788434 | -0.1359  |
| C    | -0.63297 | -0.61509 | -0.09812 |
| C    | -4.27948 | 0.255607 | -0.33303 |
| C    | -2.36482 | 2.022974 | 1.071823 |
| C    | -1.98446 | 2.495715 | -1.34616 |
| C    | -2.54329 | -1.61671 | 1.161739 |
| C    | -2.2067  | -2.24112 | -1.22696 |
| C    | 0.653767 | 1.464102 | -0.03498 |
| C    | 0.522735 | -1.37671 | 0.041338 |
| C    | 1.815469 | 0.70561  | 0.106828 |
| C    | 1.734487 | -0.69116 | 0.136449 |
| C    | 3.250939 | 1.179418 | 0.261922 |
| C    | 3.112712 | -1.26511 | 0.230883 |
| C    | 4.073674 | -0.09352 | -0.00818 |
| C    | 3.619846 | 2.36061  | -0.62789 |
| H    | -2.73365 | 0.144178 | -1.80046 |
| H    | -4.43131 | 0.288977 | 0.755352 |
| H    | -4.74071 | 1.156401 | -0.7659  |
| H    | -4.8252  | -0.61681 | -0.72354 |



|   |          |          |          |
|---|----------|----------|----------|
| H | -1.6567  | 2.817873 | 1.352341 |
| H | -3.3665  | 2.472984 | 0.997646 |
| H | -2.37668 | 1.282282 | 1.883814 |
| H | -1.38215 | 3.368732 | -1.0513  |
| H | -1.60077 | 2.11777  | -2.30548 |
| H | -3.01914 | 2.841158 | -1.49798 |
| H | -2.48947 | -0.83957 | 1.937167 |
| H | -3.58183 | -1.97657 | 1.103818 |
| H | -1.91174 | -2.45822 | 1.485797 |
| H | -3.26851 | -2.50013 | -1.36377 |
| H | -1.79253 | -1.94708 | -2.20274 |
| H | -1.6826  | -3.14776 | -0.88735 |
| H | 0.692129 | 2.555742 | -0.06738 |
| H | 0.503405 | -2.469   | 0.065682 |
| H | 3.393774 | 1.472005 | 1.317781 |
| H | 4.341318 | -0.14489 | -1.07826 |
| H | 4.996868 | -0.1787  | 0.577062 |
| H | 3.457972 | 2.109523 | -1.68735 |
| H | 3.01376  | 3.245748 | -0.38744 |
| H | 4.67749  | 2.629137 | -0.49367 |
| H | 3.04282  | -1.00494 | 1.872633 |

Table S36. Frequencies (cm<sup>-1</sup>) of TS4 transition state.

|      |      |      |      |      |      |      |      |
|------|------|------|------|------|------|------|------|
| 45   | 63   | 104  | 106  | 133  | 152  | 183  | 222  |
| 224  | 239  | 240  | 250  | 254  | 262  | 273  | 282  |
| 296  | 310  | 330  | 332  | 346  | 348  | 382  | 389  |
| 402  | 459  | 504  | 511  | 542  | 551  | 554  | 579  |
| 588  | 600  | 631  | 651  | 710  | 729  | 764  | 794  |
| 819  | 823  | 895  | 906  | 916  | 933  | 935  | 944  |
| 944  | 952  | 970  | 990  | 1002 | 1026 | 1032 | 1070 |
| 1083 | 1091 | 1099 | 1133 | 1141 | 1158 | 1171 | 1185 |
| 1203 | 1216 | 1230 | 1234 | 1245 | 1258 | 1292 | 1296 |
| 1332 | 1351 | 1352 | 1364 | 1371 | 1373 | 1374 | 1384 |
| 1387 | 1390 | 1396 | 1420 | 1440 | 1444 | 1447 | 1454 |
| 1455 | 1457 | 1461 | 1462 | 1464 | 1468 | 1476 | 1477 |
| 1496 | 1519 | 1660 | 1691 | 1705 | 3037 | 3039 | 3042 |
| 3043 | 3047 | 3051 | 3052 | 3054 | 3056 | 3119 | 3124 |
| 3125 | 3128 | 3130 | 3131 | 3134 | 3138 | 3140 | 3142 |
| 3144 | 3148 | 3151 | 3187 | 3190 | -992 |      |      |

### Product P4 (G2)

Figure S21. The optimized structure of product P4 (G2).

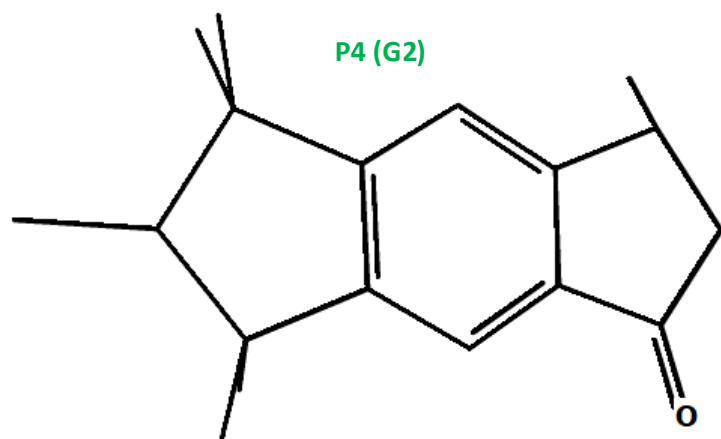

Table S37. Geometry (Å) of product P4 (G2).

| Atom | x        | y        | z        |
|------|----------|----------|----------|
| O    | 3.434281 | -2.51373 | 0.413555 |
| C    | -2.79094 | 0.030419 | -0.53993 |
| C    | -1.95049 | 1.258086 | -0.06968 |
| C    | -2.02764 | -1.25653 | -0.09893 |
| C    | -0.5583  | 0.662066 | 0.03361  |
| C    | -0.60305 | -0.74509 | 0.017892 |
| C    | -4.26594 | 0.071839 | -0.1665  |
| C    | -2.37294 | 1.81455  | 1.299505 |
| C    | -2.01645 | 2.388834 | -1.1004  |
| C    | -2.48837 | -1.82182 | 1.253941 |
| C    | -2.1589  | -2.35525 | -1.15749 |
| C    | 0.645636 | 1.354611 | 0.154856 |
| C    | 0.565403 | -1.48782 | 0.127002 |
| C    | 1.823241 | 0.610763 | 0.263269 |
| C    | 1.768034 | -0.78428 | 0.247321 |
| C    | 3.246661 | 1.123902 | 0.393129 |
| C    | 3.13449  | -1.33756 | 0.375165 |
| C    | 4.101992 | -0.16039 | 0.449937 |
| C    | 3.633431 | 2.055992 | -0.75515 |
| H    | -2.7243  | 0.041492 | -1.64204 |
| H    | -4.41498 | 0.066928 | 0.922821 |
| H    | -4.74542 | 0.977575 | -0.56809 |
| H    | -4.79699 | -0.79712 | -0.58392 |
| H    | -1.67695 | 2.609928 | 1.607488 |
| H    | -3.38258 | 2.249585 | 1.248332 |
| H    | -2.36748 | 1.042382 | 2.081624 |
| H    | -1.42933 | 3.260815 | -0.77349 |
| H    | -1.63035 | 2.056555 | -2.07552 |
| H    | -3.05823 | 2.719897 | -1.23416 |
| H    | -2.44104 | -1.0723  | 2.056551 |

|   |          |          |          |
|---|----------|----------|----------|
| H | -3.5215  | -2.19601 | 1.190138 |
| H | -1.84108 | -2.66407 | 1.543021 |
| H | -3.21767 | -2.62452 | -1.29809 |
| H | -1.75445 | -2.02132 | -2.12449 |
| H | -1.62026 | -3.26578 | -0.85276 |
| H | 0.665639 | 2.447361 | 0.16726  |
| H | 0.566178 | -2.58059 | 0.119134 |
| H | 3.336363 | 1.677924 | 1.340517 |
| H | 4.800025 | -0.23036 | -0.39873 |
| H | 4.702754 | -0.24551 | 1.366438 |
| H | 3.553356 | 1.527733 | -1.71789 |
| H | 2.97557  | 2.93635  | -0.7906  |
| H | 4.668665 | 2.407251 | -0.6374  |

Table S38. Frequencies (cm<sup>-1</sup>) of product P4 (G2)

|      |      |      |      |      |      |      |      |
|------|------|------|------|------|------|------|------|
| 36   | 53   | 64   | 106  | 132  | 148  | 183  | 222  |
| 224  | 240  | 242  | 246  | 259  | 272  | 274  | 280  |
| 297  | 313  | 331  | 334  | 346  | 360  | 387  | 401  |
| 452  | 503  | 523  | 544  | 548  | 566  | 588  | 611  |
| 619  | 660  | 708  | 724  | 763  | 794  | 819  | 825  |
| 890  | 914  | 917  | 934  | 939  | 944  | 946  | 954  |
| 974  | 991  | 1002 | 1027 | 1033 | 1075 | 1082 | 1092 |
| 1100 | 1124 | 1142 | 1159 | 1187 | 1195 | 1204 | 1217 |
| 1225 | 1235 | 1246 | 1262 | 1294 | 1298 | 1333 | 1351 |
| 1352 | 1365 | 1372 | 1374 | 1382 | 1382 | 1385 | 1392 |
| 1398 | 1409 | 1438 | 1443 | 1446 | 1454 | 1456 | 1457 |
| 1461 | 1462 | 1463 | 1468 | 1476 | 1478 | 1501 | 1521 |
| 1665 | 1700 | 1832 | 3040 | 3041 | 3043 | 3048 | 3053 |
| 3055 | 3055 | 3078 | 3084 | 3119 | 3124 | 3126 | 3129 |
| 3130 | 3130 | 3131 | 3137 | 3139 | 3142 | 3146 | 3150 |
| 3151 | 3187 | 3192 |      |      |      |      |      |

### TS1B

Figure S22. The optimized structure of TS1B transition state.

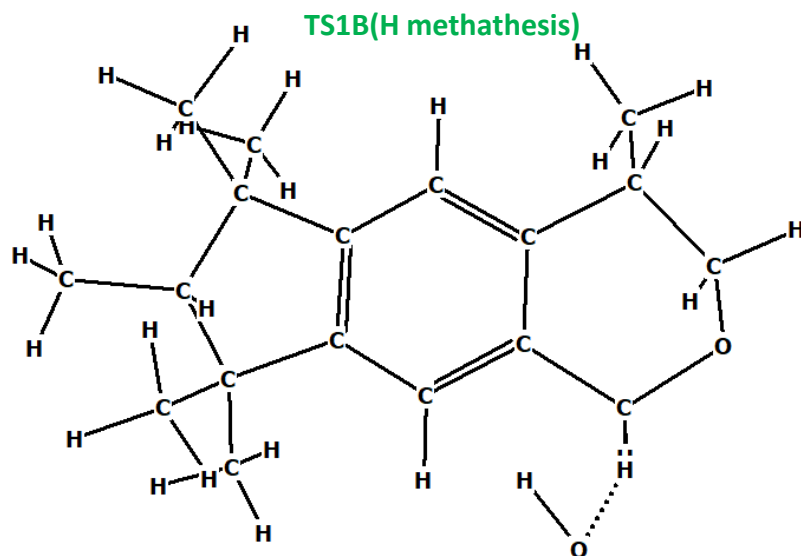

Table S39. Geometry (Å) of TS1B transition state.

| Atom | x        | y        | z        |
|------|----------|----------|----------|
| O    | 3.854985 | 1.096535 | 0.034557 |
| C    | -3.17874 | -0.04545 | -0.60221 |
| C    | -2.59526 | 0.244285 | 0.817325 |
| C    | -2.00439 | -0.55095 | -1.49937 |
| C    | -1.12806 | 0.476292 | 0.502617 |
| C    | -0.80295 | 0.037832 | -0.78462 |
| C    | -4.43225 | -0.9088  | -0.62711 |
| C    | -2.73954 | -0.92926 | 1.79864  |
| C    | -3.25613 | 1.480441 | 1.433753 |
| C    | -1.87841 | -2.08141 | -1.55649 |
| C    | -2.14315 | -0.01843 | -2.92797 |
| C    | -0.15072 | 1.023148 | 1.328692 |
| C    | 0.503201 | 0.145326 | -1.24455 |
| C    | 1.172498 | 1.142022 | 0.879935 |
| C    | 1.490401 | 0.695507 | -0.41514 |
| C    | 2.26427  | 1.736261 | 1.75571  |
| C    | 2.894184 | 0.813477 | -0.93799 |
| C    | 3.439225 | 2.157931 | 0.882032 |
| C    | 1.795948 | 2.917712 | 2.603182 |
| H    | -3.44648 | 0.94494  | -1.01046 |
| H    | -4.24554 | -1.91754 | -0.23093 |
| H    | -5.23237 | -0.45278 | -0.02432 |
| H    | -4.8111  | -1.01663 | -1.65493 |
| H    | -2.21277 | -0.69526 | 2.736497 |
| H    | -3.798   | -1.1089  | 2.041    |
| H    | -2.31414 | -1.86006 | 1.397711 |
| H    | -2.84658 | 1.692483 | 2.433621 |
| H    | -3.10127 | 2.367295 | 0.801254 |

|   |          |          |          |
|---|----------|----------|----------|
| H | -4.34005 | 1.318792 | 1.545175 |
| H | -1.80297 | -2.53056 | -0.55611 |
| H | -2.74338 | -2.52647 | -2.07149 |
| H | -0.97203 | -2.35725 | -2.11781 |
| H | -3.08042 | -0.37831 | -3.38118 |
| H | -2.1531  | 1.0817   | -2.9386  |
| H | -1.31165 | -0.3632  | -3.56213 |
| H | -0.41579 | 1.362681 | 2.332566 |
| H | 0.78206  | -0.21352 | -2.23967 |
| H | 2.631388 | 0.941347 | 2.428352 |
| H | 3.198093 | -0.19699 | -1.41548 |
| H | 2.952331 | 1.52382  | -1.78681 |
| H | 3.160067 | 3.039928 | 0.272834 |
| H | 4.308617 | 2.422546 | 1.498047 |
| H | 1.352262 | 3.700361 | 1.968646 |
| H | 1.049221 | 2.616984 | 3.349543 |
| H | 2.647028 | 3.354167 | 3.146869 |
| O | 3.089067 | -1.56725 | -1.97501 |
| H | 2.445901 | -1.86084 | -1.29729 |

Table S40. Frequencies (cm<sup>-1</sup>) of TS1B transition state.

|      |      |      |      |      |      |      |      |
|------|------|------|------|------|------|------|------|
| 31   | 37   | 55   | 87   | 100  | 114  | 146  | 157  |
| 204  | 227  | 230  | 236  | 244  | 249  | 256  | 268  |
| 270  | 276  | 279  | 294  | 308  | 326  | 330  | 338  |
| 358  | 378  | 383  | 413  | 454  | 480  | 513  | 524  |
| 549  | 562  | 587  | 626  | 673  | 691  | 717  | 725  |
| 775  | 796  | 825  | 838  | 879  | 900. | 909  | 922  |
| 937  | 944  | 946  | 956  | 963  | 991  | 992  | 1007 |
| 1012 | 1028 | 1063 | 1083 | 1092 | 1104 | 1122 | 1154 |
| 1158 | 1163 | 1188 | 1212 | 1216 | 1219 | 1232 | 1245 |
| 1260 | 1278 | 1296 | 1303 | 1311 | 1335 | 1351 | 1352 |
| 1358 | 1374 | 1375 | 1378 | 1387 | 1391 | 1392 | 1397 |
| 1398 | 1410 | 1438 | 1442 | 1444 | 1450 | 1453 | 1456 |
| 1459 | 1460 | 1466 | 1466 | 1470 | 1474 | 1475 | 1489 |
| 1542 | 1643 | 1690 | 1709 | 3015 | 3017 | 3039 | 3041 |
| 3045 | 3046 | 3048 | 3052 | 3056 | 3064 | 3120 | 3125 |
| 3127 | 3128 | 3132 | 3133 | 3134 | 3135 | 3139 | 3140 |
| 3143 | 3151 | 3154 | 3178 | 3203 | 3722 | -899 |      |

### P1B

Figure S23. The optimized structure of P1B.

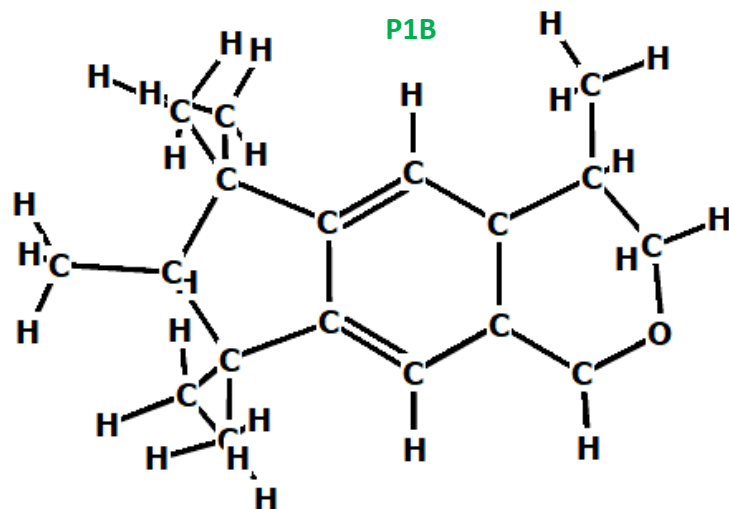

Table S41. Geometry (Å) of P1B.

| Atom | x        | y        | z        |
|------|----------|----------|----------|
| O    | 4.147568 | -1.32532 | -0.11155 |
| C    | -2.83469 | 0.146656 | -0.48935 |
| C    | -1.89194 | 1.294661 | -0.00945 |
| C    | -2.13512 | -1.20835 | -0.15331 |
| C    | -0.54382 | 0.60029  | -0.00867 |
| C    | -0.67492 | -0.79281 | -0.09514 |
| C    | -4.28342 | 0.260058 | -0.03503 |
| C    | -2.21845 | 1.819563 | 1.397938 |
| C    | -1.93438 | 2.473428 | -0.98696 |
| C    | -2.56133 | -1.80546 | 1.196566 |
| C    | -2.40014 | -2.24176 | -1.25144 |
| C    | 0.724274 | 1.185235 | 0.089505 |
| C    | 0.443536 | -1.60859 | -0.10545 |
| C    | 1.86591  | 0.392612 | 0.094102 |
| C    | 1.739346 | -1.02778 | -0.02432 |
| C    | 3.27146  | 0.935091 | 0.252075 |
| C    | 2.897681 | -1.83079 | -0.04609 |
| C    | 4.223999 | 0.039167 | -0.53023 |
| C    | 3.439466 | 2.387172 | -0.18157 |
| H    | -2.82479 | 0.209492 | -1.59185 |
| H    | -4.37836 | 0.201889 | 1.058953 |
| H    | -4.72043 | 1.216525 | -0.36041 |
| H    | -4.89377 | -0.54715 | -0.46842 |
| H    | -1.45455 | 2.550261 | 1.706244 |
| H    | -3.19565 | 2.32671  | 1.411779 |
| H    | -2.23541 | 1.015709 | 2.147498 |
| H    | -1.2706  | 3.287157 | -0.65545 |
| H    | -1.62075 | 2.160782 | -1.99417 |
| H    | -2.9552  | 2.882497 | -1.05239 |

|   |          |          |          |
|---|----------|----------|----------|
| H | -2.42153 | -1.09662 | 2.024987 |
| H | -3.61925 | -2.10898 | 1.175953 |
| H | -1.95656 | -2.69928 | 1.413909 |
| H | -3.48114 | -2.43162 | -1.34614 |
| H | -2.02406 | -1.88816 | -2.22316 |
| H | -1.91203 | -3.20125 | -1.01983 |
| H | 0.816532 | 2.271171 | 0.167992 |
| H | 0.350082 | -2.695   | -0.18793 |
| H | 3.556443 | 0.846441 | 1.316894 |
| H | 2.872646 | -2.91922 | -0.00532 |
| H | 3.987364 | 0.090632 | -1.60845 |
| H | 5.268553 | 0.335586 | -0.3773  |
| H | 3.112745 | 2.522616 | -1.22421 |
| H | 2.851773 | 3.064461 | 0.451791 |
| H | 4.493342 | 2.691133 | -0.10534 |

Table S42. Frequencies ( $\text{cm}^{-1}$ ) of P1B.

|      |      |      |      |      |      |      |      |
|------|------|------|------|------|------|------|------|
| 46   | 63   | 103  | 119  | 146  | 174  | 205  | 229  |
| 237  | 241  | 246  | 256  | 257  | 272  | 277  | 287  |
| 308  | 318  | 328  | 343  | 351  | 361  | 379  | 400  |
| 417  | 449  | 487  | 518  | 533  | 548  | 562  | 587  |
| 641  | 667  | 693  | 716  | 720  | 772  | 802  | 823  |
| 846  | 885  | 896  | 919  | 935  | 943. | 945  | 953  |
| 962  | 986  | 990  | 1004 | 1028 | 1028 | 1064 | 1091 |
| 1102 | 1111 | 1152 | 1153 | 1160 | 1187 | 1203 | 1211 |
| 1216 | 1242 | 1260 | 1264 | 1280 | 1294 | 1316 | 1320 |
| 1336 | 1349 | 1352 | 1361 | 1370 | 1373 | 1383 | 1386 |
| 1390 | 1391 | 1397 | 1430 | 1439 | 1443 | 1447 | 1454 |
| 1456 | 1458 | 1460 | 1463 | 1467 | 1468 | 1471 | 1476 |
| 1478 | 1522 | 1539 | 1604 | 1661 | 3030 | 3035 | 3040 |
| 3041 | 3045 | 3050 | 3053 | 3053 | 3060 | 3118 | 3121 |
| 3122 | 3127 | 3131 | 3132 | 3132 | 3137 | 3139 | 3143 |
| 3149 | 3152 | 3154 | 3183 | 3193 | 3246 |      |      |

### TS2B (OH addition)

Figure S24. The optimized structure of transition state TS2B.

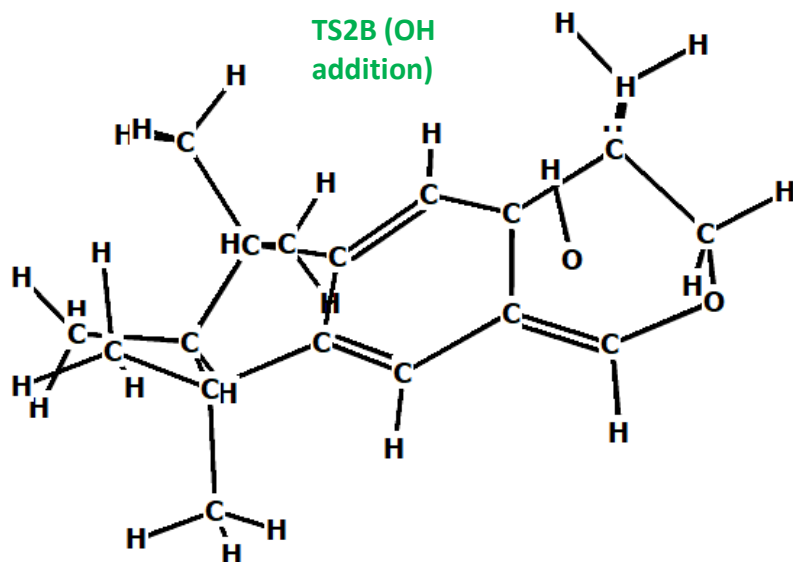

Table S43. Geometry (Å) of transition state TS2B.

| Atom | x        | y        | z        |
|------|----------|----------|----------|
| O    | 3.335791 | -2.25689 | -1.35615 |
| C    | -3.14137 | 0.403817 | -0.15766 |
| C    | -1.93148 | 1.379251 | -0.00632 |
| C    | -2.63516 | -1.03384 | 0.178396 |
| C    | -0.76027 | 0.455345 | -0.20462 |
| C    | -1.15294 | -0.92848 | -0.13688 |
| C    | -4.41244 | 0.830014 | 0.563391 |
| C    | -1.84602 | 2.063476 | 1.371595 |
| C    | -1.98137 | 2.47381  | -1.08177 |
| C    | -2.8174  | -1.42176 | 1.654875 |
| C    | -3.33769 | -2.07796 | -0.69267 |
| C    | 0.624614 | 0.817389 | -0.34255 |
| C    | -0.2504  | -1.92526 | -0.30256 |
| C    | 1.567864 | -0.14728 | -0.49785 |
| C    | 1.144537 | -1.56674 | -0.6184  |
| C    | 2.104975 | -2.54478 | -0.87072 |
| C    | 3.460514 | 1.506297 | -0.91683 |
| H    | -3.36197 | 0.385923 | -1.23935 |
| H    | -4.27265 | 0.878592 | 1.652922 |
| H    | -4.74018 | 1.82351  | 0.22111  |
| H    | -5.23134 | 0.123202 | 0.360181 |
| H    | -0.91895 | 2.653723 | 1.436442 |
| H    | -2.69355 | 2.750887 | 1.517491 |
| H    | -1.84196 | 1.337685 | 2.196475 |
| H    | -1.12857 | 3.163408 | -0.98519 |
| H    | -1.96048 | 2.034931 | -2.09031 |
| H    | -2.90451 | 3.065962 | -0.97892 |
| H    | -2.33925 | -0.70337 | 2.335697 |



|   |          |          |          |
|---|----------|----------|----------|
| H | -3.88525 | -1.48643 | 1.91346  |
| H | -2.36329 | -2.40784 | 1.835289 |
| H | -4.42305 | -2.06494 | -0.50644 |
| H | -3.16549 | -1.88017 | -1.76095 |
| H | -2.97167 | -3.09098 | -0.46562 |
| H | 0.911218 | 1.870328 | -0.2945  |
| H | -0.52024 | -2.98088 | -0.23492 |
| H | 1.804217 | -3.57062 | -1.08473 |
| H | 2.997589 | 1.849538 | -1.85446 |
| H | 3.150819 | 2.186968 | -0.11259 |
| H | 4.552106 | 1.581112 | -1.01874 |
| C | 3.053897 | 0.071899 | -0.60848 |
| H | 3.523739 | -0.23644 | 0.34482  |
| C | 3.580052 | -0.88633 | -1.67622 |
| H | 4.668273 | -0.7994  | -1.78229 |
| H | 3.106332 | -0.65573 | -2.64746 |
| O | 2.337004 | -2.94666 | 0.945304 |
| H | 2.520224 | -2.07157 | 1.333006 |

Table S44. Frequencies (cm<sup>-1</sup>) of transition state TS2B.

|      |      |      |      |      |      |      |      |
|------|------|------|------|------|------|------|------|
| 33   | 58   | 88   | 102  | 110  | 140  | 164  | 176  |
| 203  | 224  | 229  | 236  | 244  | 250  | 259  | 260  |
| 273  | 284  | 290  | 303  | 322  | 330  | 346  | 349  |
| 354  | 383  | 390  | 417  | 443  | 457  | 505  | 524  |
| 540  | 561  | 579  | 636  | 649  | 689  | 698  | 708  |
| 779  | 806  | 815  | 822  | 858  | 885. | 900  | 930  |
| 941  | 944  | 947  | 959  | 982  | 987  | 998  | 1017 |
| 1020 | 1052 | 1059 | 1081 | 1089 | 1100 | 1130 | 1146 |
| 1151 | 1162 | 1183 | 1201 | 1212 | 1232 | 1250 | 1257 |
| 1266 | 1280 | 1300 | 1311 | 1324 | 1344 | 1348 | 1350 |
| 1363 | 1373 | 1375 | 1385 | 1388 | 1388 | 1395 | 1397 |
| 1421 | 1439 | 1443 | 1446 | 1453 | 1454 | 1458 | 1462 |
| 1464 | 1466 | 1468 | 1468 | 1477 | 1479 | 1549 | 1628 |
| 1716 | 3018 | 3037 | 3040 | 3043 | 3046 | 3050 | 3053 |
| 3057 | 3057 | 3120 | 3124 | 3124 | 3126 | 3130 | 3131 |
| 3135 | 3138 | 3142 | 3144 | 3147 | 3149 | 3154 | 3186 |
| 3199 | 3224 | 3759 | -852 |      |      |      |      |

## P2B

Figure S25. The optimized structure of product P2B.

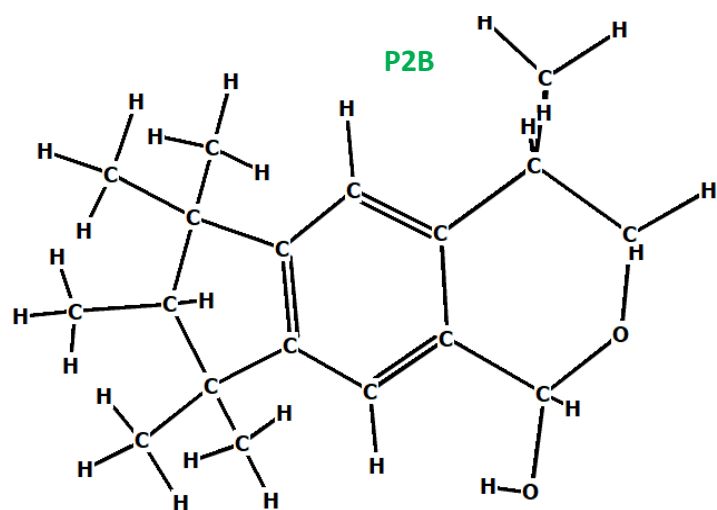

Table S45. Geometry (Å) of product P2B.

| Atom | x        | y        | z        |
|------|----------|----------|----------|
| O    | 3.512622 | -2.14432 | -0.28445 |
| C    | -3.12778 | 0.442101 | -0.11364 |
| C    | -1.93129 | 1.423158 | 0.096309 |
| C    | -2.61364 | -0.99879 | 0.197263 |
| C    | -0.74259 | 0.498123 | -0.09473 |
| C    | -1.12276 | -0.84537 | -0.04111 |
| C    | -4.42234 | 0.836205 | 0.583474 |
| C    | -1.88189 | 2.052748 | 1.497278 |
| C    | -1.96092 | 2.54685  | -0.94319 |
| C    | -2.86805 | -1.45019 | 1.643681 |
| C    | -3.24822 | -2.01939 | -0.75133 |
| C    | 0.591582 | 0.846581 | -0.28158 |
| C    | -0.16282 | -1.84255 | -0.1731  |
| C    | 1.570643 | -0.14671 | -0.42524 |
| C    | 1.180064 | -1.49595 | -0.36546 |
| C    | 2.202347 | -2.61107 | -0.5199  |
| C    | 3.260605 | 1.373761 | -1.58153 |
| H    | -3.31858 | 0.450448 | -1.20126 |
| H    | -4.31256 | 0.860587 | 1.677388 |
| H    | -4.75352 | 1.834173 | 0.257836 |
| H    | -5.22696 | 0.125223 | 0.341256 |
| H    | -0.95991 | 2.644914 | 1.604902 |
| H    | -2.73693 | 2.727983 | 1.653998 |
| H    | -1.88832 | 1.295707 | 2.294176 |
| H    | -1.11639 | 3.239407 | -0.80321 |
| H    | -1.90972 | 2.140758 | -1.96453 |
| H    | -2.89007 | 3.130794 | -0.84842 |
| H    | -2.45757 | -0.74271 | 2.378082 |
| H    | -3.94625 | -1.56175 | 1.835399 |
| H    | -2.39102 | -2.42751 | 1.814996 |

|   |          |          |          |
|---|----------|----------|----------|
| H | -4.3431  | -2.02572 | -0.63001 |
| H | -3.01675 | -1.78027 | -1.80004 |
| H | -2.88324 | -3.03653 | -0.53986 |
| H | 0.879397 | 1.900039 | -0.31474 |
| H | -0.4364  | -2.8994  | -0.12372 |
| H | 2.150046 | -3.03296 | -1.54129 |
| H | 2.80791  | 1.156073 | -2.56117 |
| H | 2.830896 | 2.31144  | -1.206   |
| H | 4.338345 | 1.539996 | -1.72858 |
| C | 3.035309 | 0.212967 | -0.61458 |
| H | 3.442866 | 0.490978 | 0.373054 |
| C | 3.801948 | -1.01597 | -1.08903 |
| H | 4.885207 | -0.84813 | -1.02508 |
| H | 3.549133 | -1.22942 | -2.14714 |
| O | 1.959676 | -3.68132 | 0.333919 |
| H | 1.878142 | -3.31776 | 1.229648 |

Table S46. Frequencies ( $\text{cm}^{-1}$ ) of product P2B.

|      |      |      |      |      |      |      |      |
|------|------|------|------|------|------|------|------|
| 42   | 62   | 73   | 106  | 132  | 140  | 188  | 215  |
| 225  | 236  | 242  | 250  | 255  | 261  | 263  | 272  |
| 281  | 295  | 318  | 326  | 342  | 352  | 369  | 382  |
| 386  | 418  | 438  | 465  | 485  | 513  | 522  | 549  |
| 576  | 590  | 614  | 648  | 684  | 698  | 726  | 776  |
| 808  | 825  | 840  | 910  | 920  | 932. | 934  | 945  |
| 947  | 956  | 961  | 987  | 991  | 1002 | 1027 | 1048 |
| 1070 | 1092 | 1104 | 1124 | 1135 | 1149 | 1160 | 1165 |
| 1184 | 1204 | 1212 | 1217 | 1231 | 1246 | 1254 | 1283 |
| 1296 | 1303 | 1319 | 1325 | 1346 | 1351 | 1353 | 1369 |
| 1372 | 1374 | 1377 | 1385 | 1391 | 1393 | 1398 | 1413 |
| 1437 | 1438 | 1441 | 1446 | 1450 | 1454 | 1458 | 1461 |
| 1462 | 1468 | 1468 | 1473 | 1474 | 1481 | 1489 | 1544 |
| 1662 | 1706 | 3013 | 3029 | 3033 | 3038 | 3044 | 3045 |
| 3046 | 3051 | 3053 | 3061 | 3116 | 3122 | 3124 | 3125 |
| 3129 | 3133 | 3134 | 3135 | 3137 | 3138 | 3144 | 3150 |
| 3167 | 3184 | 3187 | 3791 |      |      |      |      |

### TS3B\_v1

Figure S27. The optimized structure of TS3B\_v1.

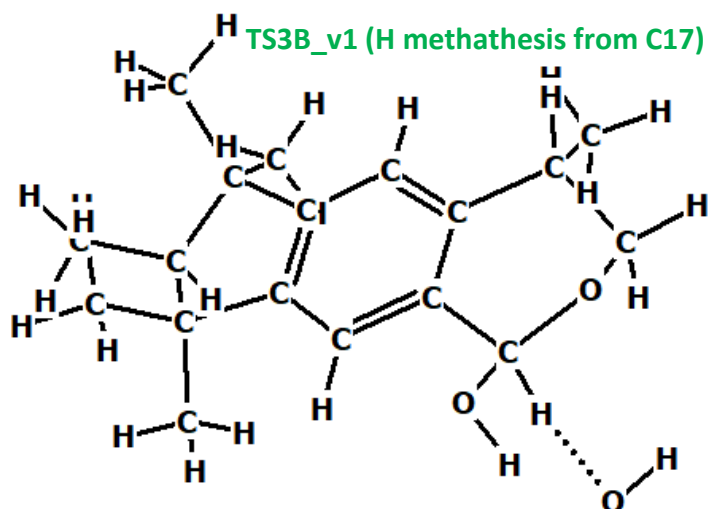

Table S47. Geometry (Å) of TS3B\_v1.

| Atom | x        | y        | z        |
|------|----------|----------|----------|
| O    | 3.879158 | -0.36695 | -0.53478 |
| C    | -3.23321 | 0.151117 | -0.34631 |
| C    | -2.38216 | 1.252911 | 0.361265 |
| C    | -2.3338  | -1.11644 | -0.49172 |
| C    | -0.96957 | 0.805982 | 0.030662 |
| C    | -0.94447 | -0.50729 | -0.44688 |
| C    | -4.6102  | -0.09268 | 0.255317 |
| C    | -2.5705  | 1.300025 | 1.88525  |
| C    | -2.69866 | 2.635619 | -0.21592 |
| C    | -2.4964  | -2.12921 | 0.652206 |
| C    | -2.60749 | -1.82981 | -1.81827 |
| C    | 0.210911 | 1.530993 | 0.167603 |
| C    | 0.265325 | -1.09811 | -0.79085 |
| C    | 1.439629 | 0.955201 | -0.18093 |
| C    | 1.45259  | -0.3689  | -0.65429 |
| C    | 2.751972 | -1.01214 | -1.06115 |
| C    | 2.648143 | 3.184603 | -0.45437 |
| H    | -3.37967 | 0.519062 | -1.37713 |
| H    | -4.55021 | -0.46058 | 1.289889 |
| H    | -5.20303 | 0.834832 | 0.262759 |
| H    | -5.16708 | -0.83707 | -0.33394 |
| H    | -1.86868 | 2.026549 | 2.322807 |
| H    | -3.59203 | 1.61828  | 2.143324 |
| H    | -2.38264 | 0.324996 | 2.356268 |
| H    | -2.10841 | 3.419818 | 0.283025 |
| H    | -2.48124 | 2.671337 | -1.29394 |
| H    | -3.76364 | 2.875162 | -0.06892 |
| H    | -2.33934 | -1.6715  | 1.639194 |
| H    | -3.50037 | -2.58008 | 0.63531  |

|   |          |          |          |
|---|----------|----------|----------|
| H | -1.7598  | -2.93931 | 0.53636  |
| H | -3.65677 | -2.16107 | -1.86578 |
| H | -2.41514 | -1.16268 | -2.67166 |
| H | -1.97139 | -2.722   | -1.92658 |
| H | 0.180373 | 2.55491  | 0.546881 |
| H | 0.312643 | -2.12459 | -1.16014 |
| H | 2.855168 | -0.9431  | -2.21441 |
| H | 2.285019 | 3.26174  | -1.49075 |
| H | 1.970347 | 3.758018 | 0.190862 |
| H | 3.638792 | 3.659722 | -0.39863 |
| C | 2.743026 | 1.721222 | -0.02431 |
| H | 3.026897 | 1.683744 | 1.041868 |
| C | 3.846444 | 1.025725 | -0.81182 |
| H | 4.832606 | 1.423354 | -0.54182 |
| H | 3.693602 | 1.184845 | -1.89847 |
| O | 3.907112 | -1.60717 | -3.20924 |
| H | 4.653977 | -1.1481  | -2.77151 |
| O | 2.785512 | -2.34893 | -0.73168 |
| H | 3.400201 | -2.75534 | -1.36544 |

Table S48. Frequencies (cm<sup>-1</sup>) of TS3B\_v1.

|      |      |      |      |      |      |      |      |
|------|------|------|------|------|------|------|------|
| 34   | 42   | 62   | 75   | 97   | 119  | 141  | 155  |
| 190  | 216  | 225  | 235  | 241  | 245  | 256  | 260  |
| 267  | 278  | 292  | 310  | 317  | 323  | 329  | 344  |
| 354  | 356  | 381  | 394  | 422  | 432  | 478  | 495  |
| 503  | 521  | 548  | 571  | 578  | 604  | 626  | 662  |
| 694  | 705  | 725  | 764  | 794  | 810. | 825  | 846  |
| 909  | 920  | 933  | 939  | 946  | 948  | 957  | 958  |
| 988  | 993  | 1006 | 1029 | 1055 | 1078 | 1092 | 1106 |
| 1124 | 1132 | 1154 | 1161 | 1173 | 1187 | 1212 | 1217 |
| 1226 | 1240 | 1247 | 1270 | 1287 | 1296 | 1304 | 1321 |
| 1350 | 1351 | 1353 | 1363 | 1371 | 1373 | 1375 | 1386 |
| 1387 | 1392 | 1400 | 1411 | 1427 | 1441 | 1445 | 1448 |
| 1452 | 1456 | 1460 | 1460 | 1463 | 1466 | 1470 | 1471 |
| 1478 | 1480 | 1492 | 1545 | 1660 | 1703 | 2090 | 3011 |
| 3036 | 3043 | 3045 | 3050 | 3051 | 3052 | 3055 | 3062 |
| 3121 | 3125 | 3125 | 3128 | 3131 | 3132 | 3137 | 3138 |
| 3141 | 3144 | 3146 | 3148 | 3159 | 3192 | 3195 | 3722 |
| 3752 | -808 |      |      |      |      |      |      |

### TS3B\_v2

Figure S28. The optimized structure of TS3B\_v2 transition state.

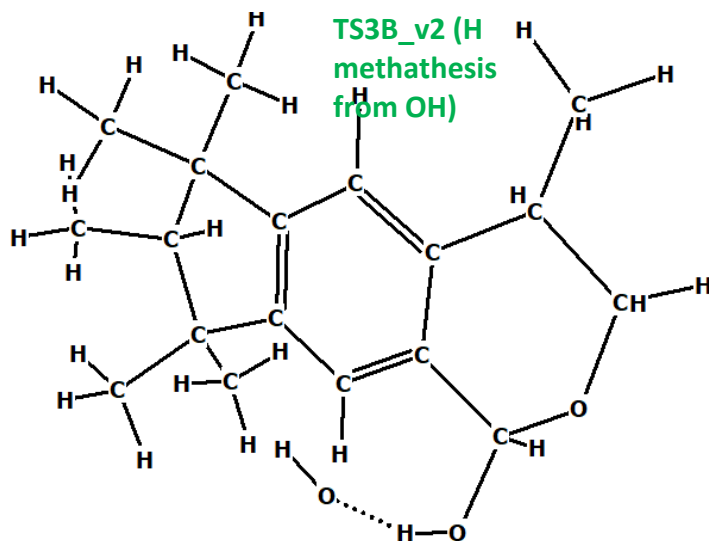

Table S49. Geometry (Å) of TS3B\_v2 transition state.

| Atom | x        | y        | z        |
|------|----------|----------|----------|
| O    | 3.404072 | -2.40215 | -0.03238 |
| C    | -3.13429 | 0.451066 | -0.1142  |
| C    | -1.90982 | 1.372761 | 0.186829 |
| C    | -2.6918  | -1.02137 | 0.15548  |
| C    | -0.75101 | 0.407946 | 0.011303 |
| C    | -1.18752 | -0.9199  | -0.01042 |
| C    | -4.44032 | 0.868329 | 0.547348 |
| C    | -1.89938 | 1.943389 | 1.613496 |
| C    | -1.84736 | 2.535536 | -0.80752 |
| C    | -3.02097 | -1.5229  | 1.570563 |
| C    | -3.32261 | -1.97585 | -0.8617  |
| C    | 0.603384 | 0.706998 | -0.09853 |
| C    | -0.26439 | -1.95175 | -0.13359 |
| C    | 1.549483 | -0.32027 | -0.22732 |
| C    | 1.100854 | -1.65092 | -0.22897 |
| C    | 2.087136 | -2.80828 | -0.29238 |
| C    | 3.361864 | 1.156946 | -1.24133 |
| H    | -3.27821 | 0.512131 | -1.20734 |
| H    | -4.37676 | 0.831169 | 1.644492 |
| H    | -4.71157 | 1.895867 | 0.261005 |
| H    | -5.26418 | 0.208106 | 0.236035 |
| H    | -0.96299 | 2.495871 | 1.785824 |
| H    | -2.73708 | 2.642043 | 1.760225 |
| H    | -1.96934 | 1.15493  | 2.376136 |
| H    | -0.98851 | 3.191821 | -0.59795 |
| H    | -1.75765 | 2.166816 | -1.8402  |
| H    | -2.75994 | 3.148188 | -0.73632 |
| H    | -2.61695 | -0.86122 | 2.349902 |

|   |          |          |          |
|---|----------|----------|----------|
| H | -4.10924 | -1.60416 | 1.714596 |
| H | -2.58408 | -2.52271 | 1.719874 |
| H | -4.42098 | -1.94117 | -0.78722 |
| H | -3.03553 | -1.70422 | -1.88826 |
| H | -3.00837 | -3.01491 | -0.67801 |
| H | 0.935291 | 1.747733 | -0.07793 |
| H | -0.583   | -2.99748 | -0.13641 |
| H | 2.033097 | -3.27175 | -1.30332 |
| H | 2.946612 | 0.994539 | -2.24783 |
| H | 2.95995  | 2.101576 | -0.85261 |
| H | 4.45201  | 1.274599 | -1.3317  |
| C | 3.035535 | -0.02268 | -0.3275  |
| H | 3.40244  | 0.200402 | 0.689621 |
| C | 3.766449 | -1.27068 | -0.8058  |
| H | 4.852494 | -1.15298 | -0.69963 |
| H | 3.541801 | -1.45261 | -1.87537 |
| O | 1.754888 | -3.83676 | 0.560059 |
| H | 1.725561 | -3.45734 | 1.581758 |
| O | 1.470679 | -2.67614 | 2.52994  |
| H | 0.656184 | -2.21746 | 2.240036 |

Table S50. Frequencies (cm<sup>-1</sup>) of TS3B\_v2 transition state.

|      |       |      |      |      |      |      |      |
|------|-------|------|------|------|------|------|------|
| 27   | 38    | 56   | 80   | 102  | 116  | 138  | 154  |
| 197  | 204   | 224  | 229  | 241  | 250  | 256  | 260  |
| 264  | 269   | 277  | 285  | 294  | 326  | 330  | 338  |
| 346  | 370   | 382  | 396  | 428  | 447  | 467  | 485  |
| 516  | 523   | 550  | 576  | 589  | 612  | 644  | 682  |
| 697  | 725   | 764  | 779  | 814  | 825  | 840  | 904  |
| 911  | 922   | 930  | 940  | 946  | 950  | 956  | 959  |
| 992  | 996   | 1006 | 1026 | 1050 | 1072 | 1092 | 1106 |
| 1123 | 1129  | 1152 | 1160 | 1164 | 1192 | 1200 | 1213 |
| 1216 | 1228  | 1246 | 1255 | 1282 | 1291 | 1295 | 1301 |
| 1319 | 1334  | 1348 | 1350 | 1359 | 1373 | 1376 | 1383 |
| 1388 | 1391  | 1394 | 1398 | 1411 | 1438 | 1443 | 1446 |
| 1446 | 1455  | 1459 | 1460 | 1461 | 1463 | 1468 | 1469 |
| 1474 | 1475  | 1478 | 1489 | 1540 | 1656 | 1701 | 2959 |
| 3022 | 3039  | 3044 | 3045 | 3049 | 3050 | 3053 | 3057 |
| 3066 | 3124  | 3127 | 3128 | 3129 | 3133 | 3135 | 3140 |
| 3140 | 3144  | 3148 | 3149 | 3151 | 3153 | 3198 | 3204 |
| 3703 | -1640 |      |      |      |      |      |      |

### P3B\_v1

Figure S29. The optimized structure of P3B\_v1.

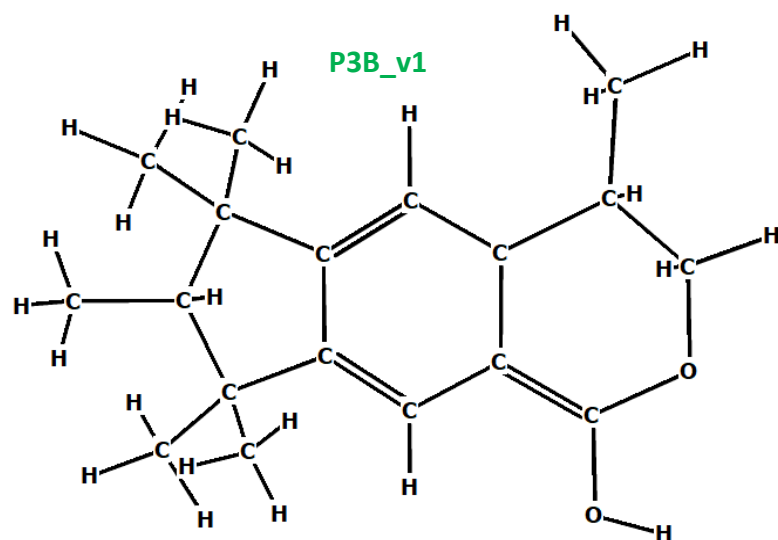

Table S51. Geometry (Å) of P3B\_v1.

| Atom | x        | y        | z        |
|------|----------|----------|----------|
| O    | 4.06548  | -0.94369 | 0.109104 |
| C    | -2.9834  | 0.074669 | -0.51503 |
| C    | -2.12542 | 1.287196 | -0.03344 |
| C    | -2.20679 | -1.22774 | -0.14533 |
| C    | -0.73717 | 0.679434 | 0.00576  |
| C    | -0.77704 | -0.72093 | -0.0595  |
| C    | -4.44546 | 0.102399 | -0.09167 |
| C    | -2.51677 | 1.809354 | 1.358856 |
| C    | -2.22348 | 2.447423 | -1.02954 |
| C    | -2.62426 | -1.83671 | 1.202409 |
| C    | -2.38091 | -2.29003 | -1.2344  |
| C    | 0.493679 | 1.343997 | 0.129918 |
| C    | 0.383599 | -1.4727  | -0.02051 |
| C    | 1.679886 | 0.62978  | 0.184887 |
| C    | 1.641826 | -0.80543 | 0.08999  |
| C    | 2.845251 | -1.51403 | 0.120648 |
| C    | 3.137887 | 2.711516 | -0.09249 |
| H    | -2.95437 | 0.123125 | -1.61796 |
| H    | -4.55777 | 0.060319 | 1.001377 |
| H    | -4.93734 | 1.021783 | -0.44479 |
| H    | -4.99242 | -0.7519  | -0.51955 |
| H    | -1.80691 | 2.590353 | 1.673428 |
| H    | -3.52447 | 2.253658 | 1.348343 |
| H    | -2.49718 | 1.014186 | 2.117717 |
| H    | -1.61165 | 3.302932 | -0.70289 |
| H    | -1.87851 | 2.138194 | -2.02761 |
| H    | -3.26514 | 2.796741 | -1.11426 |
| H    | -2.54319 | -1.11304 | 2.026055 |
| H    | -3.66166 | -2.20357 | 1.165041 |



|   |          |          |          |
|---|----------|----------|----------|
| H | -1.9714  | -2.69049 | 1.440623 |
| H | -3.44429 | -2.55677 | -1.34462 |
| H | -2.01269 | -1.92283 | -2.20399 |
| H | -1.83031 | -3.20958 | -0.98222 |
| H | 0.515355 | 2.434784 | 0.191318 |
| H | 0.36053  | -2.56223 | -0.08056 |
| H | 2.837337 | 2.805705 | -1.14732 |
| H | 2.489868 | 3.363684 | 0.507424 |
| H | 4.168011 | 3.08148  | 0.010954 |
| C | 3.044057 | 1.261075 | 0.369122 |
| H | 3.307076 | 1.212167 | 1.442053 |
| C | 4.07483  | 0.409859 | -0.36426 |
| H | 5.094381 | 0.771512 | -0.18934 |
| H | 3.868133 | 0.406834 | -1.44846 |
| O | 2.875119 | -2.85655 | 0.169238 |
| H | 3.787702 | -3.14043 | -0.00268 |

Table S52. Frequencies (cm<sup>-1</sup>) of P3B\_v1.

|      |      |      |      |      |      |      |      |
|------|------|------|------|------|------|------|------|
| 42   | 64   | 96   | 109  | 135  | 151  | 186  | 224  |
| 228  | 237  | 239  | 244  | 250  | 258  | 262  | 276  |
| 287  | 294  | 321  | 330  | 335  | 341  | 344  | 366  |
| 380  | 400  | 430  | 448  | 477  | 495  | 505  | 543  |
| 551  | 576  | 590  | 641  | 674  | 696  | 714  | 736  |
| 763  | 818  | 826  | 860  | 900  | 914. | 929  | 939  |
| 942  | 950  | 958  | 975  | 988  | 1000 | 1024 | 1043 |
| 1061 | 1090 | 1098 | 1111 | 1116 | 1147 | 1157 | 1165 |
| 1198 | 1208 | 1215 | 1228 | 1240 | 1248 | 1268 | 1293 |
| 1303 | 1314 | 1322 | 1348 | 1350 | 1360 | 1370 | 1372 |
| 1374 | 1382 | 1387 | 1392 | 1394 | 1425 | 1439 | 1442 |
| 1443 | 1446 | 1455 | 1456 | 1459 | 1462 | 1466 | 1467 |
| 1472 | 1474 | 1476 | 1481 | 1525 | 1582 | 1642 | 1656 |
| 3030 | 3039 | 3040 | 3042 | 3042 | 3046 | 3049 | 3059 |
| 3065 | 3117 | 3119 | 3120 | 3121 | 3124 | 3129 | 3135 |
| 3137 | 3138 | 3141 | 3148 | 3162 | 3162 | 3182 | 3194 |
| 3798 |      |      |      |      |      |      |      |

### P3B\_v2

Figure S30. The optimized structure of P3B\_v2.

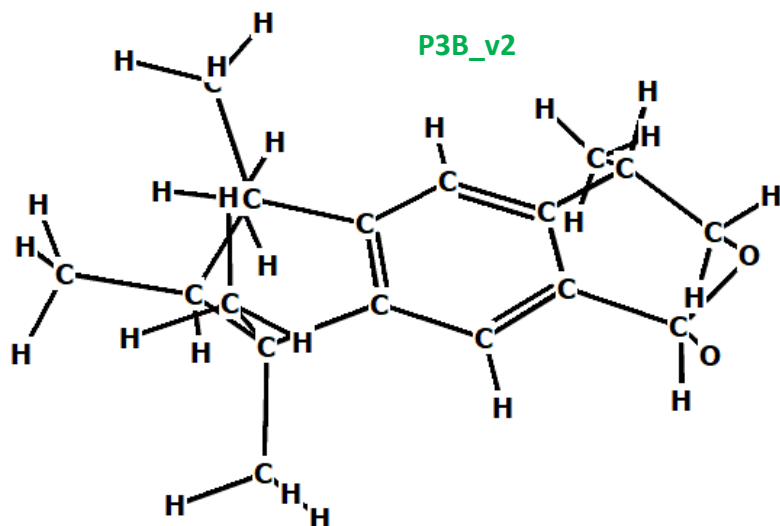

Table S53. Geometry (Å) of P3B\_v2.

| Atom | x        | y        | z        |
|------|----------|----------|----------|
| O    | 3.408819 | -2.34018 | -0.03869 |
| C    | -3.15313 | 0.4833   | -0.15293 |
| C    | -1.93439 | 1.416875 | 0.132492 |
| C    | -2.70966 | -0.97911 | 0.165326 |
| C    | -0.7716  | 0.45059  | -0.00543 |
| C    | -1.20364 | -0.87821 | 0.008857 |
| C    | -4.46713 | 0.91744  | 0.480953 |
| C    | -1.93609 | 2.029249 | 1.541897 |
| C    | -1.86699 | 2.550994 | -0.8939  |
| C    | -3.05542 | -1.437   | 1.590715 |
| C    | -3.32924 | -1.96495 | -0.82881 |
| C    | 0.58217  | 0.751899 | -0.11412 |
| C    | -0.2763  | -1.91009 | -0.08134 |
| C    | 1.534543 | -0.27344 | -0.21108 |
| C    | 1.082582 | -1.60236 | -0.18923 |
| C    | 2.094309 | -2.75605 | -0.29837 |
| C    | 3.329544 | 1.220297 | -1.236   |
| H    | -3.28575 | 0.511046 | -1.24878 |
| H    | -4.41354 | 0.925724 | 1.579252 |
| H    | -4.74432 | 1.930371 | 0.151169 |
| H    | -5.28306 | 0.239194 | 0.18816  |
| H    | -1.00089 | 2.58711  | 1.704535 |
| H    | -2.77397 | 2.732707 | 1.662586 |
| H    | -2.01041 | 1.264171 | 2.327586 |
| H    | -1.00731 | 3.211265 | -0.70073 |
| H    | -1.7754  | 2.153271 | -1.91565 |
| H    | -2.7786  | 3.166934 | -0.84208 |
| H    | -2.65732 | -0.75406 | 2.354581 |
| H    | -4.14552 | -1.50935 | 1.725021 |

|   |          |          |          |
|---|----------|----------|----------|
| H | -2.6252  | -2.4337  | 1.77373  |
| H | -4.42844 | -1.93096 | -0.76597 |
| H | -3.03299 | -1.72354 | -1.8605  |
| H | -3.01447 | -2.99735 | -0.61099 |
| H | 0.908706 | 1.794158 | -0.12445 |
| H | -0.58731 | -2.95665 | -0.06232 |
| H | 2.03417  | -3.15881 | -1.34628 |
| H | 2.908808 | 1.059735 | -2.24053 |
| H | 2.92443  | 2.16034  | -0.84015 |
| H | 4.418214 | 1.345354 | -1.33322 |
| C | 3.018732 | 0.034296 | -0.32522 |
| H | 3.395272 | 0.2565   | 0.688218 |
| C | 3.75488  | -1.20582 | -0.81556 |
| H | 4.841218 | -1.07922 | -0.72354 |
| H | 3.519365 | -1.38781 | -1.88292 |
| O | 1.742066 | -3.78716 | 0.473487 |

Table S54. Frequencies (cm<sup>-1</sup>) of P3B\_v2.

|      |      |      |      |      |      |      |      |
|------|------|------|------|------|------|------|------|
| 43   | 61   | 72   | 107  | 133  | 140  | 188  | 214  |
| 224  | 234  | 241  | 248  | 252  | 259  | 264  | 270  |
| 281  | 297  | 319  | 327  | 339  | 350  | 370  | 381  |
| 386  | 422  | 457  | 470  | 501  | 520  | 549  | 566  |
| 588  | 594  | 635  | 680  | 691  | 723  | 752  | 787  |
| 822  | 826  | 907  | 918  | 927  | 932. | 944  | 945  |
| 956  | 958  | 976  | 991  | 1002 | 1026 | 1034 | 1065 |
| 1091 | 1097 | 1104 | 1124 | 1130 | 1146 | 1154 | 1161 |
| 1174 | 1200 | 1210 | 1216 | 1227 | 1246 | 1249 | 1274 |
| 1296 | 1299 | 1307 | 1327 | 1350 | 1351 | 1361 | 1369 |
| 1372 | 1374 | 1384 | 1391 | 1394 | 1398 | 1412 | 1438 |
| 1441 | 1446 | 1449 | 1454 | 1458 | 1461 | 1462 | 1468 |
| 1469 | 1473 | 1474 | 1480 | 1487 | 1540 | 1660 | 1704 |
| 2824 | 3023 | 3032 | 3040 | 3043 | 3046 | 3049 | 3051 |
| 3053 | 3060 | 3118 | 3123 | 3124 | 3125 | 3129 | 3133 |
| 3135 | 3136 | 3137 | 3138 | 3147 | 3150 | 3167 | 3192 |
| 3198 |      |      |      |      |      |      |      |

### TS4B\_v1

Figure S31. The optimized structure of TS4B\_v1 transition state.

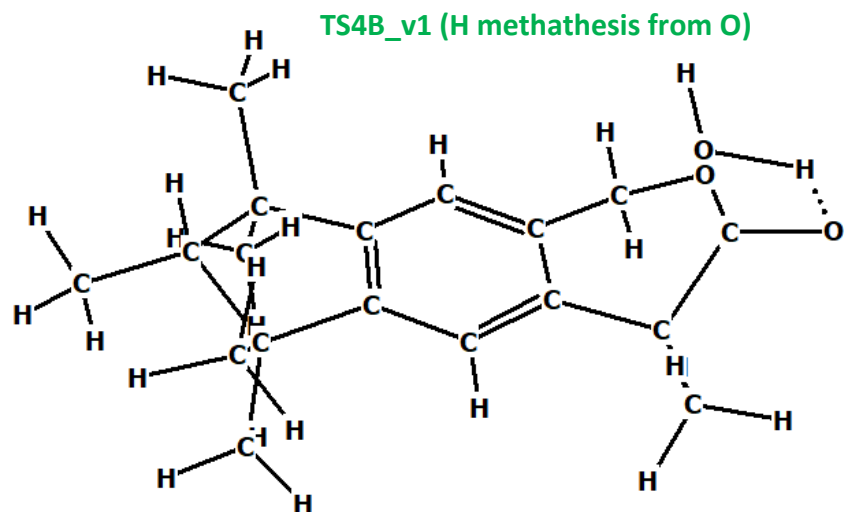

Table S55. Geometry (Å) of TS4B\_v1 transition state.

| Atom | x        | y        | z        |
|------|----------|----------|----------|
| O    | 3.576819 | -1.57555 | -0.32045 |
| C    | -3.16705 | 0.326634 | -0.46429 |
| C    | -2.19445 | 1.333925 | 0.224777 |
| C    | -2.60059 | -1.10873 | -0.22858 |
| C    | -0.90373 | 0.53564  | 0.259264 |
| C    | -1.12923 | -0.81889 | 0.008212 |
| C    | -4.63947 | 0.510788 | -0.12547 |
| C    | -2.60686 | 1.717489 | 1.654555 |
| C    | -2.0594  | 2.613576 | -0.60547 |
| C    | -3.19663 | -1.81908 | 0.996806 |
| C    | -2.82602 | -1.98981 | -1.46061 |
| C    | 0.383693 | 1.010804 | 0.513781 |
| C    | -0.06369 | -1.71922 | 0.007484 |
| C    | 1.451053 | 0.112665 | 0.528658 |
| C    | 1.221147 | -1.24706 | 0.275056 |
| C    | 2.89384  | 0.505451 | 0.755356 |
| C    | 2.423522 | -2.14451 | 0.329297 |
| C    | 3.759992 | -0.23603 | -0.25646 |
| C    | 3.174291 | 1.999112 | 0.732204 |
| H    | -3.04841 | 0.507898 | -1.54709 |
| H    | -4.84058 | 0.351903 | 0.943883 |
| H    | -4.97395 | 1.527769 | -0.38145 |
| H    | -5.26233 | -0.19611 | -0.69462 |
| H    | -1.82391 | 2.341837 | 2.1118   |
| H    | -3.54197 | 2.298169 | 1.649963 |
| H    | -2.75032 | 0.836193 | 2.295326 |
| H    | -3.03777 | 3.109982 | -0.70357 |
| H    | -1.37066 | 3.326904 | -0.12686 |
| H    | -1.68086 | 2.39056  | -1.61417 |

|   |          |          |          |
|---|----------|----------|----------|
| H | -3.08952 | -1.22491 | 1.915385 |
| H | -4.26585 | -2.03131 | 0.844026 |
| H | -2.68018 | -2.77831 | 1.155403 |
| H | -3.90334 | -2.08394 | -1.67006 |
| H | -2.33574 | -1.56083 | -2.34721 |
| H | -2.42854 | -3.00426 | -1.30133 |
| H | 0.553311 | 2.074214 | 0.694024 |
| H | -0.22216 | -2.78077 | -0.20136 |
| H | 3.21844  | 0.091874 | 1.730268 |
| H | 2.703311 | -2.34995 | 1.375889 |
| H | 2.242464 | -3.10131 | -0.17296 |
| H | 2.850048 | 2.429635 | -0.2259  |
| H | 2.642019 | 2.507539 | 1.546565 |
| H | 4.249797 | 2.175345 | 0.849722 |
| O | 4.988196 | 0.15204  | -0.49473 |
| H | 4.421732 | 0.483643 | -1.56159 |
| O | 3.240486 | 0.400809 | -1.77912 |
| H | 3.049463 | -0.35672 | -2.35841 |

Table S56. Frequencies (cm<sup>-1</sup>) of TS4B\_v1 transition state.

|      |      |      |      |      |      |       |      |
|------|------|------|------|------|------|-------|------|
| 46   | 51   | 85   | 116  | 125  | 145  | 173   | 200  |
| 212  | 229  | 236  | 245  | 250  | 257  | 269   | 276  |
| 279  | 289  | 301  | 308  | 330  | 333  | 349   | 364  |
| 369  | 392  | 402  | 443  | 475  | 488  | 515   | 530  |
| 545  | 557  | 569  | 590  | 640  | 647  | 654   | 696  |
| 725  | 772  | 797  | 807  | 833  | 838. | 868   | 884  |
| 916  | 924  | 938  | 946  | 948  | 957  | 992   | 996  |
| 1003 | 1005 | 1028 | 1043 | 1085 | 1092 | 1101  | 1106 |
| 1130 | 1158 | 1164 | 1176 | 1212 | 1218 | 1234  | 1234 |
| 1246 | 1259 | 1272 | 1287 | 1297 | 1311 | 1338  | 1347 |
| 1353 | 1361 | 1372 | 1374 | 1377 | 1385 | 1387  | 1391 |
| 1397 | 1420 | 1440 | 1444 | 1448 | 1454 | 1456  | 1457 |
| 1459 | 1463 | 1464 | 1469 | 1471 | 1478 | 1481  | 1499 |
| 1504 | 1548 | 1670 | 1709 | 2036 | 3027 | 3029  | 3041 |
| 3045 | 3049 | 3053 | 3058 | 3070 | 3071 | 3122  | 3122 |
| 3128 | 3128 | 3131 | 3133 | 3142 | 3142 | 3144  | 3157 |
| 3157 | 3158 | 3171 | 3185 | 3198 | 3784 | -1667 |      |

### TS4B\_v2

Figure S32. The optimized structure of TS4B\_v2 transition state.

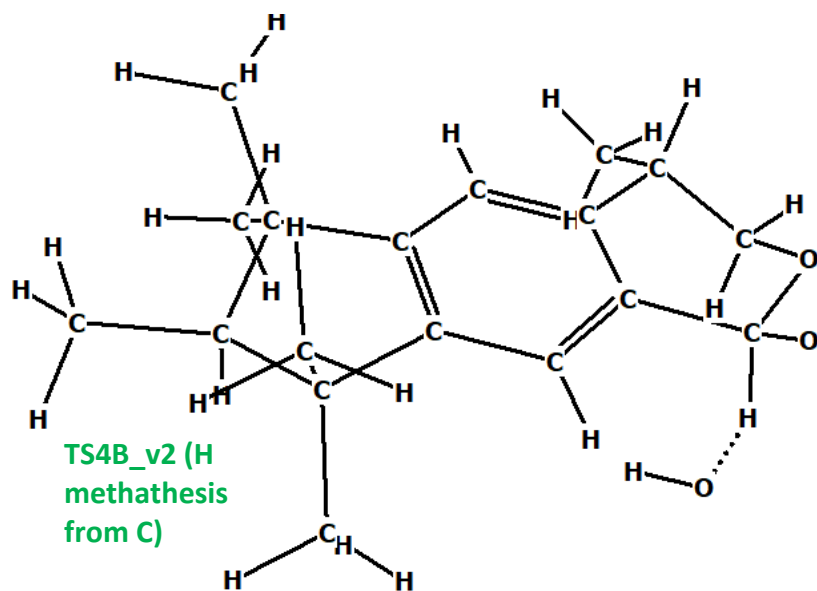

Table S57. Geometry (Å) of TS4B\_v2 transition state.

| Atom | x        | y        | z        |
|------|----------|----------|----------|
| O    | 4.002443 | -0.38071 | -0.38233 |
| C    | -3.13023 | 0.135556 | -0.45293 |
| C    | -2.3034  | 1.248531 | 0.266366 |
| C    | -2.23964 | -1.14559 | -0.5162  |
| C    | -0.8817  | 0.776289 | 0.026234 |
| C    | -0.84814 | -0.55113 | -0.40819 |
| C    | -4.53701 | -0.07859 | 0.087328 |
| C    | -2.56769 | 1.341835 | 1.777443 |
| C    | -2.57046 | 2.618028 | -0.36482 |
| C    | -2.47634 | -2.12726 | 0.642347 |
| C    | -2.4465  | -1.88886 | -1.83854 |
| C    | 0.295635 | 1.502254 | 0.193712 |
| C    | 0.372663 | -1.16296 | -0.66357 |
| C    | 1.538925 | 0.908593 | -0.05443 |
| C    | 1.554697 | -0.43272 | -0.47982 |
| C    | 2.889518 | -1.11593 | -0.78355 |
| C    | 2.720513 | 3.148888 | -0.34675 |
| H    | -3.22112 | 0.475469 | -1.4995  |
| H    | -4.52779 | -0.42141 | 1.13185  |
| H    | -5.11785 | 0.855309 | 0.043739 |
| H    | -5.07352 | -0.8312  | -0.51034 |
| H    | -1.88176 | 2.074621 | 2.229713 |
| H    | -3.59742 | 1.677814 | 1.971878 |
| H    | -2.41519 | 0.379674 | 2.286427 |
| H    | -1.99519 | 3.408774 | 0.141009 |
| H    | -2.29939 | 2.619809 | -1.43112 |
| H    | -3.63795 | 2.874559 | -0.27783 |

|   |          |          |          |
|---|----------|----------|----------|
| H | -2.37013 | -1.64555 | 1.624665 |
| H | -3.48257 | -2.56859 | 0.579773 |
| H | -1.74345 | -2.94712 | 0.589126 |
| H | -3.49537 | -2.21078 | -1.93481 |
| H | -2.20153 | -1.24421 | -2.69561 |
| H | -1.81578 | -2.78971 | -1.89074 |
| H | 0.248472 | 2.545856 | 0.510777 |
| H | 0.428652 | -2.19747 | -1.00869 |
| H | 2.962768 | -1.27652 | -1.93602 |
| H | 2.317838 | 3.23511  | -1.36746 |
| H | 2.06795  | 3.713509 | 0.331193 |
| H | 3.711005 | 3.626491 | -0.32367 |
| C | 2.840994 | 1.683766 | 0.066688 |
| H | 3.176483 | 1.634421 | 1.116788 |
| C | 3.901015 | 0.982117 | -0.77192 |
| H | 4.892249 | 1.424188 | -0.61452 |
| H | 3.649555 | 1.04231  | -1.84784 |
| O | 2.816289 | -2.2999  | -0.14366 |
| O | 2.771614 | -0.86072 | -3.38168 |
| H | 1.906814 | -0.43122 | -3.21799 |

Table S58. Frequencies (cm<sup>-1</sup>) of TS4B\_v2 transition state.

|      |      |      |      |      |      |       |      |
|------|------|------|------|------|------|-------|------|
| 34   | 36   | 61   | 66   | 102  | 109  | 132   | 142  |
| 185  | 210  | 226  | 230  | 237  | 241  | 252   | 256  |
| 260  | 264  | 274  | 280  | 290  | 318  | 328   | 328  |
| 346  | 370  | 378  | 384  | 416  | 442  | 461   | 500  |
| 524  | 537  | 552  | 569  | 587  | 625  | 639   | 685  |
| 704  | 722  | 753  | 774  | 797  | 824  | 831   | 908  |
| 914  | 917  | 936  | 944  | 945  | 953  | 958   | 982  |
| 990  | 1006 | 1028 | 1044 | 1071 | 1091 | 1104  | 1122 |
| 1133 | 1143 | 1161 | 1162 | 1173 | 1204 | 1212  | 1215 |
| 1224 | 1243 | 1249 | 1272 | 1294 | 1300 | 1308  | 1327 |
| 1350 | 1352 | 1358 | 1365 | 1374 | 1377 | 1388  | 1389 |
| 1392 | 1397 | 1407 | 1440 | 1444 | 1446 | 1447  | 1454 |
| 1458 | 1458 | 1462 | 1467 | 1469 | 1472 | 1475  | 1476 |
| 1482 | 1533 | 1643 | 1684 | 1726 | 3038 | 3041  | 3047 |
| 3047 | 3048 | 3050 | 3054 | 3061 | 3065 | 3121  | 3122 |
| 3127 | 3129 | 3130 | 3136 | 3138 | 3140 | 3142  | 3147 |
| 3150 | 3157 | 3169 | 3195 | 3198 | 3718 | -1169 |      |

### ProductB

Figure S33. The optimized structure of ProductB.

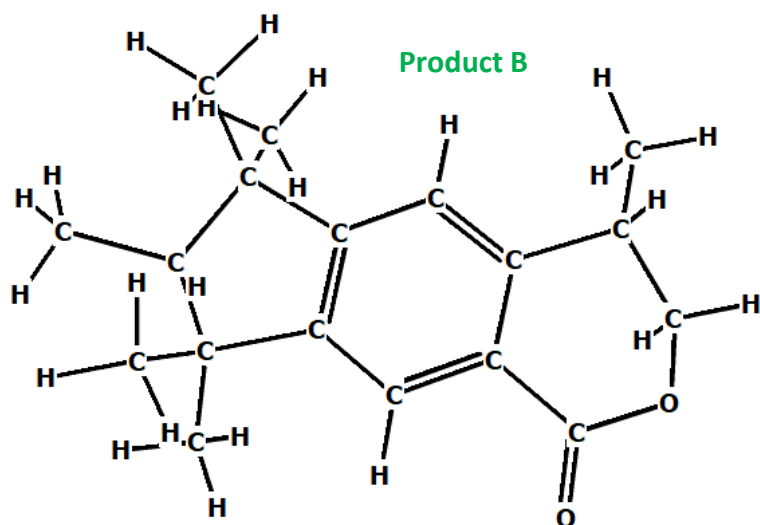

Table S59. Geometry (Å) of ProductB.

| Atom | x        | y        | z        |
|------|----------|----------|----------|
| O    | 3.340787 | -2.45583 | -0.44268 |
| C    | -3.14807 | 0.455329 | -0.17332 |
| C    | -1.93444 | 1.406476 | 0.072325 |
| C    | -2.70123 | -0.98771 | 0.219448 |
| C    | -0.76636 | 0.441292 | -0.00512 |
| C    | -1.1942  | -0.88831 | 0.074482 |
| C    | -4.46617 | 0.91502  | 0.433023 |
| C    | -1.94553 | 2.087997 | 1.449795 |
| C    | -1.86144 | 2.486629 | -1.01072 |
| C    | -3.05854 | -1.38041 | 1.661628 |
| C    | -3.30442 | -2.02301 | -0.73396 |
| C    | 0.587531 | 0.754006 | -0.11785 |
| C    | -0.26312 | -1.91794 | 0.042019 |
| C    | 1.535819 | -0.27182 | -0.15924 |
| C    | 1.095494 | -1.60547 | -0.08356 |
| C    | 2.072272 | -2.72966 | -0.08425 |
| C    | 3.401692 | 1.296246 | -0.92453 |
| H    | -3.27498 | 0.428941 | -1.26979 |
| H    | -4.41779 | 0.968869 | 1.530091 |
| H    | -4.74165 | 1.912609 | 0.058288 |
| H    | -5.27945 | 0.223762 | 0.164441 |
| H    | -1.01477 | 2.659082 | 1.58939  |
| H    | -2.78879 | 2.79066  | 1.529751 |
| H    | -2.02051 | 1.361389 | 2.271049 |
| H    | -1.00858 | 3.162267 | -0.8431  |
| H    | -1.75702 | 2.037203 | -2.00944 |
| H    | -2.77758 | 3.097673 | -0.99922 |
| H    | -2.67176 | -0.66078 | 2.39705  |
| H    | -4.14948 | -1.45249 | 1.788182 |



|   |          |          |          |
|---|----------|----------|----------|
| H | -2.62548 | -2.36505 | 1.896008 |
| H | -4.40431 | -1.99225 | -0.68408 |
| H | -2.9983  | -1.8279  | -1.7724  |
| H | -2.98601 | -3.04193 | -0.46478 |
| H | 0.904786 | 1.796562 | -0.17881 |
| H | -0.55737 | -2.96713 | 0.108553 |
| H | 2.933281 | 1.39289  | -1.91582 |
| H | 3.083605 | 2.147567 | -0.30907 |
| H | 4.491939 | 1.36323  | -1.04656 |
| C | 3.0262   | -0.03069 | -0.27334 |
| H | 3.458827 | -0.06505 | 0.742279 |
| C | 3.620524 | -1.1883  | -1.05601 |
| H | 4.714174 | -1.12574 | -1.09427 |
| H | 3.226731 | -1.19602 | -2.08613 |
| O | 1.79032  | -3.86042 | 0.239362 |

Table S60. Frequencies (cm<sup>-1</sup>) of ProductB.

|      |      |      |      |      |      |      |      |
|------|------|------|------|------|------|------|------|
| 44   | 62   | 87   | 111  | 134  | 146  | 193  | 220  |
| 227  | 232  | 240  | 242  | 251  | 258  | 264  | 273  |
| 281  | 297  | 326  | 330  | 338  | 347  | 370  | 384  |
| 404  | 433  | 484  | 494  | 525  | 532  | 549  | 583  |
| 607  | 642  | 663  | 707  | 721  | 758  | 780  | 820  |
| 822  | 826  | 909  | 918  | 930  | 944. | 945  | 949  |
| 956  | 965  | 978  | 991  | 1002 | 1026 | 1072 | 1084 |
| 1092 | 1102 | 1119 | 1144 | 1150 | 1161 | 1176 | 1207 |
| 1216 | 1224 | 1239 | 1244 | 1262 | 1277 | 1295 | 1324 |
| 1329 | 1352 | 1352 | 1367 | 1372 | 1374 | 1377 | 1385 |
| 1391 | 1396 | 1397 | 1427 | 1440 | 1444 | 1447 | 1454 |
| 1455 | 1458 | 1463 | 1463 | 1468 | 1472 | 1477 | 1478 |
| 1479 | 1499 | 1537 | 1658 | 1702 | 1836 | 3039 | 3042 |
| 3044 | 3047 | 3052 | 3054 | 3060 | 3062 | 3079 | 3120 |
| 3124 | 3125 | 3128 | 3130 | 3130 | 3137 | 3140 | 3143 |
| 3149 | 3151 | 3158 | 3169 | 3201 | 3206 |      |      |

Figure S34. The optimized structure of TS1C\_v1 transition state.

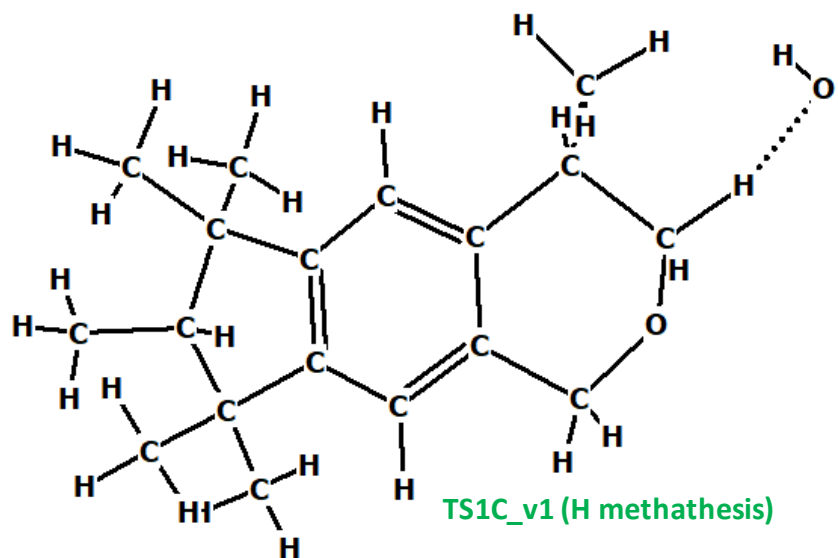

Table S61. Geometry (Å) of TS1C\_v1 transition state.

| Atom | x        | y        | z        |
|------|----------|----------|----------|
| O    | 3.782473 | 0.268871 | -0.27314 |
| C    | -3.33928 | -0.41606 | -0.26376 |
| C    | -2.69405 | 0.755605 | 0.542163 |
| C    | -2.24031 | -1.50677 | -0.47021 |
| C    | -1.22112 | 0.568363 | 0.22386  |
| C    | -0.97029 | -0.68701 | -0.33593 |
| C    | -4.6673  | -0.92625 | 0.277463 |
| C    | -2.91619 | 0.661558 | 2.059379 |
| C    | -3.22383 | 2.106714 | 0.053615 |
| C    | -2.25927 | -2.61787 | 0.590875 |
| C    | -2.36735 | -2.14987 | -1.85409 |
| C    | -0.17685 | 1.460907 | 0.443883 |
| C    | 0.329628 | -1.05167 | -0.66809 |
| C    | 1.138593 | 1.108283 | 0.109537 |
| C    | 1.385199 | -0.15998 | -0.44426 |
| C    | 2.297698 | 2.069021 | 0.345854 |
| C    | 2.788544 | -0.57135 | -0.83581 |
| C    | 3.472228 | 1.611914 | -0.49948 |
| C    | 1.973291 | 3.532165 | 0.056993 |
| H    | -3.52656 | -0.00276 | -1.27047 |
| H    | -4.56293 | -1.36484 | 1.280416 |
| H    | -5.40174 | -0.10889 | 0.341429 |
| H    | -5.0883  | -1.69844 | -0.38451 |
| H    | -2.35661 | 1.463016 | 2.566093 |
| H    | -3.98149 | 0.783305 | 2.308241 |
| H    | -2.57228 | -0.29837 | 2.470154 |
| H    | -2.77149 | 2.937245 | 0.617602 |
| H    | -3.00386 | 2.253864 | -1.01432 |

|   |          |          |          |
|---|----------|----------|----------|
| H | -4.31501 | 2.164198 | 0.1938   |
| H | -2.20002 | -2.21672 | 1.61254  |
| H | -3.17484 | -3.22318 | 0.508757 |
| H | -1.39725 | -3.28676 | 0.442828 |
| H | -3.34877 | -2.63862 | -1.9605  |
| H | -2.26807 | -1.39576 | -2.64903 |
| H | -1.59369 | -2.91837 | -2.00754 |
| H | -0.38123 | 2.441611 | 0.879757 |
| H | 0.539363 | -2.03354 | -1.10348 |
| H | 2.603432 | 1.973477 | 1.403013 |
| H | 3.003056 | -1.588   | -0.48023 |
| H | 2.882734 | -0.5716  | -1.93873 |
| H | 3.312703 | 1.820501 | -1.57715 |
| H | 4.415623 | 2.237352 | -0.21253 |
| H | 1.585178 | 3.65093  | -0.96638 |
| H | 1.228716 | 3.933572 | 0.75653  |
| H | 2.890786 | 4.129999 | 0.157329 |
| O | 5.317419 | 3.133831 | 0.456711 |
| H | 5.058163 | 2.864883 | 1.361359 |

Table S62. Frequencies (cm<sup>-1</sup>) of TS1C\_v1 transition state.

|      |      |      |      |      |      |      |      |
|------|------|------|------|------|------|------|------|
| 30   | 46   | 72   | 90   | 105  | 118  | 153  | 156  |
| 207  | 225  | 234  | 236  | 243  | 249  | 255  | 261  |
| 270  | 275  | 280  | 296  | 301  | 329  | 333  | 346  |
| 365  | 378  | 387  | 417  | 448  | 474  | 511  | 526  |
| 549  | 557  | 588  | 626  | 671  | 680  | 723  | 766  |
| 772  | 785  | 825  | 832  | 885  | 907. | 908  | 915  |
| 936  | 944  | 946  | 956  | 990  | 992  | 1005 | 1016 |
| 1018 | 1028 | 1060 | 1089 | 1093 | 1105 | 1138 | 1154 |
| 1155 | 1162 | 1181 | 1211 | 1214 | 1218 | 1232 | 1245 |
| 1254 | 1265 | 1296 | 1297 | 1311 | 1325 | 1351 | 1352 |
| 1369 | 1372 | 1374 | 1377 | 1383 | 1386 | 1388 | 1392 |
| 1399 | 1412 | 1438 | 1443 | 1446 | 1450 | 1455 | 1457 |
| 1459 | 1461 | 1463 | 1466 | 1468 | 1474 | 1479 | 1489 |
| 1537 | 1559 | 1662 | 1706 | 3013 | 3020 | 3035 | 3039 |
| 3043 | 3043 | 3047 | 3052 | 3054 | 3055 | 3119 | 3122 |
| 3122 | 3125 | 3127 | 3128 | 3129 | 3138 | 3139 | 3140 |
| 3148 | 3150 | 3155 | 3165 | 3184 | 3726 | -862 |      |

### TS1C\_v2

Figure S35. The optimized structure of TS1C\_v2 transition state.

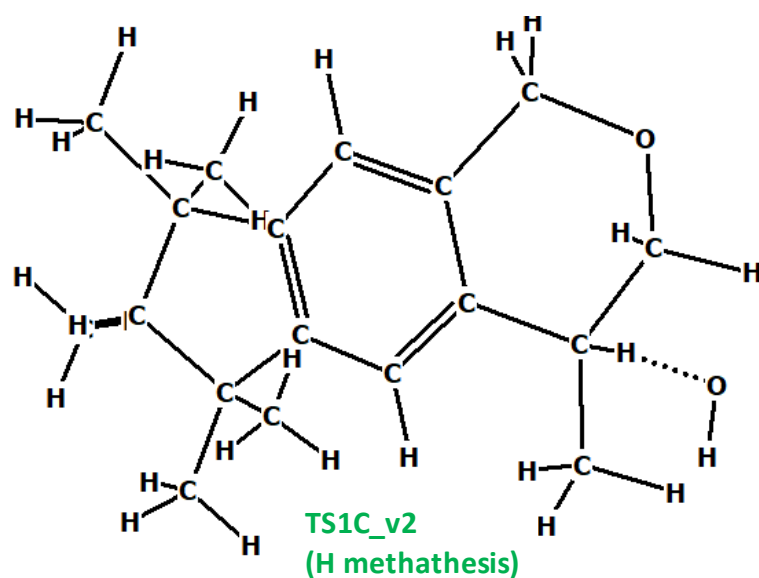

Table S63. Geometry (Å) of TS1C\_v2 transition state.

| Atom | x        | y        | z        |
|------|----------|----------|----------|
| O    | 3.57463  | -1.96571 | -0.07899 |
| C    | -3.15054 | 0.462376 | -0.13876 |
| C    | -1.98237 | 1.484311 | 0.034952 |
| C    | -2.60469 | -0.94686 | 0.256037 |
| C    | -0.76766 | 0.581191 | -0.08322 |
| C    | -1.11433 | -0.7678  | 0.035302 |
| C    | -4.46336 | 0.859576 | 0.521536 |
| C    | -1.97397 | 2.193589 | 1.398328 |
| C    | -2.02213 | 2.545433 | -1.06793 |
| C    | -2.87325 | -1.32592 | 1.720714 |
| C    | -3.19606 | -2.03329 | -0.64643 |
| C    | 0.560453 | 0.951046 | -0.26207 |
| C    | -0.12892 | -1.74781 | -0.02416 |
| C    | 1.564513 | -0.02757 | -0.33235 |
| C    | 1.209491 | -1.38325 | -0.20331 |
| C    | 2.269949 | -2.45844 | -0.29364 |
| C    | 3.265518 | 1.516538 | -1.46529 |
| H    | -3.32673 | 0.407994 | -1.22747 |
| H    | -4.36648 | 0.940979 | 1.613719 |
| H    | -4.81261 | 1.83201  | 0.142185 |
| H    | -5.24848 | 0.118461 | 0.307179 |
| H    | -1.06943 | 2.815114 | 1.486776 |
| H    | -2.8485  | 2.853743 | 1.503046 |
| H    | -1.97531 | 1.482382 | 2.236471 |
| H    | -1.19757 | 3.266481 | -0.95618 |
| H    | -1.94376 | 2.082236 | -2.06288 |
| H    | -2.96699 | 3.110071 | -1.02245 |
| H    | -2.49506 | -0.56803 | 2.421422 |

|   |          |          |          |
|---|----------|----------|----------|
| H | -3.95172 | -1.45461 | 1.898906 |
| H | -2.37443 | -2.27899 | 1.954777 |
| H | -4.29208 | -2.06337 | -0.54127 |
| H | -2.95433 | -1.8436  | -1.7029  |
| H | -2.80815 | -3.02767 | -0.37542 |
| H | 0.823945 | 2.007537 | -0.35006 |
| H | -0.38895 | -2.80636 | 0.071797 |
| H | 2.093608 | -3.22946 | 0.46842  |
| H | 2.212406 | -2.94857 | -1.28598 |
| H | 2.85567  | 1.303906 | -2.46504 |
| H | 2.80674  | 2.445466 | -1.10134 |
| H | 4.346717 | 1.693529 | -1.56583 |
| O | 4.52164  | 1.187714 | 1.452477 |
| H | 4.504068 | 2.085195 | 1.062499 |
| C | 3.013538 | 0.345088 | -0.52642 |
| H | 3.421694 | 0.632473 | 0.509653 |
| C | 3.842612 | -0.86689 | -0.92386 |
| H | 4.91197  | -0.6387  | -0.82342 |
| H | 3.634967 | -1.13311 | -1.98086 |

Table S64. Frequencies (cm<sup>-1</sup>) of TS1C\_v2 transition state.

|      |      |      |      |      |      |      |      |
|------|------|------|------|------|------|------|------|
| 33   | 46   | 69   | 87   | 100  | 120  | 141  | 153  |
| 191  | 212  | 221  | 231  | 241  | 242  | 253  | 262  |
| 270  | 275  | 278  | 297  | 319  | 328  | 333  | 344  |
| 373  | 378  | 389  | 412  | 447  | 481  | 515  | 525  |
| 547  | 560  | 583  | 626  | 633  | 681  | 691  | 722  |
| 770  | 787  | 824  | 834  | 878  | 908. | 912  | 934  |
| 941  | 944  | 947  | 956  | 976  | 991  | 992  | 1005 |
| 1021 | 1027 | 1035 | 1091 | 1102 | 1104 | 1124 | 1151 |
| 1158 | 1163 | 1193 | 1212 | 1216 | 1230 | 1244 | 1252 |
| 1255 | 1272 | 1292 | 1298 | 1323 | 1328 | 1350 | 1352 |
| 1367 | 1374 | 1376 | 1381 | 1387 | 1388 | 1391 | 1397 |
| 1412 | 1436 | 1442 | 1446 | 1449 | 1452 | 1455 | 1456 |
| 1459 | 1462 | 1465 | 1467 | 1470 | 1475 | 1476 | 1491 |
| 1541 | 1655 | 1702 | 1897 | 3007 | 3011 | 3042 | 3044 |
| 3045 | 3046 | 3050 | 3054 | 3061 | 3122 | 3124 | 3126 |
| 3126 | 3128 | 3132 | 3133 | 3136 | 3138 | 3140 | 3141 |
| 3142 | 3146 | 3156 | 3163 | 3183 | 3724 | -543 |      |

P2C\_v1

Figure S36. The optimized structure of P2C\_v1.

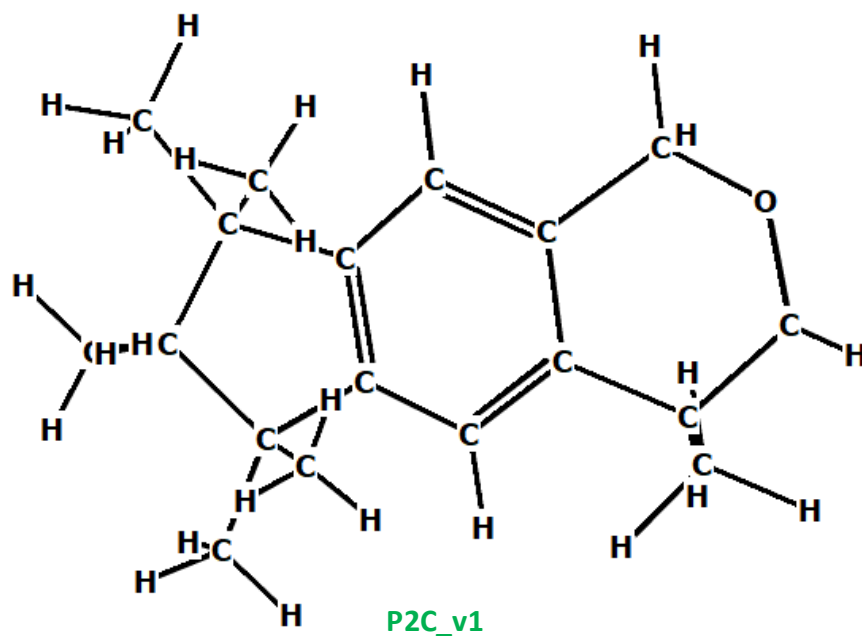

Table S65. Geometry (Å) of P2C\_v1.

| Atom | x        | y        | z        |
|------|----------|----------|----------|
| O    | 3.901266 | -1.2057  | 0.882491 |
| C    | -2.87626 | 0.197928 | -0.40719 |
| C    | -1.96031 | 1.321231 | 0.172429 |
| C    | -2.13363 | -1.16048 | -0.21247 |
| C    | -0.59046 | 0.67131  | 0.089013 |
| C    | -0.68713 | -0.70558 | -0.12893 |
| C    | -4.32142 | 0.22546  | 0.070248 |
| C    | -2.27422 | 1.690418 | 1.630554 |
| C    | -2.05007 | 2.588321 | -0.68282 |
| C    | -2.5217  | -1.90184 | 1.076342 |
| C    | -2.37911 | -2.09057 | -1.40382 |
| C    | 0.656351 | 1.278309 | 0.233187 |
| C    | 0.463919 | -1.48816 | -0.20144 |
| C    | 1.816255 | 0.503143 | 0.142736 |
| C    | 1.713863 | -0.87815 | -0.07622 |
| C    | 3.203252 | 1.10529  | 0.23228  |
| C    | 3.004818 | -1.65019 | -0.13371 |
| C    | 4.172063 | 0.130875 | 0.856999 |
| C    | 3.671678 | 1.580219 | -1.15936 |
| H    | -2.88236 | 0.3673   | -1.49835 |
| H    | -4.40109 | 0.071954 | 1.156226 |
| H    | -4.79333 | 1.191246 | -0.16735 |
| H    | -4.91051 | -0.56135 | -0.42522 |
| H    | -1.52684 | 2.409672 | 1.999798 |
| H    | -3.26539 | 2.162348 | 1.711713 |
| H    | -2.25261 | 0.814354 | 2.294108 |

|   |          |          |          |
|---|----------|----------|----------|
| H | -1.40182 | 3.38374  | -0.2837  |
| H | -1.74895 | 2.384879 | -1.72133 |
| H | -3.08277 | 2.971394 | -0.69037 |
| H | -2.38989 | -1.27558 | 1.970229 |
| H | -3.57037 | -2.23446 | 1.037854 |
| H | -1.88833 | -2.79465 | 1.19503  |
| H | -3.454   | -2.30989 | -1.5032  |
| H | -2.03077 | -1.63123 | -2.34094 |
| H | -1.85428 | -3.04966 | -1.273   |
| H | 0.738167 | 2.354862 | 0.41114  |
| H | 0.399473 | -2.56964 | -0.35217 |
| H | 3.161125 | 1.99387  | 0.881924 |
| H | 2.84096  | -2.71973 | 0.042713 |
| H | 3.496632 | -1.53014 | -1.11631 |
| H | 4.790541 | 0.425362 | 1.705356 |
| H | 3.698231 | 0.738911 | -1.86876 |
| H | 2.986651 | 2.345092 | -1.55517 |
| H | 4.682562 | 2.008488 | -1.09542 |

Table S66. Frequencies (cm<sup>-1</sup>) of P2C\_v1.

|      |      |      |      |      |      |      |      |
|------|------|------|------|------|------|------|------|
| 57   | 61   | 93   | 114  | 147  | 157  | 177  | 216  |
| 230  | 235  | 250  | 261  | 262  | 268  | 286  | 291  |
| 300  | 312  | 318  | 330  | 350  | 356  | 373  | 391  |
| 416  | 456  | 492  | 517  | 535  | 553  | 561  | 576  |
| 607  | 651  | 701  | 714  | 757  | 779  | 805  | 821  |
| 842  | 909  | 914  | 922  | 934  | 945. | 946  | 954  |
| 965  | 991  | 1002 | 1010 | 1021 | 1026 | 1037 | 1065 |
| 1091 | 1100 | 1102 | 1149 | 1160 | 1187 | 1208 | 1215 |
| 1222 | 1246 | 1250 | 1268 | 1287 | 1296 | 1304 | 1317 |
| 1342 | 1350 | 1352 | 1366 | 1367 | 1372 | 1374 | 1374 |
| 1384 | 1390 | 1396 | 1429 | 1439 | 1443 | 1448 | 1452 |
| 1453 | 1454 | 1458 | 1462 | 1463 | 1469 | 1473 | 1476 |
| 1481 | 1501 | 1540 | 1666 | 1704 | 3032 | 3040 | 3041 |
| 3041 | 3048 | 3050 | 3051 | 3054 | 3076 | 3117 | 3118 |
| 3122 | 3128 | 3130 | 3135 | 3135 | 3138 | 3140 | 3144 |
| 3146 | 3148 | 3149 | 3176 | 3185 | 3216 |      |      |

### P2C\_v2

Figure S37. The optimized structure of P2C\_v2.

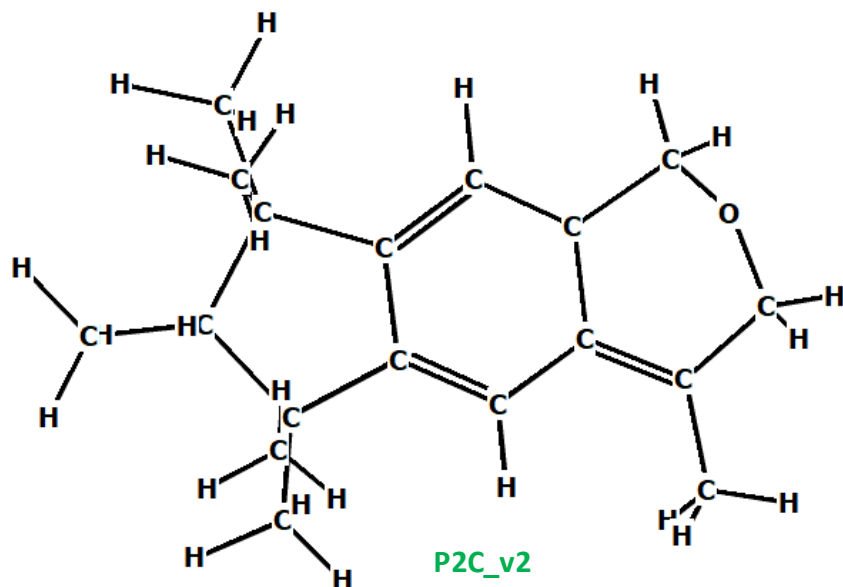

Table S67. Geometry (Å) of P2C\_v2.

| Atom | x        | y        | z        |
|------|----------|----------|----------|
| O    | 3.978328 | -1.34982 | 0.502257 |
| C    | -2.88653 | 0.135483 | -0.45258 |
| C    | -1.90922 | 1.28595  | -0.05557 |
| C    | -2.18136 | -1.2166  | -0.11891 |
| C    | -0.56515 | 0.579926 | -0.11325 |
| C    | -0.72036 | -0.81132 | -0.14617 |
| C    | -4.30762 | 0.275343 | 0.075043 |
| C    | -2.14645 | 1.840754 | 1.357149 |
| C    | -1.99761 | 2.441896 | -1.05572 |
| C    | -2.54373 | -1.78316 | 1.263509 |
| C    | -2.5071  | -2.27371 | -1.17858 |
| C    | 0.6967   | 1.156064 | -0.10618 |
| C    | 0.406317 | -1.64209 | -0.16827 |
| C    | 1.853362 | 0.331363 | -0.13452 |
| C    | 1.677177 | -1.08527 | -0.16951 |
| C    | 3.172498 | 0.85642  | -0.14823 |
| C    | 2.925246 | -1.92627 | -0.24759 |
| C    | 4.334335 | -0.08319 | -0.00879 |
| C    | 3.462225 | 2.315953 | -0.27767 |
| H    | -2.93595 | 0.168817 | -1.55524 |
| H    | -4.34588 | 0.242464 | 1.17354  |
| H    | -4.75225 | 1.228684 | -0.24945 |
| H    | -4.9473  | -0.53509 | -0.30684 |
| H    | -1.36384 | 2.57535  | 1.602413 |
| H    | -3.12044 | 2.349732 | 1.420909 |
| H    | -2.11767 | 1.051707 | 2.122146 |
| H    | -1.30973 | 3.257009 | -0.78217 |



|   |          |          |          |
|---|----------|----------|----------|
| H | -1.74571 | 2.103741 | -2.07199 |
| H | -3.01769 | 2.85753  | -1.07155 |
| H | -2.36149 | -1.05798 | 2.069123 |
| H | -3.6024  | -2.08299 | 1.300144 |
| H | -1.93292 | -2.67551 | 1.470876 |
| H | -3.59185 | -2.46288 | -1.21012 |
| H | -2.18361 | -1.94302 | -2.1768  |
| H | -2.00841 | -3.22908 | -0.95271 |
| H | 0.808482 | 2.242365 | -0.07275 |
| H | 0.294822 | -2.73034 | -0.19122 |
| H | 2.750176 | -2.92906 | 0.163391 |
| H | 3.241009 | -2.04047 | -1.30443 |
| H | 4.846649 | -0.19668 | -0.99058 |
| H | 5.076129 | 0.33773  | 0.687861 |
| H | 2.880794 | 2.778648 | -1.09008 |
| H | 3.207817 | 2.862445 | 0.648167 |
| H | 4.528715 | 2.489549 | -0.4782  |

Table S68. Frequencies (cm<sup>-1</sup>) of P2C\_v2.

|      |      |      |      |      |      |      |      |
|------|------|------|------|------|------|------|------|
| 50   | 63   | 96   | 107  | 120  | 146  | 150  | 192  |
| 227  | 231  | 241  | 244  | 256  | 268  | 272  | 285  |
| 308  | 311  | 327  | 329  | 348  | 354  | 374  | 392  |
| 421  | 435  | 474  | 510  | 532  | 550  | 559  | 586  |
| 628  | 648  | 694  | 721  | 767  | 786  | 820  | 836  |
| 888  | 910  | 916  | 936  | 942  | 943. | 951  | 954  |
| 988  | 990  | 1002 | 1008 | 1022 | 1026 | 1043 | 1089 |
| 1100 | 1104 | 1152 | 1160 | 1176 | 1201 | 1208 | 1217 |
| 1236 | 1238 | 1243 | 1277 | 1292 | 1306 | 1311 | 1343 |
| 1350 | 1352 | 1367 | 1369 | 1372 | 1372 | 1384 | 1386 |
| 1389 | 1397 | 1431 | 1438 | 1442 | 1443 | 1444 | 1447 |
| 1452 | 1454 | 1458 | 1459 | 1461 | 1464 | 1468 | 1475 |
| 1481 | 1494 | 1530 | 1614 | 1667 | 2951 | 3001 | 3021 |
| 3035 | 3036 | 3037 | 3047 | 3050 | 3056 | 3093 | 3095 |
| 3114 | 3116 | 3122 | 3125 | 3128 | 3128 | 3132 | 3136 |
| 3139 | 3140 | 3141 | 3151 | 3174 | 3195 |      |      |

### TS2C\_v1

Figure S38. The optimized structure of TS2C\_v1 transition state.

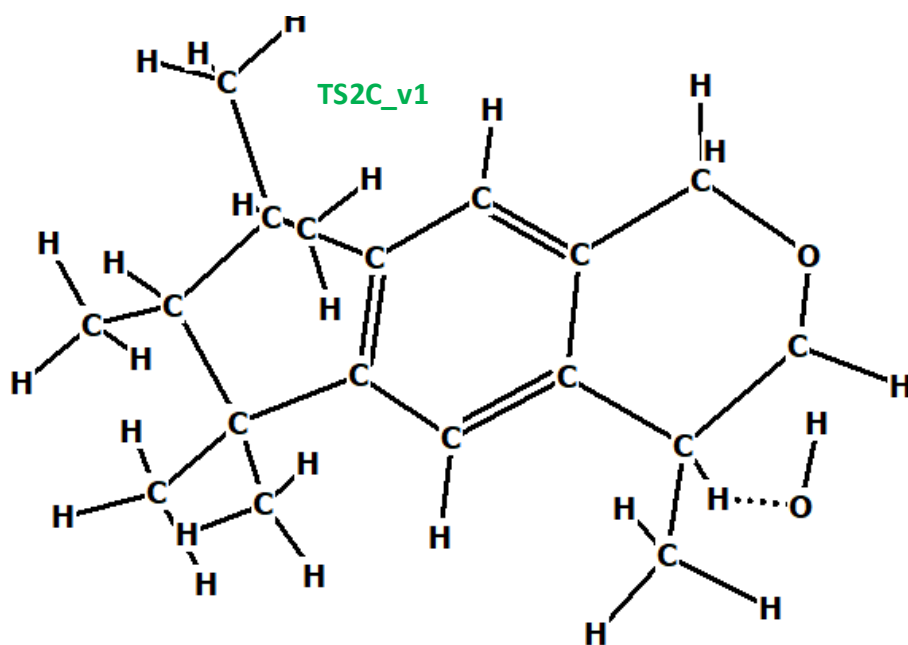

Table S69. Geometry (Å) of TS2C\_v1 transition state.

| Atom | x        | y        | z        |
|------|----------|----------|----------|
| O    | 3.662132 | -1.8072  | -0.30887 |
| C    | -3.16143 | 0.44439  | -0.12265 |
| C    | -2.02764 | 1.513399 | -0.0195  |
| C    | -2.55632 | -0.92735 | 0.313003 |
| C    | -0.7841  | 0.649792 | -0.13356 |
| C    | -1.07917 | -0.70604 | 0.047111 |
| C    | -4.4726  | 0.819702 | 0.553412 |
| C    | -2.01251 | 2.276568 | 1.314042 |
| C    | -2.13229 | 2.526739 | -1.16256 |
| C    | -2.77211 | -1.25899 | 1.798086 |
| C    | -3.13066 | -2.0683  | -0.53114 |
| C    | 0.523174 | 1.059067 | -0.36147 |
| C    | -0.06257 | -1.65278 | -0.00146 |
| C    | 1.559177 | 0.111666 | -0.42079 |
| C    | 1.25729  | -1.24802 | -0.23211 |
| C    | 2.328016 | -2.30898 | -0.3122  |
| C    | 3.839976 | -0.66411 | -1.03769 |
| C    | 3.226995 | 1.702522 | -1.5623  |
| H    | -3.3611  | 0.340104 | -1.20364 |
| H    | -4.3571  | 0.938444 | 1.640351 |
| H    | -4.86131 | 1.767172 | 0.149941 |
| H    | -5.23681 | 0.046876 | 0.378891 |
| H    | -1.13309 | 2.937918 | 1.352449 |
| H    | -2.91136 | 2.90344  | 1.416689 |
| H    | -1.96175 | 1.600126 | 2.179066 |
| H    | -1.33207 | 3.280454 | -1.10028 |

|   |          |          |          |
|---|----------|----------|----------|
| H | -2.06079 | 2.026504 | -2.1399  |
| H | -3.09592 | 3.058299 | -1.11469 |
| H | -2.40641 | -0.46094 | 2.459587 |
| H | -3.83964 | -1.42284 | 2.010384 |
| H | -2.23064 | -2.18253 | 2.054985 |
| H | -4.2223  | -2.12905 | -0.39823 |
| H | -2.92003 | -1.91341 | -1.59977 |
| H | -2.70389 | -3.03802 | -0.23137 |
| H | 0.747691 | 2.11896  | -0.4985  |
| H | -0.28261 | -2.71521 | 0.13948  |
| H | 2.257756 | -2.988   | 0.547305 |
| H | 2.186344 | -2.90666 | -1.22912 |
| H | 4.895442 | -0.48812 | -1.25993 |
| H | 2.849065 | 1.475627 | -2.57214 |
| H | 2.734618 | 2.613716 | -1.20089 |
| H | 4.304386 | 1.90782  | -1.63546 |
| O | 4.281339 | 0.502714 | 1.527012 |
| H | 4.205104 | -0.46773 | 1.417796 |
| C | 2.986133 | 0.514812 | -0.64672 |
| H | 3.402842 | 0.816813 | 0.416176 |

Table S70. Frequencies (cm<sup>-1</sup>) of TS2C\_v1 transition state.

|      |      |      |      |      |      |      |      |
|------|------|------|------|------|------|------|------|
| 32   | 40   | 71   | 82   | 108  | 136  | 146  | 167  |
| 184  | 212  | 223  | 234  | 238  | 247  | 258  | 267  |
| 273  | 275  | 288  | 295  | 324  | 330  | 339  | 355  |
| 378  | 384  | 392  | 414  | 448  | 476  | 488  | 523  |
| 548  | 558  | 580  | 586  | 650  | 674  | 679  | 723  |
| 777  | 788  | 805  | 823  | 838  | 868. | 912  | 920  |
| 926  | 939  | 943  | 945  | 954  | 984  | 992  | 1005 |
| 1016 | 1028 | 1033 | 1047 | 1090 | 1100 | 1106 | 1156 |
| 1161 | 1164 | 1197 | 1207 | 1216 | 1218 | 1243 | 1258 |
| 1263 | 1279 | 1292 | 1301 | 1330 | 1351 | 1351 | 1361 |
| 1372 | 1374 | 1378 | 1386 | 1388 | 1393 | 1397 | 1417 |
| 1437 | 1441 | 1442 | 1445 | 1453 | 1455 | 1460 | 1460 |
| 1461 | 1466 | 1467 | 1474 | 1476 | 1492 | 1544 | 1657 |
| 1696 | 1747 | 3035 | 3038 | 3039 | 3049 | 3050 | 3050 |
| 3053 | 3062 | 3118 | 3119 | 3126 | 3128 | 3130 | 3130 |
| 3130 | 3133 | 3136 | 3139 | 3146 | 3149 | 3156 | 3170 |
| 3191 | 3195 | 3714 | -994 |      |      |      |      |

TS2C\_v2

Figure S39. The optimized structure of TS2C\_v2 transition state.

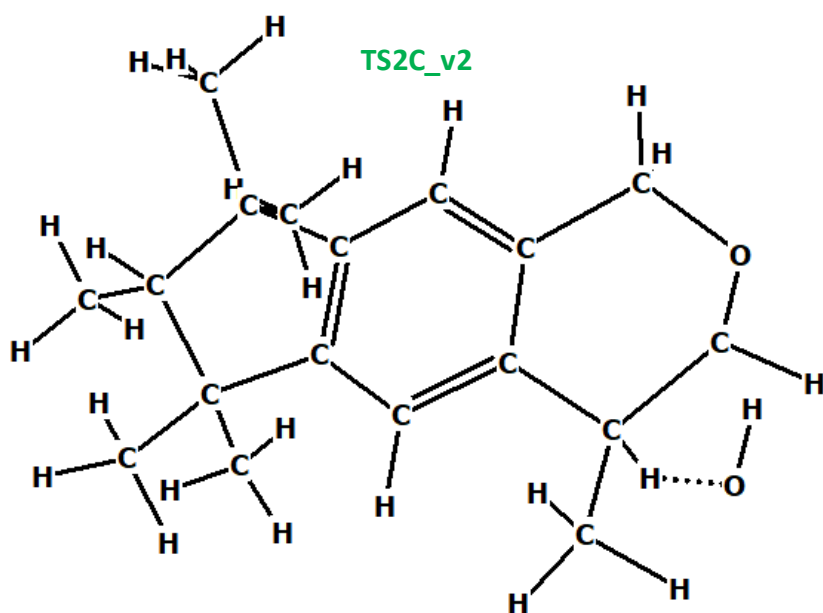

Table S71. Geometry (Å) of TS2C\_v2 transition state.

| Atom | x        | y        | z        |
|------|----------|----------|----------|
| O    | 3.662297 | -1.80594 | -0.31299 |
| C    | -3.16218 | 0.442928 | -0.1226  |
| C    | -2.0287  | 1.51227  | -0.01928 |
| C    | -2.5563  | -0.92887 | 0.311753 |
| C    | -0.78486 | 0.649261 | -0.13435 |
| C    | -1.07934 | -0.70682 | 0.045443 |
| C    | -4.47309 | 0.817272 | 0.554519 |
| C    | -2.01329 | 2.274557 | 1.31475  |
| C    | -2.13419 | 2.526229 | -1.16171 |
| C    | -2.77125 | -1.26126 | 1.796781 |
| C    | -3.1305  | -2.06953 | -0.53283 |
| C    | 0.522185 | 1.059246 | -0.36228 |
| C    | -0.06237 | -1.6531  | -0.00407 |
| C    | 1.558543 | 0.112299 | -0.42263 |
| C    | 1.257267 | -1.24765 | -0.23483 |
| C    | 2.328333 | -2.30816 | -0.3163  |
| C    | 3.839443 | -0.66211 | -1.04079 |
| C    | 3.225717 | 1.704888 | -1.56278 |
| H    | -3.36258 | 0.339376 | -1.20353 |
| H    | -4.35705 | 0.935269 | 1.641478 |
| H    | -4.86234 | 1.764904 | 0.151957 |
| H    | -5.23713 | 0.044318 | 0.379832 |
| H    | -1.13429 | 2.936465 | 1.35307  |
| H    | -2.91246 | 2.900812 | 1.418393 |
| H    | -1.96152 | 1.59758  | 2.179325 |

|   |          |          |          |
|---|----------|----------|----------|
| H | -1.33435 | 3.280341 | -1.09923 |
| H | -2.06269 | 2.026577 | -2.13935 |
| H | -3.0981  | 3.057244 | -1.1133  |
| H | -2.40596 | -0.46297 | 2.458235 |
| H | -3.83855 | -1.42605 | 2.009491 |
| H | -2.22888 | -2.18441 | 2.053228 |
| H | -4.222   | -2.13114 | -0.39917 |
| H | -2.92077 | -1.91367 | -1.60149 |
| H | -2.70285 | -3.0392  | -0.23414 |
| H | 0.746244 | 2.119334 | -0.49856 |
| H | -0.28193 | -2.71572 | 0.136172 |
| H | 2.258626 | -2.98806 | 0.542545 |
| H | 2.18655  | -2.90497 | -1.23378 |
| H | 4.894703 | -0.48559 | -1.26357 |
| H | 2.847908 | 1.478889 | -2.57287 |
| H | 2.732981 | 2.615526 | -1.20046 |
| H | 4.303031 | 1.91067  | -1.6357  |
| O | 4.280797 | 0.50253  | 1.525056 |
| H | 4.205682 | -0.46784 | 1.414398 |
| C | 2.985299 | 0.516144 | -0.64846 |
| H | 3.401973 | 0.817136 | 0.414749 |

Table S72. Frequencies (cm<sup>-1</sup>) of TS2C\_v2 transition state.

|      |      |      |      |      |      |      |      |
|------|------|------|------|------|------|------|------|
| 32   | 40   | 71   | 82   | 108  | 136  | 146  | 167  |
| 184  | 212  | 223  | 234  | 238  | 247  | 258  | 267  |
| 273  | 275  | 288  | 296  | 324  | 330  | 339  | 355  |
| 378  | 384  | 393  | 414  | 448  | 476  | 488  | 523  |
| 548  | 558  | 580  | 586  | 650  | 674  | 679  | 723  |
| 777  | 788  | 805  | 823  | 838  | 868. | 912  | 920  |
| 926  | 939  | 943  | 945  | 954  | 984  | 992  | 1005 |
| 1016 | 1028 | 1033 | 1047 | 1090 | 1100 | 1106 | 1156 |
| 1161 | 1164 | 1197 | 1207 | 1216 | 1218 | 1243 | 1258 |
| 1263 | 1279 | 1292 | 1301 | 1330 | 1351 | 1351 | 1361 |
| 1372 | 1374 | 1378 | 1386 | 1388 | 1393 | 1397 | 1417 |
| 1437 | 1441 | 1442 | 1445 | 1453 | 1455 | 1460 | 1460 |
| 1461 | 1466 | 1467 | 1474 | 1476 | 1492 | 1544 | 1657 |
| 1696 | 1746 | 3035 | 3038 | 3039 | 3049 | 3050 | 3050 |
| 3053 | 3062 | 3118 | 3119 | 3126 | 3128 | 3130 | 3130 |
| 3130 | 3133 | 3136 | 3139 | 3146 | 3149 | 3156 | 3170 |
| 3191 | 3195 | 3714 | -994 |      |      |      |      |

### ProductC

Figure S40. The optimized structure of ProductC.

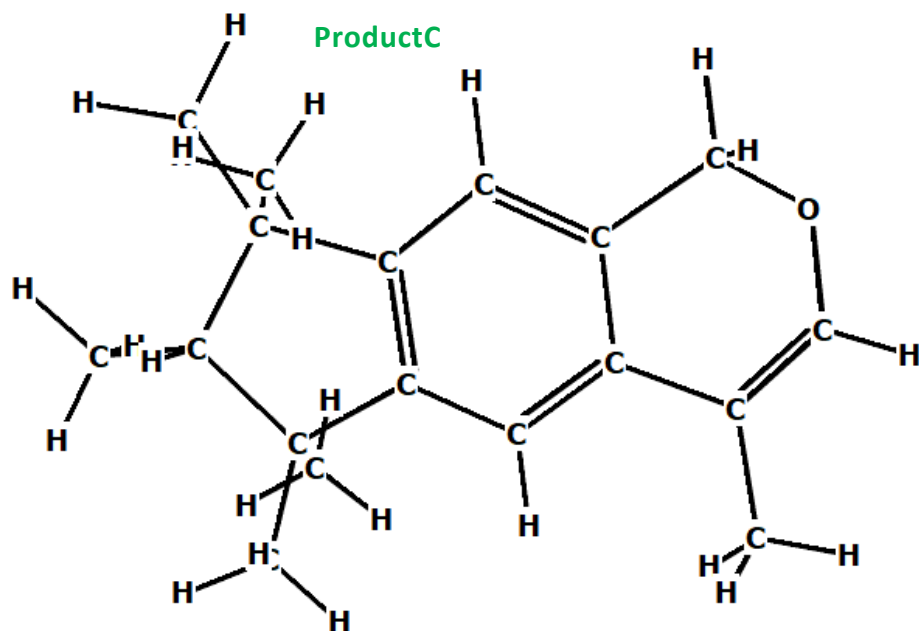

Table S73. Geometry (Å) of ProductC.

| Atom | x        | y        | z        |
|------|----------|----------|----------|
| O    | 4.064634 | -0.96924 | 0.600213 |
| C    | -2.90048 | 0.024774 | -0.44561 |
| C    | -1.99562 | 1.26092  | -0.1458  |
| C    | -2.12241 | -1.24891 | 0.011986 |
| C    | -0.61461 | 0.629738 | -0.12675 |
| C    | -0.68599 | -0.76112 | -0.03903 |
| C    | -4.33316 | 0.127728 | 0.058491 |
| C    | -2.28408 | 1.927747 | 1.207854 |
| C    | -2.13269 | 2.314057 | -1.24884 |
| C    | -2.46725 | -1.71009 | 1.436738 |
| C    | -2.37231 | -2.41242 | -0.95178 |
| C    | 0.619048 | 1.279357 | -0.15834 |
| C    | 0.484597 | -1.52202 | 0.009405 |
| C    | 1.799058 | 0.525304 | -0.11359 |
| C    | 1.718632 | -0.87991 | -0.04205 |
| C    | 3.140486 | 1.133581 | -0.07604 |
| C    | 3.022372 | -1.62811 | -0.11823 |
| C    | 4.166862 | 0.35888  | 0.321208 |
| C    | 3.322672 | 2.600201 | -0.3393  |
| H    | -2.9388  | -0.0424  | -1.54716 |
| H    | -4.38204 | 0.189585 | 1.155273 |
| H    | -4.82752 | 1.021488 | -0.3521  |
| H    | -4.92099 | -0.74892 | -0.25418 |
| H    | -1.54603 | 2.723406 | 1.393819 |
| H    | -3.2846  | 2.386707 | 1.213643 |
| H    | -2.22593 | 1.214086 | 2.042063 |

|   |          |          |          |
|---|----------|----------|----------|
| H | -1.49602 | 3.188909 | -1.04451 |
| H | -1.84667 | 1.899375 | -2.22704 |
| H | -3.17411 | 2.667296 | -1.3134  |
| H | -2.33886 | -0.90617 | 2.175282 |
| H | -3.50657 | -2.06861 | 1.492135 |
| H | -1.80734 | -2.54192 | 1.728151 |
| H | -3.44397 | -2.66605 | -0.97532 |
| H | -2.0551  | -2.15328 | -1.97291 |
| H | -1.8233  | -3.31366 | -0.63748 |
| H | 0.668289 | 2.36927  | -0.21531 |
| H | 0.442028 | -2.61326 | 0.069804 |
| H | 2.941924 | -2.63488 | 0.307797 |
| H | 3.339374 | -1.71467 | -1.17548 |
| H | 5.171063 | 0.745913 | 0.508362 |
| H | 2.950223 | 2.874988 | -1.33813 |
| H | 2.766275 | 3.207841 | 0.391635 |
| H | 4.382542 | 2.879857 | -0.27769 |

Table S74. Frequencies (cm<sup>-1</sup>) of ProductC.

|      |      |      |      |      |      |      |      |
|------|------|------|------|------|------|------|------|
| 52   | 62   | 101  | 135  | 145  | 164  | 215  | 221  |
| 230  | 233  | 249  | 254  | 259  | 267  | 276  | 282  |
| 306  | 325  | 331  | 344  | 349  | 373  | 390  | 398  |
| 432  | 474  | 504  | 520  | 544  | 561  | 576  | 599  |
| 654  | 681  | 712  | 730  | 782  | 808  | 825  | 846  |
| 898  | 917  | 921  | 935  | 942  | 944. | 955  | 986  |
| 991  | 994  | 1003 | 1022 | 1027 | 1041 | 1054 | 1090 |
| 1102 | 1109 | 1153 | 1161 | 1194 | 1209 | 1217 | 1236 |
| 1244 | 1252 | 1278 | 1289 | 1305 | 1332 | 1350 | 1351 |
| 1358 | 1370 | 1373 | 1377 | 1385 | 1390 | 1396 | 1401 |
| 1421 | 1438 | 1441 | 1442 | 1446 | 1452 | 1454 | 1455 |
| 1460 | 1461 | 1467 | 1468 | 1476 | 1479 | 1493 | 1546 |
| 1656 | 1702 | 1740 | 3022 | 3033 | 3035 | 3036 | 3048 |
| 3051 | 3052 | 3058 | 3115 | 3116 | 3121 | 3124 | 3125 |
| 3126 | 3128 | 3133 | 3138 | 3140 | 3148 | 3149 | 3153 |
| 3179 | 3193 | 3218 |      |      |      |      |      |

### TS2D

Figure S41. The optimized structure of TS2D transition state.

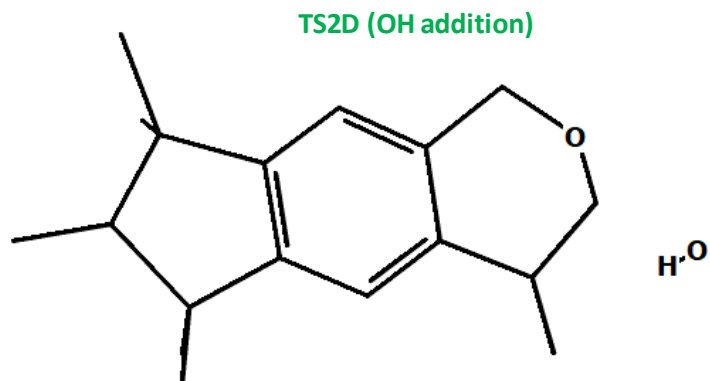

Table S75. Geometry (Å) of TS2D transition state.

| Atom | x        | y        | z        |
|------|----------|----------|----------|
| O    | 3.334732 | -0.69239 | -1.42067 |
| C    | -2.9609  | 0.081939 | -0.60364 |
| C    | -2.06602 | 1.2761   | -0.1423  |
| C    | -2.32147 | -1.22896 | -0.04535 |
| C    | -0.7461  | 0.602035 | 0.095184 |
| C    | -0.86113 | -0.83236 | 0.089083 |
| C    | -4.45024 | 0.24598  | -0.33286 |
| C    | -2.55455 | 1.969846 | 1.144954 |
| C    | -1.96762 | 2.338361 | -1.24818 |
| C    | -2.86711 | -1.63585 | 1.33275  |
| C    | -2.51921 | -2.39319 | -1.01794 |
| C    | 0.522156 | 1.254364 | 0.455487 |
| C    | 1.641023 | 0.49762  | 0.609922 |
| C    | 1.562634 | -0.9429  | 0.280214 |
| C    | 3.143492 | 2.526411 | 0.968991 |
| H    | -2.82598 | 0.025558 | -1.698   |
| H    | -4.66986 | 0.322524 | 0.741787 |
| H    | -4.83581 | 1.154667 | -0.81968 |
| H    | -5.01559 | -0.60991 | -0.73199 |
| H    | -1.81895 | 2.723835 | 1.465042 |
| H    | -3.50872 | 2.488798 | 0.966341 |
| H    | -2.695   | 1.261584 | 1.972995 |
| H    | -1.32782 | 3.177805 | -0.93486 |
| H    | -1.54758 | 1.907468 | -2.16927 |
| H    | -2.96616 | 2.743613 | -1.47739 |
| H    | -2.74708 | -0.83575 | 2.077059 |
| H    | -3.9349  | -1.89466 | 1.269759 |
| H    | -2.32192 | -2.51897 | 1.698446 |
| H    | -3.59225 | -2.59667 | -1.16054 |
| H    | -2.07431 | -2.16681 | -1.99828 |
| H    | -2.05316 | -3.31234 | -0.63085 |
| H    | 0.544003 | 2.332732 | 0.625996 |



|   |          |          |          |
|---|----------|----------|----------|
| H | 2.791482 | 3.015508 | 0.044731 |
| H | 2.548291 | 2.937161 | 1.802875 |
| H | 4.19667  | 2.784558 | 1.12335  |
| C | 2.980975 | 1.040859 | 0.861322 |
| H | 3.580047 | 0.441242 | 1.553037 |
| C | 3.396994 | 0.601823 | -1.16517 |
| H | 3.94708  | 1.166275 | -1.92826 |
| O | 5.168909 | 0.799509 | -0.14831 |
| H | 5.260763 | -0.09204 | 0.238407 |
| C | 2.752396 | -1.5367  | -0.39384 |
| H | 2.508434 | -2.48077 | -0.89444 |
| H | 3.563711 | -1.73166 | 0.331795 |
| C | 0.230314 | -1.61767 | 0.256124 |
| H | 0.167923 | -2.70537 | 0.334852 |

Table S76. Frequencies (cm<sup>-1</sup>) of TS2D transition state.

|      |      |      |       |      |      |      |      |
|------|------|------|-------|------|------|------|------|
| 32   | 43   | 61   | 69    | 104  | 128  | 137  | 189  |
| 198  | 202  | 211  | 218   | 226  | 230  | 247  | 254  |
| 259  | 266  | 271  | 283   | 296  | 298  | 309  | 316  |
| 328  | 330  | 351  | 375   | 396  | 429  | 458  | 469  |
| 493  | 532  | 549  | 562   | 586  | 628  | 640  | 664  |
| 674  | 695  | 752  | 768   | 806  | 817. | 826  | 848  |
| 882  | 910  | 929  | 938   | 943  | 944  | 947  | 976  |
| 988  | 999  | 1019 | 1021  | 1042 | 1054 | 1089 | 1092 |
| 1120 | 1140 | 1147 | 1156  | 1173 | 1193 | 1208 | 1214 |
| 1217 | 1242 | 1251 | 1264  | 1284 | 1310 | 1333 | 1347 |
| 1350 | 1358 | 1367 | 1370  | 1374 | 1386 | 1389 | 1399 |
| 1413 | 1422 | 1437 | 1441  | 1443 | 1444 | 1447 | 1450 |
| 1455 | 1457 | 1459 | 1462  | 1466 | 1473 | 1473 | 1638 |
| 1683 | 3024 | 3027 | 3036  | 3040 | 3046 | 3050 | 3056 |
| 3060 | 3087 | 3123 | 3126  | 3130 | 3130 | 3131 | 3132 |
| 3135 | 3143 | 3147 | 3151  | 3157 | 3163 | 3167 | 3176 |
| 3187 | 3197 | 3747 | -1152 |      |      |      |      |

## P2D

Figure S42. The optimized structure of P2D.

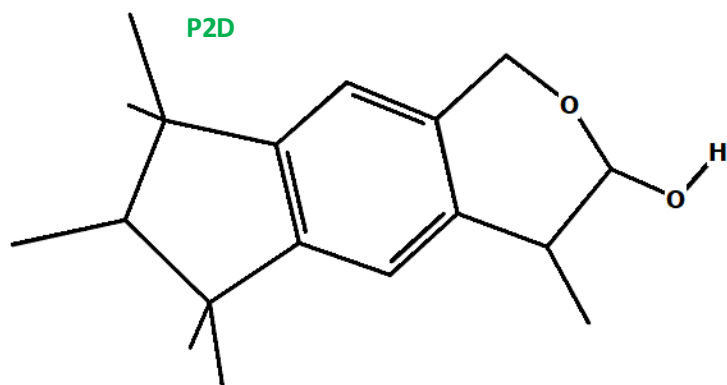

Table S77. Geometry (Å) of P2D.

| Atom | x        | y        | z        |
|------|----------|----------|----------|
| O    | 3.742947 | -1.36955 | 0.634087 |
| C    | -3.12674 | 0.213094 | -0.48093 |
| C    | -2.15901 | 1.332468 | 0.017755 |
| C    | -2.47081 | -1.16223 | -0.13942 |
| C    | -0.82965 | 0.599011 | 0.036683 |
| C    | -1.00335 | -0.78441 | -0.0493  |
| C    | -4.57798 | 0.366508 | -0.04802 |
| C    | -2.48625 | 1.854321 | 1.425172 |
| C    | -2.15267 | 2.516277 | -0.9536  |
| C    | -2.93836 | -1.75906 | 1.197204 |
| C    | -2.73748 | -2.18191 | -1.25023 |
| C    | 0.44651  | 1.141844 | 0.147008 |
| C    | 0.103579 | -1.62516 | -0.01185 |
| C    | 1.573413 | 0.307014 | 0.178631 |
| C    | 1.389141 | -1.08396 | 0.10567  |
| C    | 2.975286 | 0.889526 | 0.296448 |
| C    | 4.000415 | -0.17252 | -0.0723  |
| C    | 3.186998 | 2.148815 | -0.5424  |
| H    | -3.09792 | 0.278908 | -1.58281 |
| H    | -4.6902  | 0.307383 | 1.044252 |
| H    | -4.98249 | 1.336126 | -0.37663 |
| H    | -5.20429 | -0.42157 | -0.49346 |
| H    | -1.71028 | 2.566383 | 1.746141 |
| H    | -3.45282 | 2.381044 | 1.434156 |
| H    | -2.52622 | 1.045006 | 2.168058 |
| H    | -1.46878 | 3.307752 | -0.60983 |
| H    | -1.8372  | 2.199391 | -1.95892 |
| H    | -3.16011 | 2.955518 | -1.02888 |
| H    | -2.79525 | -1.06194 | 2.035104 |
| H    | -4.00336 | -2.03393 | 1.153645 |
| H    | -2.3629  | -2.67151 | 1.417973 |
| H    | -3.82033 | -2.34825 | -1.3652  |
| H    | -2.33717 | -1.82951 | -2.21249 |

|   |          |          |          |
|---|----------|----------|----------|
| H | -2.2736  | -3.1531  | -1.0177  |
| H | 0.572055 | 2.225308 | 0.210938 |
| H | -0.01819 | -2.71135 | -0.06861 |
| H | 3.17135  | 1.124955 | 1.357328 |
| H | 3.948455 | -0.39026 | -1.16177 |
| H | 2.940947 | 1.95569  | -1.59832 |
| H | 2.564065 | 2.982323 | -0.19343 |
| H | 4.237906 | 2.46086  | -0.47942 |
| O | 5.258398 | 0.28353  | 0.29769  |
| H | 5.907091 | -0.36477 | -0.01263 |
| C | 2.58655  | -2.0077  | 0.134214 |
| H | 2.780295 | -2.40075 | -0.88347 |
| H | 2.391321 | -2.86683 | 0.789728 |

Table S78. Frequencies (cm<sup>-1</sup>) of P2D.

|      |      |      |      |      |      |      |      |
|------|------|------|------|------|------|------|------|
| 43   | 52   | 83   | 113  | 138  | 141  | 194  | 223  |
| 227  | 239  | 243  | 254  | 262  | 264  | 273  | 279  |
| 290  | 299  | 306  | 327  | 332  | 339  | 349  | 356  |
| 371  | 398  | 438  | 454  | 477  | 510  | 536  | 549  |
| 557  | 571  | 614  | 633  | 681  | 724  | 744  | 776  |
| 788  | 827  | 834  | 895  | 912  | 920. | 933  | 944  |
| 946  | 954  | 990  | 992  | 1004 | 1010 | 1027 | 1045 |
| 1064 | 1091 | 1105 | 1114 | 1137 | 1154 | 1161 | 1162 |
| 1186 | 1201 | 1212 | 1216 | 1224 | 1244 | 1250 | 1268 |
| 1282 | 1296 | 1314 | 1318 | 1333 | 1351 | 1351 | 1372 |
| 1374 | 1377 | 1381 | 1385 | 1386 | 1390 | 1396 | 1406 |
| 1439 | 1444 | 1448 | 1448 | 1454 | 1456 | 1458 | 1461 |
| 1462 | 1468 | 1469 | 1473 | 1477 | 1479 | 1497 | 1544 |
| 1662 | 1706 | 2984 | 3014 | 3036 | 3040 | 3046 | 3047 |
| 3052 | 3054 | 3056 | 3059 | 3120 | 3123 | 3123 | 3126 |
| 3129 | 3129 | 3133 | 3137 | 3141 | 3144 | 3148 | 3151 |
| 3160 | 3180 | 3199 | 3841 |      |      |      |      |

### TS3D\_v1

Figure S43. The optimized structure of TS3d\_v1 transition state.

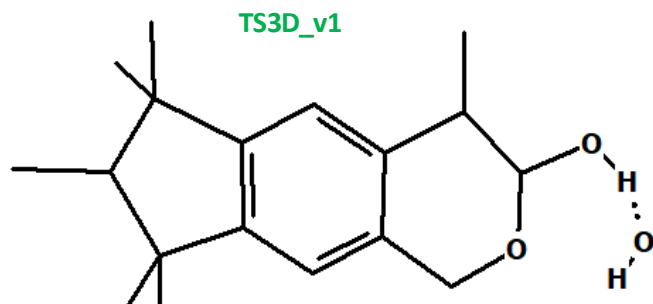

Table S79. Geometry (Å) of TS3d\_v1 transition state.

| Atom | x        | y        | z        |
|------|----------|----------|----------|
| O    | 3.650308 | -2.11258 | -0.25243 |
| C    | -2.99996 | 0.473446 | -0.17017 |
| C    | -1.80367 | 1.44656  | 0.074804 |
| C    | -2.49672 | -0.97476 | 0.124578 |
| C    | -0.61496 | 0.51958  | -0.10621 |
| C    | -1.00041 | -0.82309 | -0.07946 |
| C    | -4.30366 | 0.860119 | 0.513805 |
| C    | -1.77747 | 2.056596 | 1.484658 |
| C    | -1.81086 | 2.583567 | -0.95089 |
| C    | -2.78039 | -1.45277 | 1.557403 |
| C    | -3.11568 | -1.97496 | -0.85606 |
| C    | 0.724091 | 0.86337  | -0.25922 |
| C    | -0.04126 | -1.82235 | -0.19796 |
| C    | 1.702327 | -0.13426 | -0.38602 |
| C    | 1.307618 | -1.48125 | -0.34918 |
| C    | 3.403227 | 1.435612 | -1.46777 |
| H    | -3.17338 | 0.500685 | -1.26034 |
| H    | -4.20991 | 0.856934 | 1.60931  |
| H    | -4.62278 | 1.867544 | 0.205607 |
| H    | -5.10851 | 0.159993 | 0.242345 |
| H    | -0.85681 | 2.645951 | 1.616316 |
| H    | -2.63464 | 2.730143 | 1.637816 |
| H    | -1.79774 | 1.286461 | 2.2688   |
| H    | -0.96811 | 3.272796 | -0.78633 |
| H    | -1.74057 | 2.189721 | -1.97583 |
| H    | -2.74052 | 3.168382 | -0.86681 |
| H    | -2.38072 | -0.76132 | 2.312831 |
| H    | -3.86239 | -1.56298 | 1.72723  |
| H    | -2.31125 | -2.4353  | 1.720786 |
| H    | -4.21303 | -1.97555 | -0.75961 |
| H    | -2.85891 | -1.7184  | -1.89458 |
| H    | -2.76223 | -2.99816 | -0.65512 |
| H    | 1.015661 | 1.91575  | -0.2778  |
| H    | -0.32783 | -2.87797 | -0.17038 |
| H    | 2.951964 | 1.256645 | -2.45566 |

|   |          |          |          |
|---|----------|----------|----------|
| H | 2.967742 | 2.353566 | -1.05334 |
| H | 4.480458 | 1.602266 | -1.59851 |
| C | 3.170319 | 0.239839 | -0.54596 |
| H | 3.588402 | 0.459649 | 0.451081 |
| C | 3.943726 | -0.9815  | -1.05112 |
| H | 3.661109 | -1.20328 | -2.10177 |
| C | 2.335886 | -2.57914 | -0.49805 |
| H | 2.277712 | -3.01764 | -1.51269 |
| H | 2.150137 | -3.38273 | 0.225964 |
| O | 5.288146 | -0.71412 | -0.92851 |
| H | 5.850742 | -1.54869 | -1.37258 |
| O | 5.996105 | -2.7329  | -1.68787 |
| H | 5.374562 | -3.16257 | -1.06319 |

Table S80. Frequencies (cm<sup>-1</sup>) of TS3d\_v1 transition state.

|      |       |      |      |      |      |      |      |
|------|-------|------|------|------|------|------|------|
| 31   | 48    | 76   | 89   | 106  | 116  | 137  | 151  |
| 198  | 221   | 230  | 232  | 241  | 253  | 260  | 261  |
| 274  | 280   | 286  | 289  | 300  | 330  | 333  | 346  |
| 352  | 368   | 377  | 397  | 404  | 442  | 455  | 472  |
| 508  | 534   | 548  | 557  | 569  | 609  | 633  | 680  |
| 722  | 739   | 749  | 779  | 794  | 828. | 833  | 884  |
| 905  | 913   | 921  | 933  | 944  | 945  | 953  | 990  |
| 990  | 1002  | 1009 | 1026 | 1050 | 1072 | 1091 | 1104 |
| 1114 | 1142  | 1156 | 1160 | 1165 | 1173 | 1199 | 1212 |
| 1216 | 1228  | 1244 | 1257 | 1268 | 1284 | 1295 | 1316 |
| 1323 | 1350  | 1351 | 1362 | 1371 | 1373 | 1376 | 1379 |
| 1384 | 1390  | 1390 | 1395 | 1399 | 1439 | 1444 | 1447 |
| 1452 | 1455  | 1458 | 1459 | 1462 | 1463 | 1467 | 1472 |
| 1476 | 1477  | 1490 | 1545 | 1587 | 1662 | 1706 | 3004 |
| 3026 | 3037  | 3039 | 3043 | 3045 | 3053 | 3055 | 3062 |
| 3068 | 3118  | 3120 | 3125 | 3126 | 3128 | 3130 | 3135 |
| 3141 | 3142  | 3148 | 3149 | 3154 | 3164 | 3176 | 3202 |
| 3680 | -1649 |      |      |      |      |      |      |

### TS3D\_v2

Figure S44. The optimized structure of TS3D\_v2 transition state.

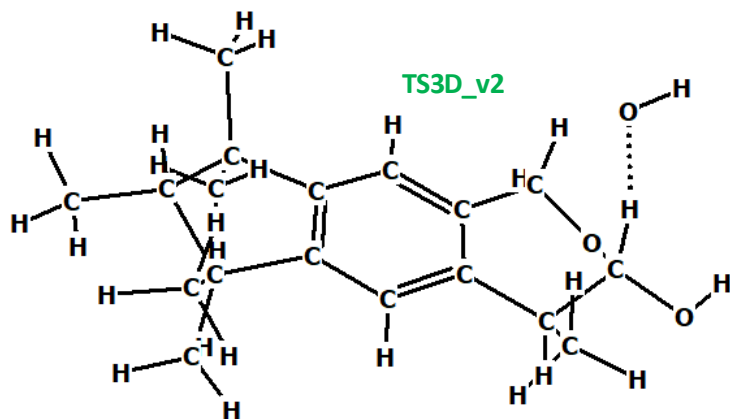

Table S81. Geometry (Å) of TS3D\_v2 transition state.

| Atom | x        | y        | z        |
|------|----------|----------|----------|
| O    | 3.803582 | -1.88846 | 0.550889 |
| C    | -2.92071 | 0.266276 | -0.50913 |
| C    | -1.82475 | 1.331705 | -0.19096 |
| C    | -2.38928 | -1.11708 | -0.01581 |
| C    | -0.57546 | 0.47163  | -0.12173 |
| C    | -0.88907 | -0.88622 | -0.02555 |
| C    | -4.32719 | 0.62376  | -0.04913 |
| C    | -2.03335 | 2.058099 | 1.147009 |
| C    | -1.74522 | 2.377376 | -1.30666 |
| C    | -2.85228 | -1.48939 | 1.401197 |
| C    | -2.80836 | -2.23353 | -0.97652 |
| C    | 0.751942 | 0.887634 | -0.12482 |
| C    | 0.129658 | -1.82704 | 0.076346 |
| C    | 1.789889 | -0.05078 | -0.03358 |
| C    | 1.466856 | -1.41313 | 0.074291 |
| C    | 3.549431 | 1.475417 | -1.0771  |
| H    | -2.93797 | 0.191765 | -1.61074 |
| H    | -4.39133 | 0.715117 | 1.044713 |
| H    | -4.64884 | 1.581404 | -0.48619 |
| H    | -5.04917 | -0.14434 | -0.36621 |
| H    | -1.17124 | 2.711627 | 1.351793 |
| H    | -2.93499 | 2.688796 | 1.114665 |
| H    | -2.13105 | 1.358163 | 1.988956 |
| H    | -0.97316 | 3.131801 | -1.08983 |
| H    | -1.50668 | 1.906135 | -2.27176 |
| H    | -2.70705 | 2.904973 | -1.40615 |
| H    | -2.60401 | -0.71135 | 2.13693  |
| H    | -3.9401  | -1.65567 | 1.427123 |
| H    | -2.35997 | -2.42145 | 1.718833 |
| H    | -3.9066  | -2.29572 | -1.03476 |
| H    | -2.41743 | -2.04932 | -1.98841 |
| H    | -2.43649 | -3.21173 | -0.63399 |

|   |          |          |          |
|---|----------|----------|----------|
| H | 0.988112 | 1.951804 | -0.19821 |
| H | -0.10161 | -2.89334 | 0.159542 |
| H | 3.291498 | 1.109948 | -2.08285 |
| H | 2.989248 | 2.39931  | -0.88579 |
| H | 4.620534 | 1.717022 | -1.05587 |
| C | 3.243216 | 0.399289 | -0.03629 |
| H | 3.498581 | 0.7789   | 0.969427 |
| C | 4.151451 | -0.80215 | -0.2569  |
| H | 4.014114 | -1.1179  | -1.35656 |
| C | 2.56295  | -2.44967 | 0.154953 |
| H | 2.682754 | -2.9342  | -0.83097 |
| H | 2.318334 | -3.21872 | 0.898415 |
| O | 3.482226 | -1.59492 | -2.79002 |
| H | 4.196169 | -2.25914 | -2.88586 |
| O | 5.457732 | -0.44839 | 0.005476 |
| H | 6.003291 | -1.24208 | -0.10513 |

Table S82. Frequencies (cm<sup>-1</sup>) of TS3D\_v2 transition state.

|      |      |      |      |      |      |      |      |
|------|------|------|------|------|------|------|------|
| 31   | 42   | 59   | 72   | 103  | 117  | 137  | 144  |
| 180  | 220  | 222  | 232  | 240  | 250  | 256  | 259  |
| 266  | 274  | 278  | 285  | 297  | 302  | 316  | 328  |
| 336  | 345  | 356  | 372  | 398  | 439  | 454  | 474  |
| 510  | 536  | 550  | 559  | 570  | 609  | 631  | 652  |
| 684  | 722  | 744  | 776  | 789  | 826. | 834  | 901  |
| 911  | 919  | 936  | 944  | 946  | 954  | 989  | 990  |
| 1004 | 1013 | 1027 | 1033 | 1056 | 1092 | 1103 | 1113 |
| 1119 | 1135 | 1155 | 1162 | 1184 | 1192 | 1206 | 1213 |
| 1217 | 1240 | 1246 | 1266 | 1283 | 1295 | 1300 | 1311 |
| 1326 | 1339 | 1349 | 1351 | 1373 | 1374 | 1379 | 1380 |
| 1383 | 1385 | 1389 | 1395 | 1411 | 1440 | 1444 | 1446 |
| 1450 | 1452 | 1455 | 1458 | 1458 | 1462 | 1465 | 1468 |
| 1475 | 1476 | 1494 | 1546 | 1665 | 1706 | 1874 | 3036 |
| 3042 | 3043 | 3045 | 3048 | 3050 | 3053 | 3056 | 3058 |
| 3120 | 3121 | 3128 | 3131 | 3133 | 3136 | 3140 | 3140 |
| 3142 | 3144 | 3145 | 3152 | 3157 | 3170 | 3192 | 3713 |
| 3821 | -446 |      |      |      |      |      |      |

### P3D\_v1

Figure S45. The optimized structure of P3D\_v1.

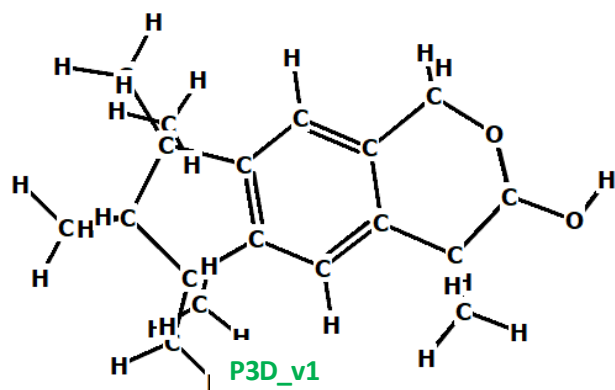

Table S83. Geometry (Å) of P3D\_v1.

| Atom | x        | y        | z        |
|------|----------|----------|----------|
| O    | 3.40383  | -2.31992 | 0.047958 |
| C    | -3.14726 | 0.492369 | -0.15749 |
| C    | -1.92788 | 1.420986 | 0.141541 |
| C    | -2.70677 | -0.97482 | 0.144905 |
| C    | -0.76675 | 0.45346  | -0.00338 |
| C    | -1.19923 | -0.87511 | -0.00137 |
| C    | -4.4624  | 0.920416 | 0.47817  |
| C    | -1.93414 | 2.018688 | 1.556784 |
| C    | -1.85623 | 2.565578 | -0.87326 |
| C    | -3.06123 | -1.45071 | 1.562402 |
| C    | -3.32178 | -1.9466  | -0.86603 |
| C    | 0.587611 | 0.75189  | -0.10616 |
| C    | -0.27104 | -1.90616 | -0.08893 |
| C    | 1.533575 | -0.27967 | -0.20748 |
| C    | 1.093971 | -1.6116  | -0.18754 |
| C    | 3.305659 | 1.187868 | -1.31161 |
| H    | -3.27689 | 0.532907 | -1.25328 |
| H    | -4.41388 | 0.903037 | 1.576555 |
| H    | -4.7305  | 1.942211 | 0.168683 |
| H    | -5.28186 | 0.254518 | 0.167136 |
| H    | -1.00239 | 2.580124 | 1.726351 |
| H    | -2.77655 | 2.715554 | 1.684716 |
| H    | -2.00466 | 1.244071 | 2.333554 |
| H    | -0.99569 | 3.221958 | -0.67105 |
| H    | -1.76221 | 2.177869 | -1.89861 |
| H    | -2.7668  | 3.183048 | -0.81832 |
| H    | -2.66635 | -0.77734 | 2.336432 |
| H    | -4.15204 | -1.52348 | 1.690549 |
| H    | -2.63328 | -2.45014 | 1.736698 |
| H    | -4.42131 | -1.91052 | -0.81081 |
| H    | -3.01798 | -1.69195 | -1.89227 |
| H    | -3.01133 | -2.98283 | -0.66052 |
| H    | 0.916468 | 1.793712 | -0.10619 |



|   |          |          |          |
|---|----------|----------|----------|
| H | -0.59399 | -2.95158 | -0.07519 |
| H | 2.864098 | 0.966705 | -2.29516 |
| H | 2.895144 | 2.142216 | -0.95829 |
| H | 4.3899   | 1.308772 | -1.43097 |
| C | 3.012968 | 0.060345 | -0.32635 |
| H | 3.395023 | 0.331392 | 0.671693 |
| C | 3.805122 | -1.22291 | -0.73373 |
| H | 3.578316 | -1.41766 | -1.8136  |
| C | 2.095627 | -2.73857 | -0.28667 |
| H | 2.085567 | -3.16638 | -1.30806 |
| H | 1.835376 | -3.54447 | 0.411617 |
| O | 5.106782 | -0.98753 | -0.61666 |

Table S84. Frequencies ( $\text{cm}^{-1}$ ) of P3D\_v1.

|      |      |      |      |      |      |      |      |
|------|------|------|------|------|------|------|------|
| 38   | 50   | 79   | 111  | 138  | 139  | 193  | 225  |
| 227  | 237  | 243  | 251  | 262  | 263  | 273  | 279  |
| 289  | 306  | 325  | 331  | 332  | 345  | 349  | 373  |
| 397  | 432  | 444  | 466  | 503  | 528  | 550  | 555  |
| 567  | 599  | 636  | 678  | 719  | 724  | 767  | 783  |
| 816  | 833  | 851  | 910  | 917  | 933. | 945  | 946  |
| 954  | 956  | 986  | 993  | 1004 | 1008 | 1027 | 1060 |
| 1074 | 1091 | 1103 | 1108 | 1139 | 1154 | 1155 | 1161 |
| 1168 | 1201 | 1212 | 1217 | 1229 | 1246 | 1253 | 1268 |
| 1284 | 1296 | 1310 | 1327 | 1346 | 1351 | 1352 | 1372 |
| 1375 | 1380 | 1383 | 1390 | 1390 | 1391 | 1397 | 1439 |
| 1444 | 1448 | 1452 | 1456 | 1458 | 1461 | 1462 | 1464 |
| 1468 | 1469 | 1477 | 1478 | 1489 | 1543 | 1663 | 1704 |
| 2883 | 3024 | 3036 | 3041 | 3046 | 3048 | 3053 | 3055 |
| 3073 | 3076 | 3120 | 3123 | 3124 | 3127 | 3130 | 3131 |
| 3138 | 3140 | 3144 | 3149 | 3151 | 3157 | 3169 | 3183 |
| 3200 |      |      |      |      |      |      |      |

### P3D\_v2

Figure S46. The optimized structure of P3D\_v2.

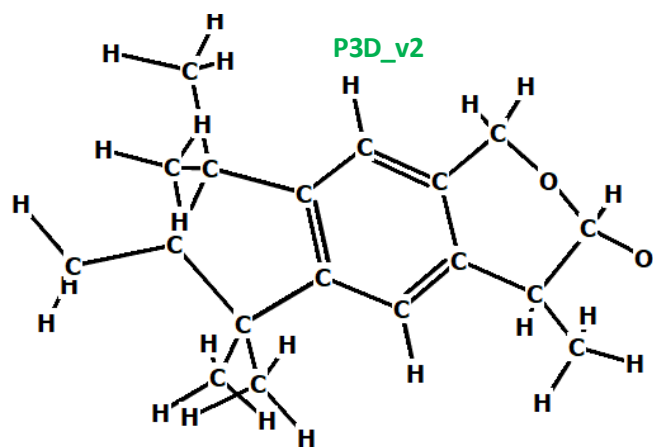

Table S85. Geometry (Å) of P3D\_v2.

| Atom | x        | y        | z        |
|------|----------|----------|----------|
| O    | 3.761692 | -1.34465 | 0.564671 |
| C    | -3.11515 | 0.216485 | -0.44287 |
| C    | -2.15158 | 1.322545 | 0.092021 |
| C    | -2.43035 | -1.1641  | -0.19458 |
| C    | -0.81112 | 0.611884 | 0.033052 |
| C    | -0.96617 | -0.76805 | -0.12592 |
| C    | -4.55688 | 0.323392 | 0.033439 |
| C    | -2.44678 | 1.760031 | 1.534883 |
| C    | -2.18999 | 2.558477 | -0.81139 |
| C    | -2.84979 | -1.8385  | 1.120954 |
| C    | -2.71404 | -2.12771 | -1.35028 |
| C    | 0.459197 | 1.167268 | 0.143148 |
| C    | 0.152397 | -1.59348 | -0.15942 |
| C    | 1.595855 | 0.348127 | 0.090731 |
| C    | 1.432843 | -1.03747 | -0.05156 |
| C    | 3.218121 | 2.066521 | -0.84076 |
| H    | -3.11589 | 0.342955 | -1.53983 |
| H    | -4.64105 | 0.207621 | 1.123733 |
| H    | -4.98446 | 1.301737 | -0.23466 |
| H    | -5.18221 | -0.45117 | -0.43635 |
| H    | -1.67371 | 2.467168 | 1.873271 |
| H    | -3.42105 | 2.268297 | 1.599383 |
| H    | -2.45242 | 0.910769 | 2.232818 |
| H    | -1.50626 | 3.339463 | -0.44424 |
| H    | -1.90152 | 2.302734 | -1.84186 |
| H    | -3.20498 | 2.986107 | -0.83147 |
| H    | -2.6924  | -1.18421 | 1.990232 |
| H    | -3.91148 | -2.12794 | 1.092928 |
| H    | -2.25476 | -2.75194 | 1.275784 |
| H    | -3.79717 | -2.30502 | -1.44374 |
| H    | -2.34624 | -1.71906 | -2.30324 |

|   |          |          |          |
|---|----------|----------|----------|
| H | -2.22993 | -3.10231 | -1.18238 |
| H | 0.577917 | 2.246499 | 0.27426  |
| H | 0.043563 | -2.67736 | -0.26304 |
| H | 3.095533 | 1.660451 | -1.85595 |
| H | 2.515001 | 2.899401 | -0.70746 |
| H | 4.239842 | 2.45853  | -0.74285 |
| C | 2.981943 | 0.961537 | 0.194718 |
| H | 3.08667  | 1.405929 | 1.205759 |
| C | 4.042938 | -0.0975  | 0.060888 |
| C | 2.647054 | -1.93393 | -0.093   |
| H | 2.922829 | -2.16056 | -1.13779 |
| H | 2.447746 | -2.87987 | 0.425621 |
| O | 5.276445 | 0.331887 | 0.44272  |
| H | 5.877504 | -0.42813 | 0.398576 |

Table S86. Frequencies (cm<sup>-1</sup>) of P3D\_v2.

|      |      |      |      |      |      |      |      |
|------|------|------|------|------|------|------|------|
| 39   | 50   | 78   | 110  | 138  | 138  | 190  | 216  |
| 225  | 235  | 242  | 248  | 259  | 263  | 271  | 278  |
| 288  | 292  | 310  | 323  | 332  | 347  | 353  | 373  |
| 386  | 398  | 437  | 450  | 480  | 508  | 534  | 552  |
| 556  | 566  | 606  | 633  | 682  | 722  | 748  | 766  |
| 785  | 820  | 835  | 872  | 912  | 920. | 932  | 945  |
| 947  | 954  | 982  | 993  | 1004 | 1013 | 1027 | 1037 |
| 1064 | 1090 | 1093 | 1106 | 1124 | 1154 | 1160 | 1170 |
| 1201 | 1206 | 1214 | 1218 | 1243 | 1248 | 1272 | 1280 |
| 1295 | 1301 | 1327 | 1330 | 1351 | 1352 | 1372 | 1374 |
| 1378 | 1380 | 1385 | 1391 | 1396 | 1401 | 1429 | 1439 |
| 1444 | 1448 | 1451 | 1456 | 1457 | 1461 | 1462 | 1463 |
| 1468 | 1469 | 1477 | 1480 | 1499 | 1544 | 1664 | 1706 |
| 2985 | 3034 | 3042 | 3046 | 3047 | 3051 | 3052 | 3055 |
| 3061 | 3119 | 3122 | 3122 | 3127 | 3131 | 3138 | 3138 |
| 3141 | 3141 | 3148 | 3149 | 3152 | 3153 | 3183 | 3187 |
| 3812 |      |      |      |      |      |      |      |

### TS4D\_v1

Figure S47. The optimized structure of TS4D\_v1 transition state.

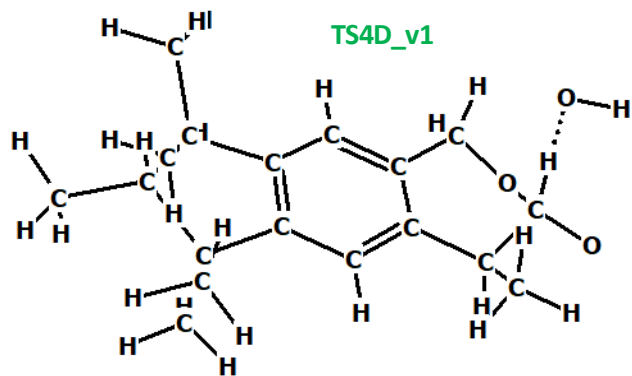

Table S87. Geometry (Å) of TS4D\_v1 transition state.

| Atom | x        | y        | z        |
|------|----------|----------|----------|
| O    | 3.73957  | -1.88633 | 0.68595  |
| C    | -2.94845 | 0.27359  | -0.50951 |
| C    | -1.85019 | 1.335367 | -0.18593 |
| C    | -2.42675 | -1.11077 | -0.00837 |
| C    | -0.60564 | 0.46977  | -0.10551 |
| C    | -0.92579 | -0.88668 | -0.00727 |
| C    | -4.35603 | 0.638288 | -0.05899 |
| C    | -2.06465 | 2.065017 | 1.149253 |
| C    | -1.75702 | 2.37764  | -1.30385 |
| C    | -2.90093 | -1.47689 | 1.406702 |
| C    | -2.84315 | -2.22854 | -0.96852 |
| C    | 0.722508 | 0.881442 | -0.09794 |
| C    | 0.087293 | -1.83056 | 0.112073 |
| C    | 1.754492 | -0.0632  | 0.00462  |
| C    | 1.426315 | -1.42215 | 0.12091  |
| C    | 3.518758 | 1.418174 | -1.10308 |
| H    | -2.95857 | 0.196171 | -1.6109  |
| H    | -4.42542 | 0.732793 | 1.034209 |
| H    | -4.67109 | 1.595715 | -0.50119 |
| H    | -5.07901 | -0.12797 | -0.37795 |
| H    | -1.2024  | 2.716837 | 1.358212 |
| H    | -2.96447 | 2.697779 | 1.109921 |
| H    | -2.16925 | 1.366883 | 1.991744 |
| H    | -0.98226 | 3.128272 | -1.08338 |
| H    | -1.51448 | 1.902372 | -2.26601 |
| H    | -2.71526 | 2.909982 | -1.41123 |
| H    | -2.65807 | -0.69653 | 2.141801 |
| H    | -3.9891  | -1.6415  | 1.423862 |
| H    | -2.41282 | -2.40841 | 1.732209 |
| H    | -3.94119 | -2.28621 | -1.03373 |
| H    | -2.44492 | -2.04922 | -1.97837 |
| H    | -2.4779  | -3.20719 | -0.62023 |
| H    | 0.962274 | 1.944731 | -0.16874 |

|   |          |          |          |
|---|----------|----------|----------|
| H | -0.14809 | -2.89493 | 0.204663 |
| H | 3.336215 | 0.961229 | -2.08631 |
| H | 2.898409 | 2.317682 | -1.00788 |
| H | 4.571372 | 1.725562 | -1.04811 |
| C | 3.203833 | 0.409983 | 0.001095 |
| H | 3.439515 | 0.842571 | 0.987997 |
| C | 4.122174 | -0.83965 | -0.14956 |
| H | 3.988781 | -1.19446 | -1.2588  |
| C | 2.517077 | -2.45793 | 0.245907 |
| H | 2.681445 | -2.96204 | -0.72399 |
| H | 2.248936 | -3.21814 | 0.989558 |
| O | 5.369262 | -0.4326  | 0.109269 |
| O | 3.823432 | -1.53237 | -2.68132 |
| H | 4.757561 | -1.34748 | -2.91053 |

Table S88. Frequencies (cm<sup>-1</sup>) of TS4D\_v1 transition state.

|      |      |      |      |      |      |       |      |
|------|------|------|------|------|------|-------|------|
| 26   | 39   | 52   | 75   | 94   | 108  | 136   | 143  |
| 196  | 224  | 226  | 230  | 238  | 246  | 252   | 255  |
| 264  | 269  | 281  | 286  | 302  | 316  | 328   | 332  |
| 344  | 348  | 372  | 397  | 438  | 449  | 462   | 503  |
| 519  | 531  | 555  | 563  | 598  | 629  | 674   | 687  |
| 719  | 727  | 769  | 784  | 810  | 832  | 843   | 874  |
| 915  | 921  | 935  | 943  | 945  | 954  | 969   | 990  |
| 995  | 1004 | 1015 | 1027 | 1066 | 1091 | 1095  | 1106 |
| 1111 | 1153 | 1158 | 1163 | 1174 | 1191 | 1210  | 1217 |
| 1223 | 1241 | 1245 | 1255 | 1276 | 1281 | 1295  | 1307 |
| 1325 | 1351 | 1352 | 1372 | 1375 | 1379 | 1383  | 1387 |
| 1390 | 1391 | 1393 | 1394 | 1440 | 1444 | 1446  | 1453 |
| 1456 | 1457 | 1459 | 1461 | 1465 | 1466 | 1468  | 1473 |
| 1476 | 1489 | 1545 | 1664 | 1704 | 3041 | 3041  | 3042 |
| 3047 | 3050 | 3054 | 3057 | 3064 | 3076 | 3120  | 3120 |
| 3130 | 3131 | 3133 | 3134 | 3137 | 3139 | 3143  | 3151 |
| 3152 | 3163 | 3176 | 3183 | 3205 | 3706 | -1180 |      |

### TS4D\_v2

Figure S48. The optimized structure of TS4D\_v2 transition state.

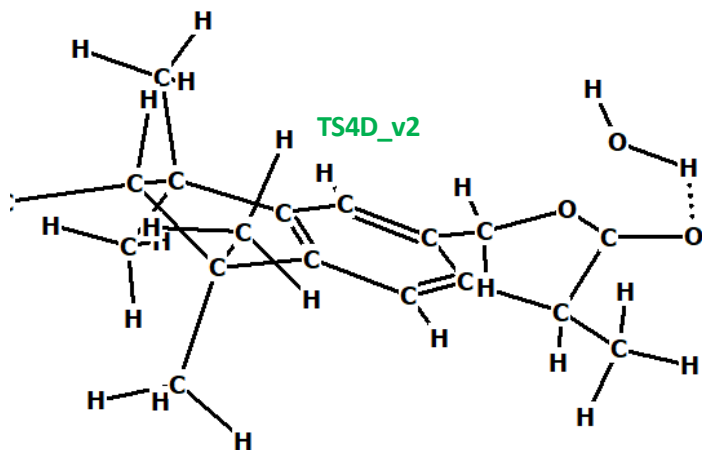

Table S89. Geometry (Å) of TS4D\_v2 transition state.

| Atom | x        | y        | z        |
|------|----------|----------|----------|
| O    | 3.73957  | -1.88633 | 0.68595  |
| C    | -2.94845 | 0.27359  | -0.50951 |
| C    | -1.85019 | 1.335367 | -0.18593 |
| C    | -2.42675 | -1.11077 | -0.00837 |
| C    | -0.60564 | 0.46977  | -0.10551 |
| C    | -0.92579 | -0.88668 | -0.00727 |
| C    | -4.35603 | 0.638288 | -0.05899 |
| C    | -2.06465 | 2.065017 | 1.149253 |
| C    | -1.75702 | 2.37764  | -1.30385 |
| C    | -2.90093 | -1.47689 | 1.406702 |
| C    | -2.84315 | -2.22854 | -0.96852 |
| C    | 0.722508 | 0.881442 | -0.09794 |
| C    | 0.087293 | -1.83056 | 0.112073 |
| C    | 1.754492 | -0.0632  | 0.00462  |
| C    | 1.426315 | -1.42215 | 0.12091  |
| C    | 3.518758 | 1.418174 | -1.10308 |
| H    | -2.95857 | 0.196171 | -1.6109  |
| H    | -4.42542 | 0.732793 | 1.034209 |
| H    | -4.67109 | 1.595715 | -0.50119 |
| H    | -5.07901 | -0.12797 | -0.37795 |
| H    | -1.2024  | 2.716837 | 1.358212 |
| H    | -2.96447 | 2.697779 | 1.109921 |
| H    | -2.16925 | 1.366883 | 1.991744 |
| H    | -0.98226 | 3.128272 | -1.08338 |
| H    | -1.51448 | 1.902372 | -2.26601 |
| H    | -2.71526 | 2.909982 | -1.41123 |
| H    | -2.65807 | -0.69653 | 2.141801 |
| H    | -3.9891  | -1.6415  | 1.423862 |
| H    | -2.41282 | -2.40841 | 1.732209 |
| H    | -3.94119 | -2.28621 | -1.03373 |
| H    | -2.44492 | -2.04922 | -1.97837 |

|   |          |          |          |
|---|----------|----------|----------|
| H | -2.4779  | -3.20719 | -0.62023 |
| H | 0.962274 | 1.944731 | -0.16874 |
| H | -0.14809 | -2.89493 | 0.204663 |
| H | 3.336215 | 0.961229 | -2.08631 |
| H | 2.898409 | 2.317682 | -1.00788 |
| H | 4.571372 | 1.725562 | -1.04811 |
| C | 3.203833 | 0.409983 | 0.001095 |
| H | 3.439515 | 0.842571 | 0.987997 |
| C | 4.122174 | -0.83965 | -0.14956 |
| H | 3.988781 | -1.19446 | -1.2588  |
| C | 2.517077 | -2.45793 | 0.245907 |
| H | 2.681445 | -2.96204 | -0.72399 |
| H | 2.248936 | -3.21814 | 0.989558 |
| O | 5.369262 | -0.4326  | 0.109269 |
| O | 3.823432 | -1.53237 | -2.68132 |
| H | 4.757561 | -1.34748 | -2.91053 |

Table S90. Frequencies (cm<sup>-1</sup>) of TS4D\_v2 transition state.

|      |      |      |      |      |      |       |      |
|------|------|------|------|------|------|-------|------|
| 24   | 40   | 58   | 64   | 103  | 112  | 136   | 143  |
| 191  | 222  | 229  | 233  | 241  | 250  | 255   | 262  |
| 268  | 270  | 282  | 292  | 300  | 316  | 328   | 331  |
| 342  | 347  | 373  | 398  | 436  | 445  | 464   | 504  |
| 514  | 531  | 554  | 561  | 597  | 627  | 669   | 689  |
| 709  | 722  | 770  | 785  | 801  | 831  | 833   | 856  |
| 912  | 919  | 936  | 944  | 946  | 954  | 968   | 990  |
| 992  | 1004 | 1012 | 1028 | 1065 | 1090 | 1092  | 1105 |
| 1112 | 1153 | 1158 | 1162 | 1192 | 1202 | 1215  | 1218 |
| 1237 | 1245 | 1260 | 1268 | 1284 | 1292 | 1295  | 1307 |
| 1325 | 1350 | 1350 | 1353 | 1373 | 1374 | 1382  | 1384 |
| 1389 | 1390 | 1392 | 1396 | 1440 | 1444 | 1446  | 1451 |
| 1455 | 1458 | 1458 | 1462 | 1462 | 1466 | 1468  | 1474 |
| 1476 | 1490 | 1545 | 1666 | 1704 | 3040 | 3042  | 3044 |
| 3048 | 3051 | 3054 | 3057 | 3060 | 3074 | 3120  | 3121 |
| 3130 | 3133 | 3133 | 3137 | 3137 | 3141 | 3142  | 3152 |
| 3152 | 3162 | 3174 | 3176 | 3200 | 3715 | -1243 |      |

### ProductD

Figure S49. The optimized structure of ProductD.

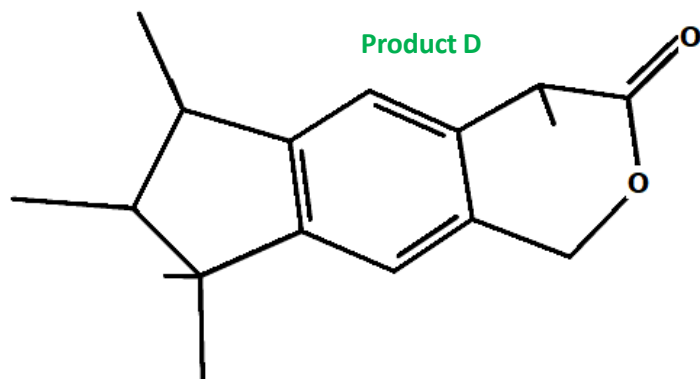

Table S91. Geometry (Å) of ProductD.

| Atom | x        | y        | z        |
|------|----------|----------|----------|
| O    | 3.40492  | -2.1545  | 0.239935 |
| C    | -3.16901 | 0.524526 | -0.10033 |
| C    | -1.98026 | 1.466896 | 0.266325 |
| C    | -2.68582 | -0.94441 | 0.107846 |
| C    | -0.78938 | 0.5484   | 0.058439 |
| C    | -1.18129 | -0.7906  | -0.02986 |
| C    | -4.50017 | 0.871095 | 0.551477 |
| C    | -2.00608 | 1.96527  | 1.719281 |
| C    | -1.94125 | 2.680383 | -0.66688 |
| C    | -3.02641 | -1.52319 | 1.489992 |
| C    | -3.27051 | -1.86638 | -0.96594 |
| C    | 0.557864 | 0.896752 | -0.01371 |
| C    | -0.22878 | -1.79538 | -0.18663 |
| C    | 1.514067 | -0.10608 | -0.1909  |
| C    | 1.120121 | -1.44503 | -0.27565 |
| C    | 3.396783 | 0.363426 | -1.80934 |
| H    | -3.29441 | 0.633087 | -1.19201 |
| H    | -4.45955 | 0.786208 | 1.64712  |
| H    | -4.79857 | 1.901601 | 0.30491  |
| H    | -5.29633 | 0.201423 | 0.191991 |
| H    | -1.0907  | 2.539398 | 1.930626 |
| H    | -2.86789 | 2.628327 | 1.889668 |
| H    | -2.05771 | 1.1378   | 2.440929 |
| H    | -1.1037  | 3.348973 | -0.41446 |
| H    | -1.83129 | 2.368251 | -1.71611 |
| H    | -2.87177 | 3.262313 | -0.57395 |
| H    | -2.65392 | -0.8912  | 2.308503 |
| H    | -4.11461 | -1.63852 | 1.608642 |
| H    | -2.5677  | -2.51822 | 1.59857  |
| H    | -4.37053 | -1.86615 | -0.91176 |
| H    | -2.97282 | -1.53751 | -1.97273 |
| H    | -2.93042 | -2.90421 | -0.82621 |
| H    | 0.875217 | 1.940727 | 0.061654 |



|   |          |          |          |
|---|----------|----------|----------|
| H | -0.52425 | -2.84683 | -0.24    |
| H | 3.171585 | -0.54066 | -2.39336 |
| H | 2.839236 | 1.201669 | -2.24831 |
| H | 4.472718 | 0.572762 | -1.88526 |
| C | 2.9852   | 0.197727 | -0.33378 |
| H | 3.237226 | 1.122313 | 0.201563 |
| C | 3.839181 | -0.88273 | 0.302803 |
| C | 2.201052 | -2.46928 | -0.47935 |
| H | 2.45503  | -2.57491 | -1.54647 |
| H | 1.892517 | -3.45283 | -0.10719 |
| O | 4.892495 | -0.65552 | 0.845409 |

Table S92. Frequencies (cm<sup>-1</sup>) of ProductD.

|      |      |      |      |      |      |      |      |
|------|------|------|------|------|------|------|------|
| 47   | 50   | 82   | 110  | 138  | 142  | 166  | 196  |
| 213  | 233  | 236  | 238  | 255  | 261  | 267  | 277  |
| 292  | 292  | 312  | 318  | 332  | 352  | 359  | 377  |
| 401  | 445  | 450  | 507  | 530  | 556  | 558  | 569  |
| 613  | 652  | 689  | 713  | 750  | 761  | 777  | 803  |
| 811  | 841  | 858  | 916  | 922  | 934  | 946  | 946  |
| 955  | 968  | 992  | 1002 | 1005 | 1027 | 1032 | 1060 |
| 1086 | 1091 | 1104 | 1129 | 1152 | 1161 | 1197 | 1210 |
| 1216 | 1223 | 1246 | 1250 | 1265 | 1278 | 1295 | 1303 |
| 1305 | 1348 | 1353 | 1360 | 1368 | 1373 | 1374 | 1379 |
| 1385 | 1390 | 1397 | 1419 | 1440 | 1444 | 1448 | 1452 |
| 1454 | 1455 | 1458 | 1462 | 1464 | 1470 | 1474 | 1478 |
| 1483 | 1506 | 1545 | 1673 | 1707 | 1854 | 3040 | 3041 |
| 3045 | 3049 | 3050 | 3056 | 3059 | 3076 | 3112 | 3117 |
| 3119 | 3120 | 3129 | 3130 | 3131 | 3136 | 3141 | 3142 |
| 3150 | 3153 | 3157 | 3158 | 3190 | 3194 |      |      |

Figure S50. Energy profile of the proposed 2-nd channel of the reaction mechanism under oxidative conditions.

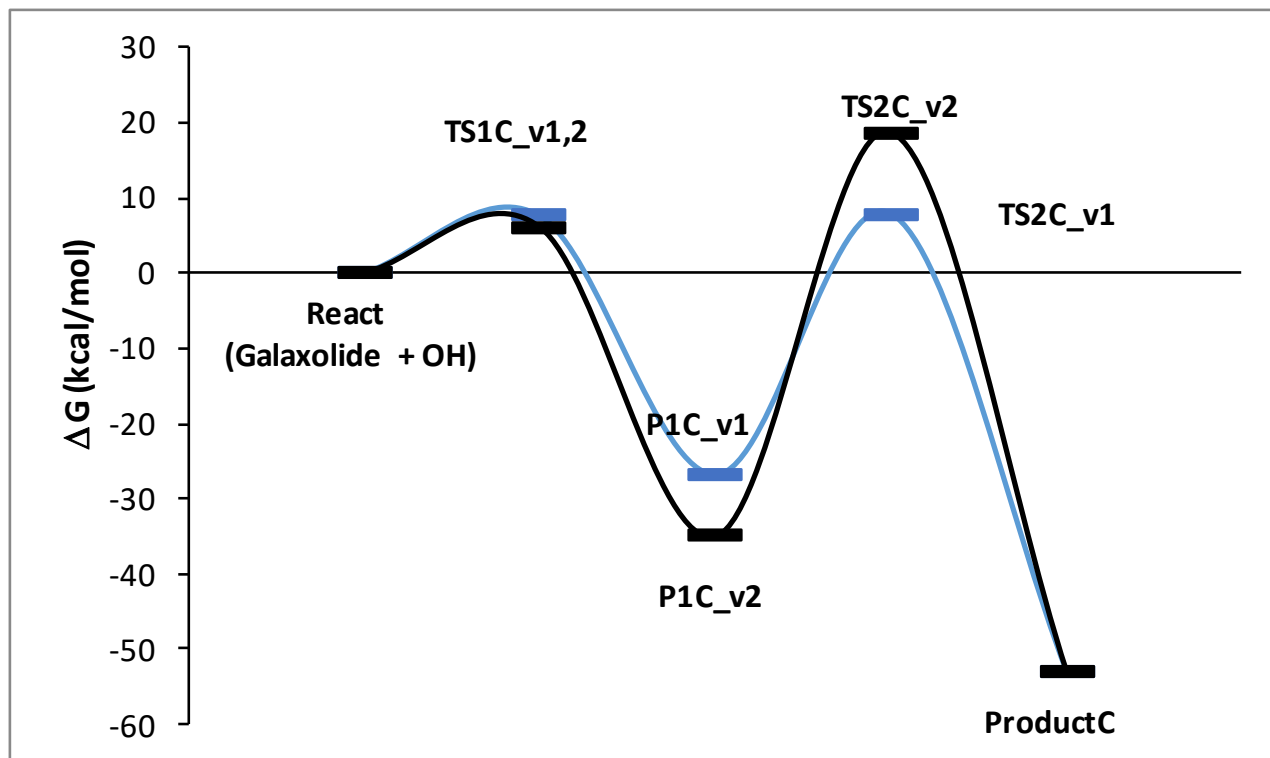

Energy profile of the proposed 2-nd channel of the reaction mechanism under oxidative conditions. (in terms of  $\Delta G$  values, kcal/mol). To be comparable with galaxolide + OH,  $\Delta G$  values were corrected with the values appropriate for species gained/lost during the course of the reaction. Species are pictured in Figure S51.

Figure S51: The optimized (at the M06-2X/cc-pVDZ level) geometries of the species involved in the reaction scheme from Figure S50.

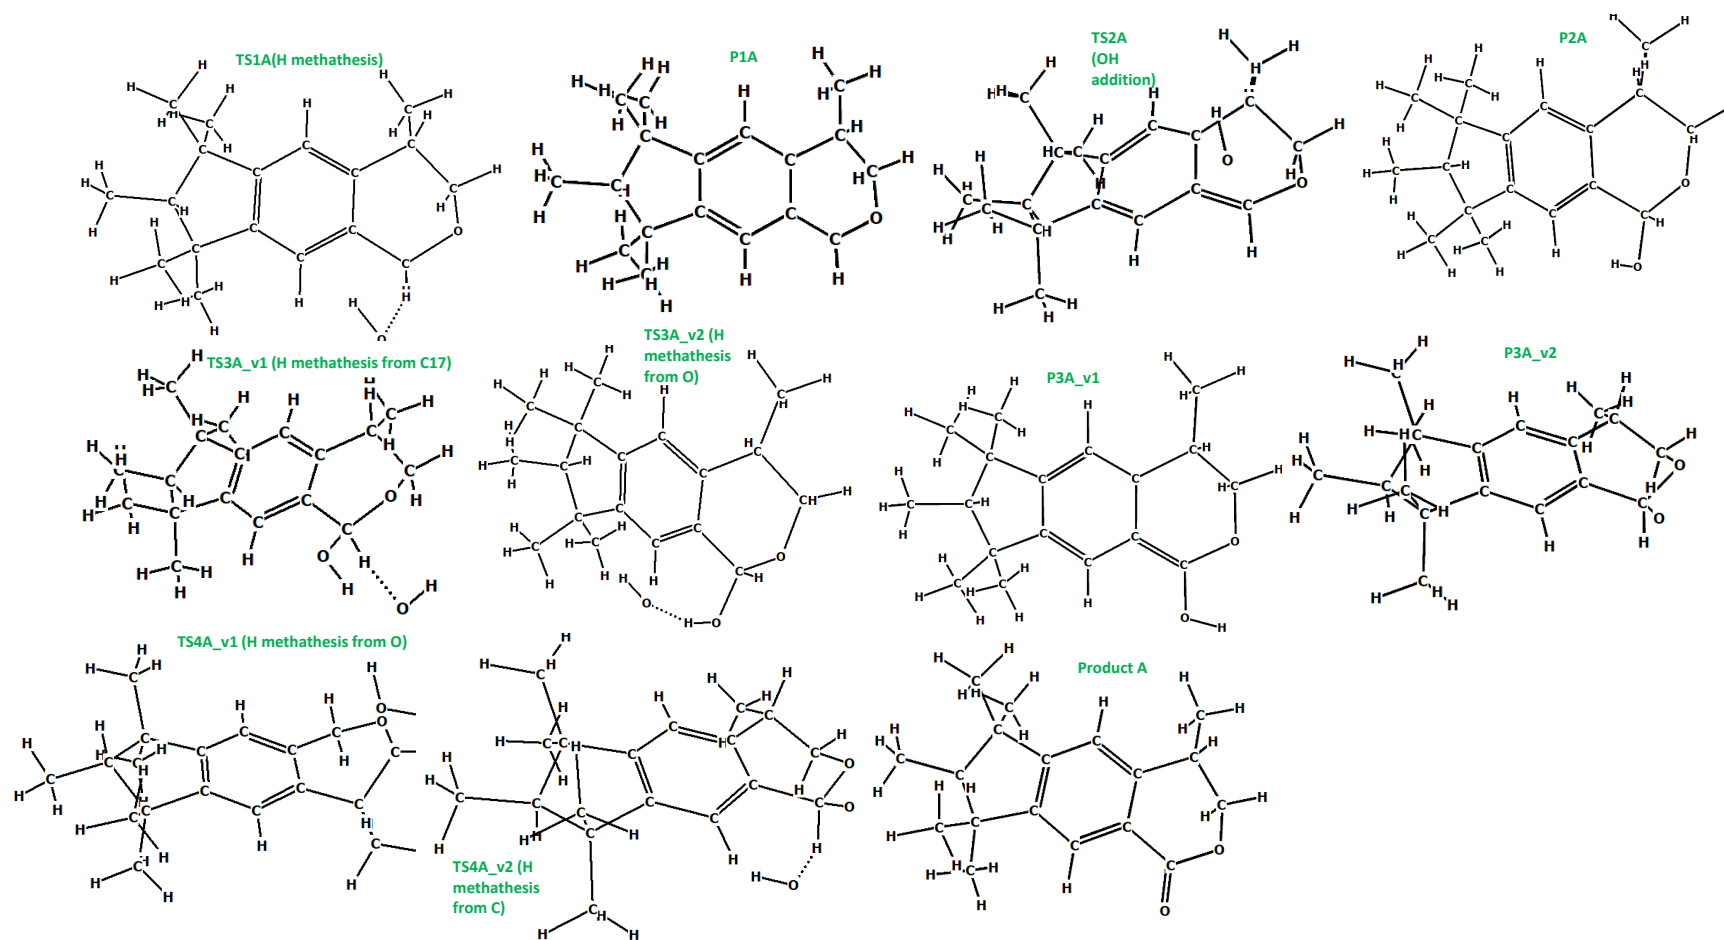

Figure S52: Energy profile of the proposed 3-rd channel of the reaction mechanism under oxidative condition.

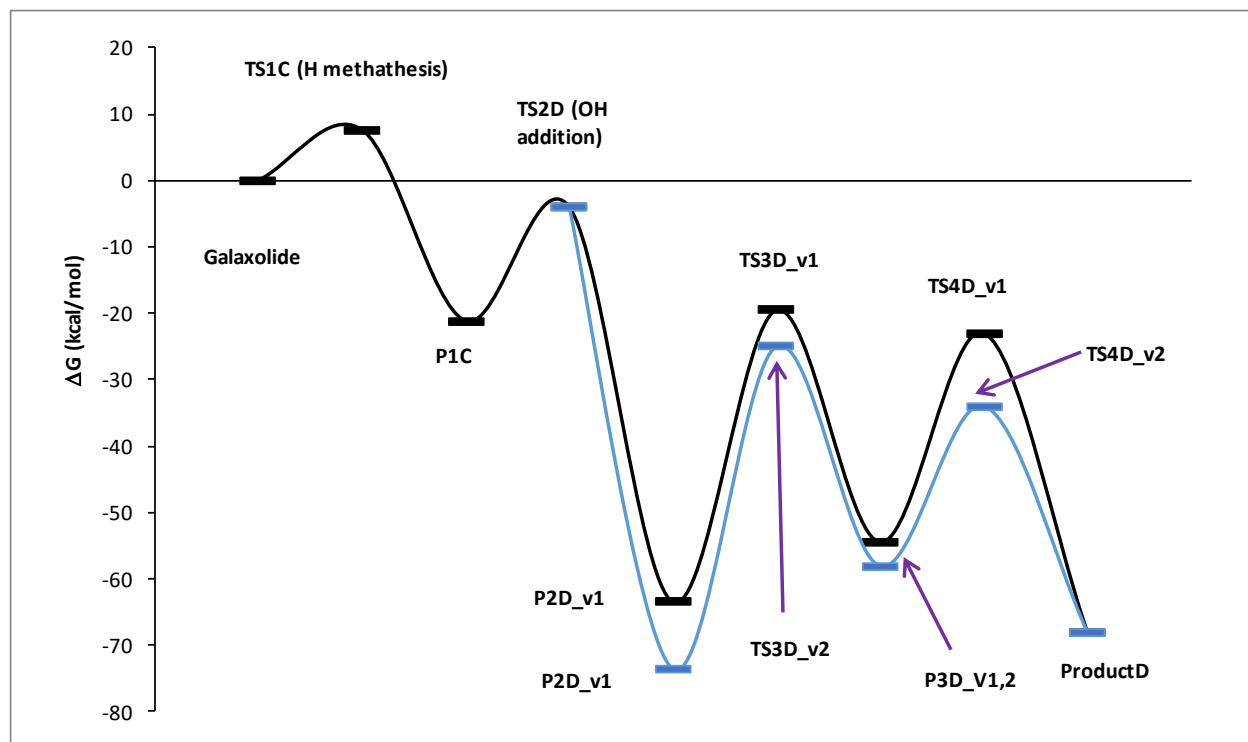

Energy profile of the proposed 3-rd channel of the reaction mechanism under oxidative conditions. (in terms of  $\Delta G$  values, kcal/mol). To be comparable with galaxolide + OH,  $\Delta G$  values were corrected with the values appropriate for species gained/lost during the reaction. Species are pictured in Figure S53.

Figure S53. The optimized (at the M06-2X/cc-pVDZ level) geometries of the species involved in the reaction scheme from Figure S52.

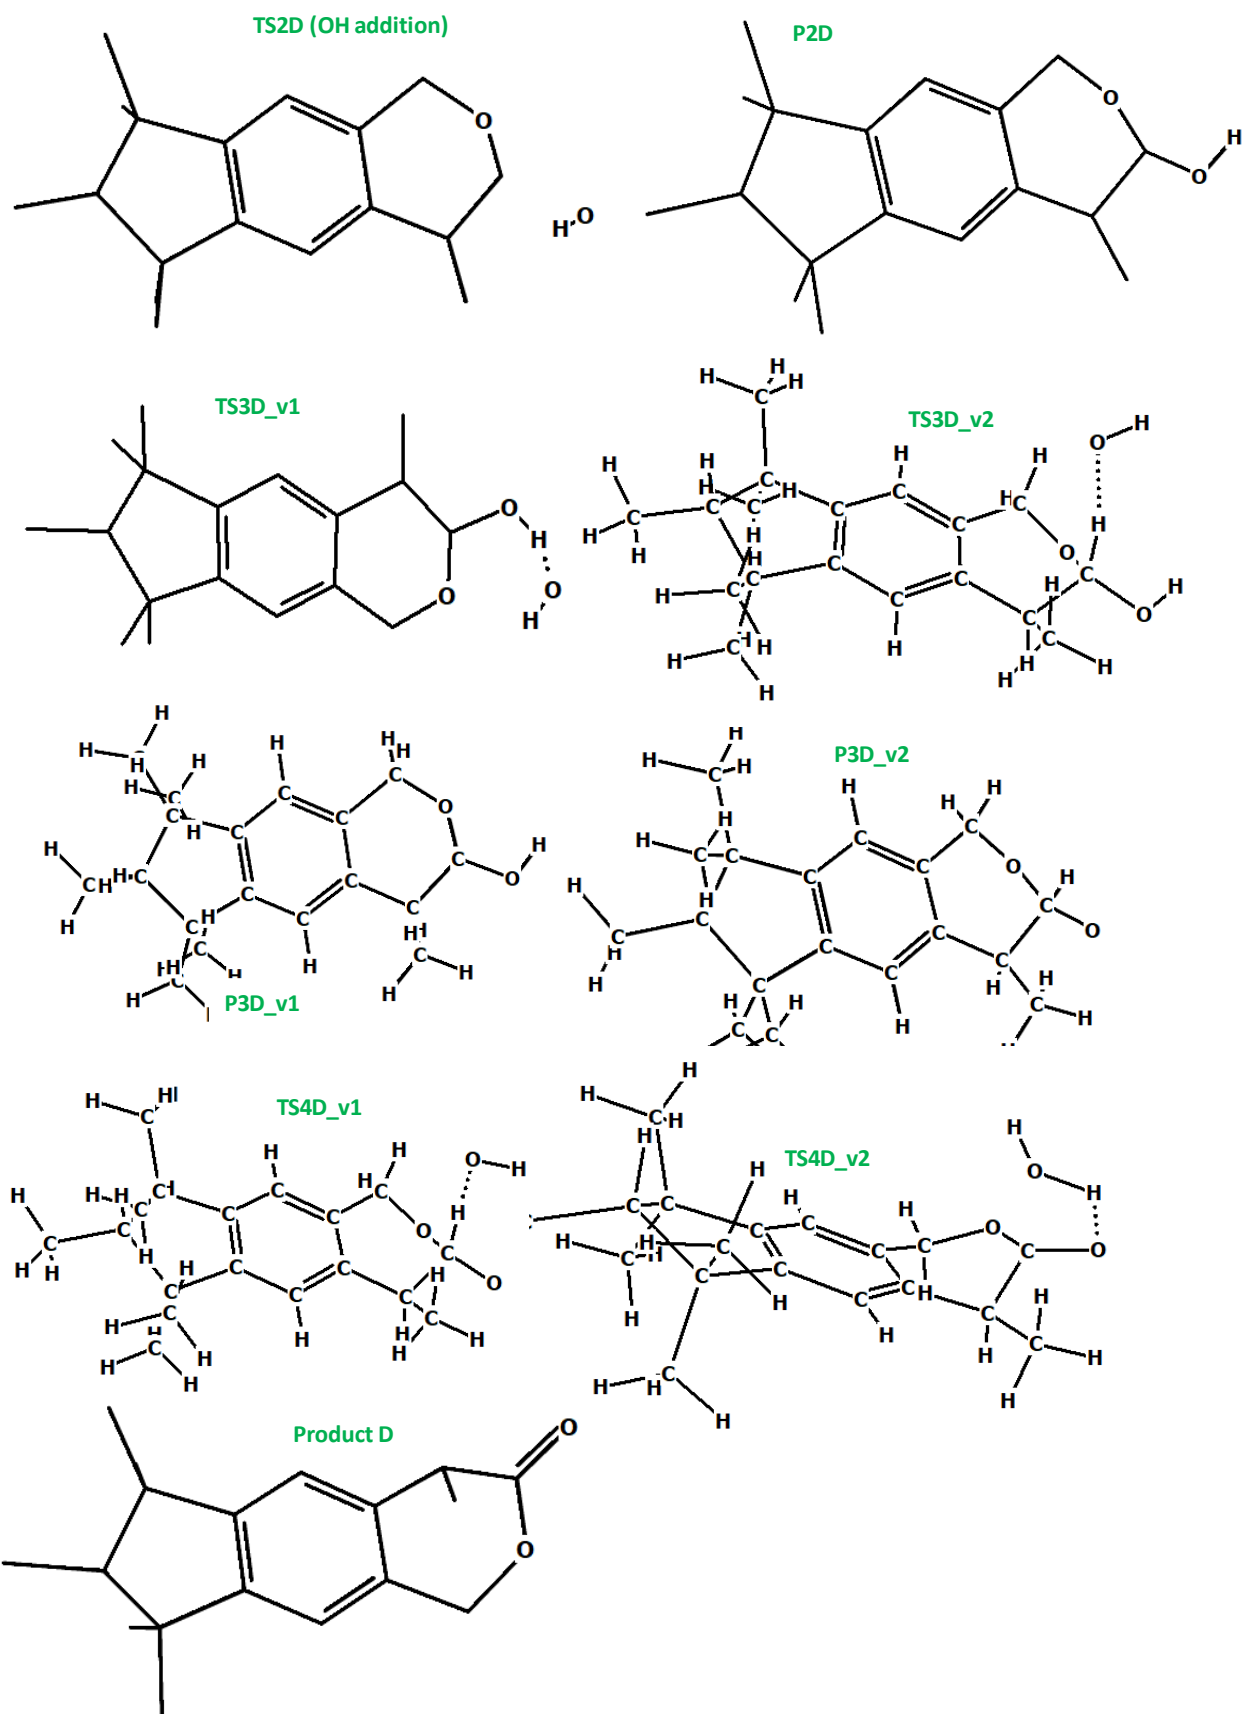

Supplement: s1 [file s1]
